# Supplementary material for: Metal-free radical selenothiocyanation of terminal and internal alkynes
Source: Royal Society of Chemistry journal article supplement (doi:10.1039/d4cc03391d), 2024-01-01
Supplement: d4cc03391d1.pdf [file d4cc03391d1.pdf]

## Supporting Information

### Metal-Free Radical Selenothiocyation of Terminal and Internal Alkynes

Jiabin Chen,<sup>a§</sup> Xiaoyan Bai,<sup>a§</sup> Haobo Jiang,<sup>a</sup> Cong Zhao,<sup>a</sup> Ya Li,<sup>a</sup>  
Mingming Chu,<sup>b</sup> Yiming Li,<sup>b\*</sup> Min Zhang,<sup>c\*</sup> Lu Chen<sup>a\*</sup>

<sup>a</sup> School of Environmental and Chemical Engineering, Jiangmen Key Laboratory of Synthetic Chemistry and Cleaner Production, Wuyi University, Jiangmen 529020, P.R. China

<sup>b</sup> College of Biological, Chemical Science and Engineering, Jiaying University, Jiaying 314001, P.R. China

<sup>c</sup> Key Lab of Functional Molecular Engineering of Guangdong Province, School of Chemistry and Chemical Engineering, South China University of Technology, Wushan Rd-381, Guangzhou 510641, P.R. China

#### Corresponding Authors

\*Email: wyuchemcl@126.com; liyiming@zjxu.edu.cn; minzhang@scut.edu.cn

## Table of Contents

|                                                                                         |           |
|-----------------------------------------------------------------------------------------|-----------|
| <b>General information.....</b>                                                         | <b>1</b>  |
| <b>Substrate preparation.....</b>                                                       | <b>2</b>  |
| <b>General procedure for (<i>E</i>)-phenyl(1-phenyl-2-thiocyanatovinyl)selane .....</b> | <b>4</b>  |
| <b>Application: .....</b>                                                               | <b>4</b>  |
| <b>Analytic data of the obtained compounds.....</b>                                     | <b>5</b>  |
| <b>Crystal data of 4f.....</b>                                                          | <b>11</b> |
| <b>NMR spectra of the obtained compounds.....</b>                                       | <b>13</b> |
| <b>References .....</b>                                                                 | <b>56</b> |

## General information

Chemicals and solvents were purchased from commercial sources (Energy Chemical, J&KChemic, TCI, Fluka, Acros, SCRC) and used without further purification unless noted. All products were purified by flash chromatography on silica gel. The chemical yields referred are isolated products.  $^1\text{H}$ ,  $^{13}\text{C}$  and  $^{19}\text{F}$  Nuclear Magnetic Resonance spectra were recorded on Bruker 500 MHz NMR spectrometer using deuterated chloroform ( $\text{CDCl}_3$ ) as solvent and tetramethylsilane (TMS) as an internal standard.  $^1\text{H}$  NMR and  $^{13}\text{C}$  NMR spectra were recorded on 500MHz MHz Bruker spectrometers. Chemical shifts of  $^1\text{H}$  were reported in part per million relative to the  $\text{CDCl}_3$  residual peak ( $\delta$  7.280). Chemical shifts of  $^{13}\text{C}$  NMR were reported relative to  $\text{CDCl}_3$  ( $\delta$  77.00). Chemical shifts were reported in parts per million (ppm,  $\delta$ ) downfield from tetramethylsilane. The used abbreviations are as follows: s (singlet), d (doublet), t (triplet), quart. (quartet), quint (quintet), m (multiplet). Multiplets which arise from accidental equality of coupling constants of magnetically non-equivalent protons are marked as virtual (virt.). High resolution mass spectra (HRMS) data were measured by ESI-microTOF II. Melting points were measured by SGW® X-4B and are not corrected. Reactions were monitored by TLC analysis using silica gel 60 Å F-254 thin layer plates and compounds were visualized with a UV light at 254 nm or 365 nm. Reaction solvent and eluent without further purification: Ethyl acetate (AR,  $\geq 99.5\%$ ), Petroleum ether (60-90 °C) (AR,  $\geq 99.9\%$ ), Dichloromethane (AR,  $\geq 99.9\%$ ), Hexane (AR,  $\geq 97\%$ ). The starting material is labeled as **1a-1w**, **2a-2f**.

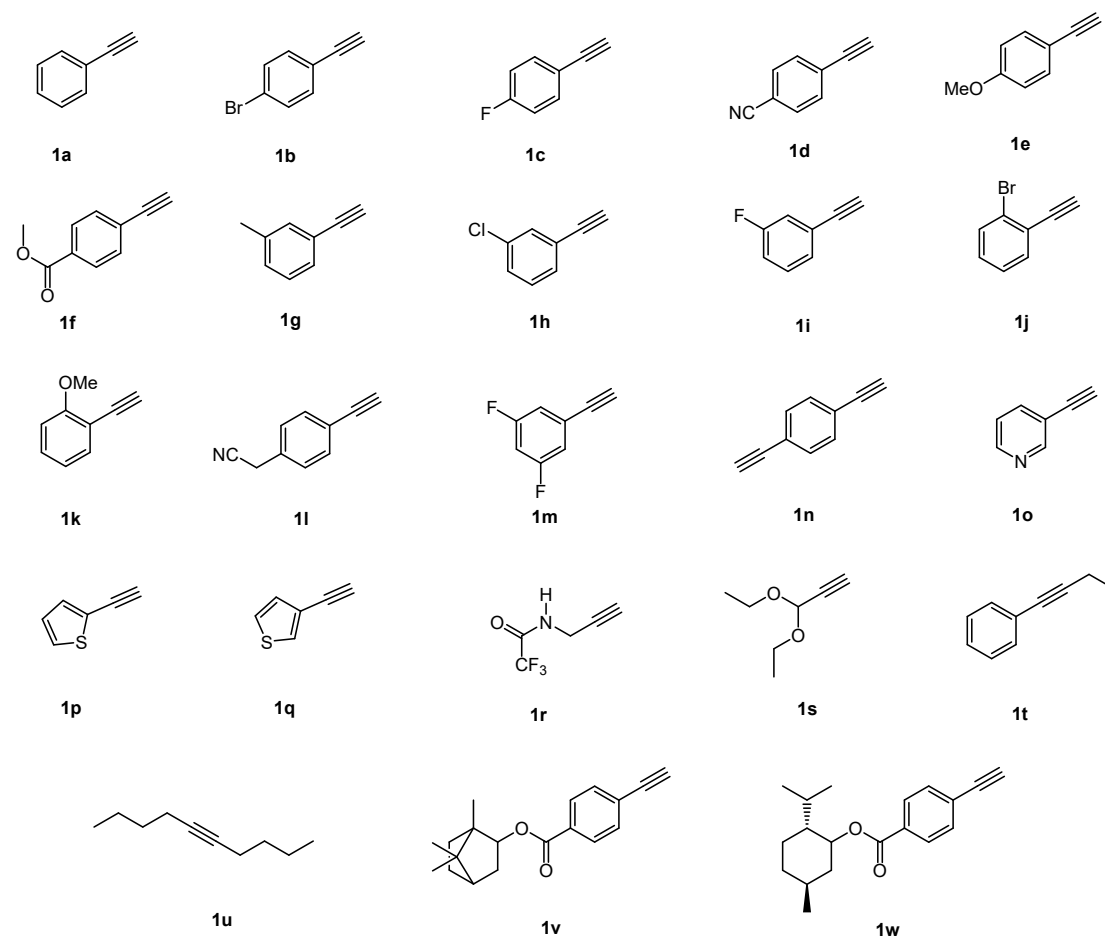

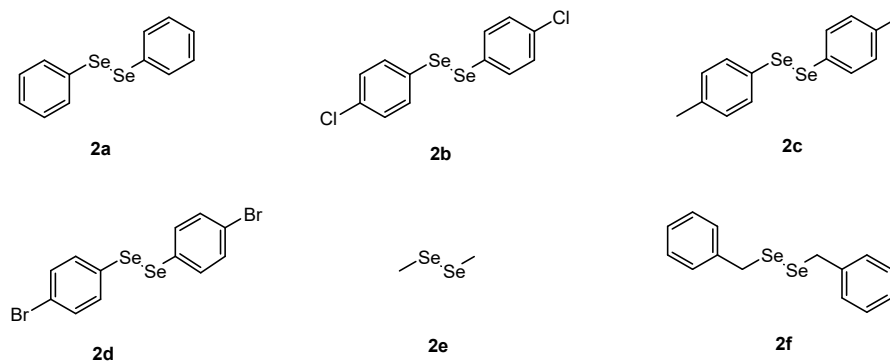

**Scheme S1.** Substrates employed for the reaction

### Substrate preparation

**Synthesis of compound 1v**<sup>1</sup>: In a 25 mL round-bottom flask, L(-)-Borneol **b1** (1.0 mmol, 154.2 mg), 4-ethynyl-benzoic acid (1.2 mmol, 197.0 mg), DMAP (0.1 mmol, 12.2 mg), CH<sub>2</sub>Cl<sub>2</sub> (10.0 mL) and dicyclohexylcarbodiimide (2.0 mmol, 412.6 mg) were successively added. The mixture was stirred at room temperature overnight. The reaction was quenched with aqueous NH<sub>4</sub>Cl (10 mL), extracted with EtOAc (3 × 30 mL). The combined ethyl acetate layer was washed with brine (10 mL) and dried over anhydrous Na<sub>2</sub>SO<sub>4</sub>. The solvent was removed under vacuum. The crude product was purified by flash column chromatography (eluting with petroleum ether/ethyl acetate = 10/1) on silica gel to afford product **1v** (191.9 mg, 68% isolated yield) as a white solid.

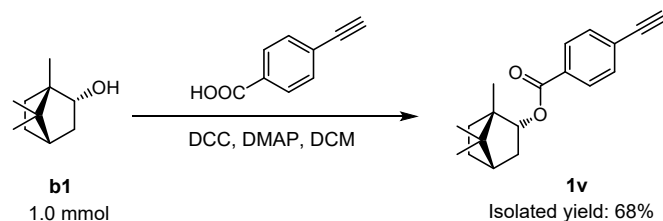

**Scheme S2.** The general procedure synthesis experiment of **1v**

**Synthesis of compound 1w**<sup>1</sup>: In a 25 mL round-bottom flask, L-Menthol **b2** (2.0 mmol, 312.5 mg), 4-ethynyl-benzoic acid (2.4 mmol, 394.0 mg), DMAP (0.2 mmol, 24.4 mg), CH<sub>2</sub>Cl<sub>2</sub> (10.0 mL) and dicyclohexylcarbodiimide (4.0 mmol, 825.3 mg) were successively added. The mixture was stirred at room temperature overnight. The reaction was quenched with aqueous NH<sub>4</sub>Cl, extracted with EtOAc (3 × 30 mL). The combined ethyl acetate layer was washed with brine (10 mL) and dried over anhydrous Na<sub>2</sub>SO<sub>4</sub>. The solvent was removed under vacuum. The crude product was purified by flash column chromatography (eluting with petroleum ether/ethyl acetate = 10/1) on silica gel to afford product **1w** (341.3 mg, 60% yield) with light yellow liquid.

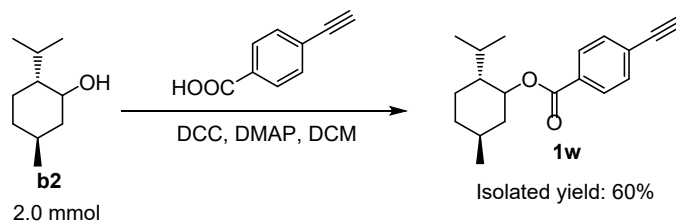

**Scheme S3.** The general procedure synthesis experiment of **1w**

**Synthesis of compound 2**<sup>2</sup>: To a stirred solution of Se powder (2.0 mmol, 162.0 mg) and halides **b3** (1.0 mmol) in DMSO (4.0 mL) was added by using CuMo<sub>6</sub> catalyst (0.5 mol%) followed by KOH (2.0 equiv) at 90 °C for 8 h under air atmosphere. After completion of the reaction, 3.0 mL of water was added and the mixture was extracted three times with ethyl acetate (3 × 3.0 mL). The combined organic layer was washed with brine, dried over anhydrous Na<sub>2</sub>SO<sub>4</sub> and concentrated under reduced pressure. Then, the product **2** was obtained by flash column chromatography on silica gel.

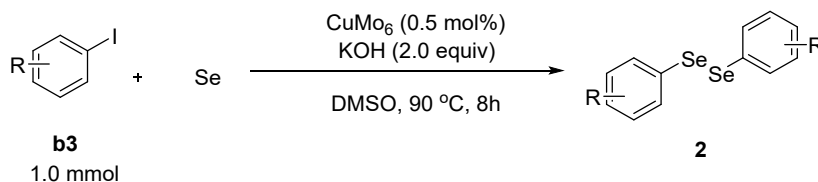

**Scheme S4.** The general procedure synthesis experiment of **2**

(1*S*,2*R*,4*S*)-1,7,7-trimethylbicyclo [2.2.1] heptan-2-yl 4-ethynylbenzoate (**1v**)<sup>1</sup>

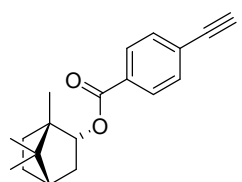

White solid (191.9 mg, 68%, mp: 100-103 °C). TLC (petroleum ether/EtOAc = 10:1),  $R_f$  = 0.6. <sup>1</sup>H NMR (500 MHz, CDCl<sub>3</sub>)  $\delta$  8.03 (d,  $J$  = 8.3 Hz, 2H), 7.58 (d,  $J$  = 8.4 Hz, 2H), 5.15-5.12 (m, 1H), 3.25 (s, 1H), 2.50 (d,  $J$  = 4.4 Hz, 1H), 2.14 (d,  $J$  = 13.5 Hz, 1H), 1.87 – 1.80 (m, 1H), 1.77 (t,  $J$  = 4.5 Hz, 1H), 1.43 (t,  $J$  = 12.5 Hz, 1H), 1.36 – 1.30 (m, 1H), 1.14 (dd,  $J$  = 13.9, 3.5 Hz, 1H), 0.99 (s, 3H), 0.94 (d,  $J$  = 3.7 Hz, 6H). <sup>13</sup>C NMR (125 MHz, CDCl<sub>3</sub>)  $\delta$  166.2, 132.1, 130.9, 129.4, 126.6, 82.9, 80.9, 80.0, 49.1, 47.9, 45.0, 36.9, 28.1, 27.4, 19.7, 18.9, 13.6.

(2*R*,5*S*)-2-isopropyl-5-methylcyclohexyl 4-ethynylbenzoate (**1w**)<sup>1</sup>

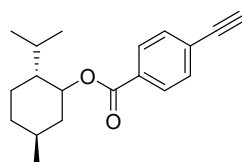

Light yellow oil (341.3 mg, 60%). TLC (petroleum ether/EtOAc = 10:1),  $R_f$  = 0.6. <sup>1</sup>H NMR (500 MHz, CDCl<sub>3</sub>)  $\delta$  8.02 (d,  $J$  = 8.4 Hz, 2H), 7.57 (d,  $J$  = 8.3 Hz, 2H), 4.95 (td,  $J$  = 10.9, 4.4 Hz, 1H), 3.25 (s, 1H), 2.14 (d,  $J$  = 12.5 Hz, 1H), 1.96 (ddd,  $J$  = 11.3, 7.0, 3.5 Hz, 1H), 1.78 – 1.73 (m, 2H), 1.62 – 1.55 (m, 2H), 1.17 – 1.10 (m, 2H), 0.94 (t,  $J$  = 6.5 Hz, 7H), 0.81 (d,  $J$  = 7.0 Hz, 3H). <sup>13</sup>C NMR (125 MHz, CDCl<sub>3</sub>)  $\delta$  165.4, 132.0, 130.8, 129.4, 126.5, 82.9, 79.9, 75.1, 47.2, 40.9, 34.3, 31.4, 26.5, 23.6, 22.0, 20.7, 16.5.

1,2-bis(4-chlorophenyl)diselenide (**2b**)<sup>2</sup>

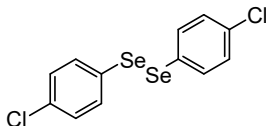

Orange oil (342.9 mg, 90%). TLC (petroleum ether),  $R_f$  = 0.5. <sup>1</sup>H NMR (500 MHz, CDCl<sub>3</sub>)  $\delta$  7.55 – 7.51 (m, 4H), 7.28 – 7.25 (m, 4H). <sup>13</sup>C NMR (125 MHz, CDCl<sub>3</sub>)  $\delta$  134.3, 133.3, 129.4, 128.8.

1, 2-di-p-tolyldiselenide (**2c**)<sup>2</sup>

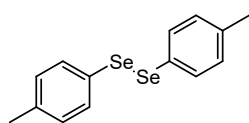

Light yellow oil (289.2 mg, 85%). TLC (petroleum ether),  $R_f$  = 0.5. <sup>1</sup>H NMR (500 MHz, CDCl<sub>3</sub>)  $\delta$  7.53 (d,  $J$  = 8.1 Hz, 4H), 7.11 (d,  $J$  = 7.9 Hz, 4H), 2.38 (s, 6H). <sup>13</sup>C NMR (125 MHz, CDCl<sub>3</sub>)  $\delta$  137.9, 132.3, 129.9, 127.6, 21.1.

1,2-bis(4-bromophenyl)diselenide (**2d**)<sup>2</sup>

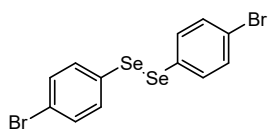

Dark orange oil (329.0 mg, 70%). TLC (petroleum ether),  $R_f = 0.5$ .  $^1\text{H}$  NMR (500 MHz,  $\text{CDCl}_3$ )  $\delta$  7.50 – 7.45 (m, 4H), 7.43 – 7.39 (m, 4H).  $^{13}\text{C}$  NMR (125 MHz,  $\text{CDCl}_3$ )  $\delta$  133.4, 132.3, 129.4, 122.4.

## General procedure for (*E*)-phenyl(1-phenyl-2-thiocyanatovinyl)selane

### Procedure A

A mixture of alkynes **1a** (0.5 mmol), **2a** (0.3 mmol, 0.6 equiv, 93.6 mg), **3** (0.6 mmol, 1.2 equiv, 58.3 mg),  $\text{K}_2\text{S}_2\text{O}_8$  (1.5 mmol, 3.0 equiv, 405.5 mg) and DCE (1.0 mL) was added successively in a 15.0 mL thick-wall Schlenk tube under air atmosphere. The sealed Schlenk tube was then immersed in an oil bath at 80 °C stirring for 8 h. After completion of the reaction, 3.0 mL of water was added and the mixture was extracted three times with ethyl acetate ( $3 \times 3.0$  mL). The combined organic layer was washed with brine, dried over anhydrous  $\text{Na}_2\text{SO}_4$  and concentrated under reduced pressure. Then, the product **4a** was obtained by flash column chromatography on silica gel (The ratio of eluent is configured according to the TLC developing solvent).

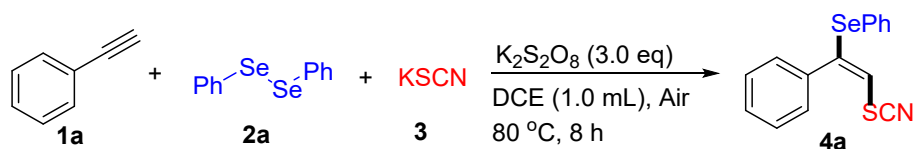

Scheme S5. Synthesis of (*E*)-phenyl(1-phenyl-2-thiocyanatovinyl)selane

### Reaction on 1 mmol Scale

A mixture of alkynes **1a** (1.0 mmol), **2a** (0.6 mmol, 0.6 equiv, 187.2 mg), **3** (1.2 mmol, 1.2 equiv, 116.6 mg),  $\text{K}_2\text{S}_2\text{O}_8$  (3.0 mmol, 3.0 equiv, 811.0 mg), and DCE (1.0 mL) was added successively in a 15.0 mL thick-wall Schlenk tube under air atmosphere. The sealed Schlenk tube was then immersed in an oil bath at 80 °C stirring for 8 h. After completion of the reaction, 3.0 mL of water was added and the mixture was extracted three times with ethyl acetate ( $3 \times 3.0$  mL). The combined organic layer was washed with brine, dried over anhydrous  $\text{Na}_2\text{SO}_4$  and concentrated under reduced pressure. Then, the products **4a** were obtained (244.1 mg, 77%) by flash column chromatography on silica gel (The ratio of eluent is configured according to the TLC developing solvent).

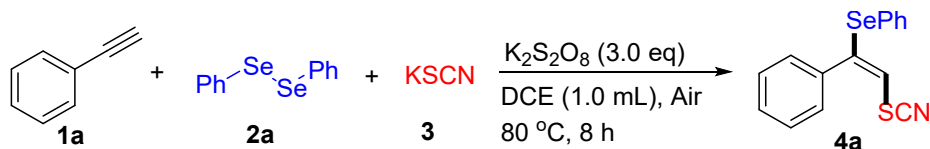

Scheme S5. Synthesis of (*E*)-phenyl(1-phenyl-2-thiocyanatovinyl)selane

## Application:

### Reaction on 0.25 mmol Scale <sup>3</sup>

To a stirred solution of phenylboronic acid (0.3 mmol, 1.2 equiv, 32.7 mg) and **4** (0.25 mmol) in DMF (1.0 mL) was added  $\text{Pd}(\text{PPh}_3)_4$  (20.0 mol%) followed by  $\text{Cu}(\text{OAc})_2$  (1.2 equiv) under air atmosphere at 80 °C for 24 h. After completion of the reaction, 3.0 mL of water was added and the mixture was extracted three times with ethyl acetate ( $3 \times 3.0$  mL). The combined organic layer

was washed with brine, dried over anhydrous Na<sub>2</sub>SO<sub>4</sub> and concentrated under reduced pressure. Then, the product **6** was obtained by flash column chromatography on silica gel.

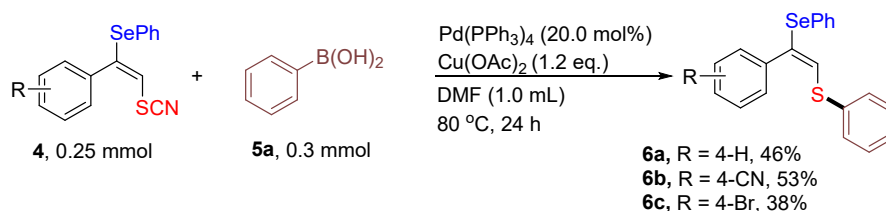

**Scheme S6.** Application of (*E*)-vinyl thiocyanates

### Analytic data of the obtained compounds

(1) (*E*)-phenyl(1-phenyl-2-thiocyanatovinyl)selane (**4a**)

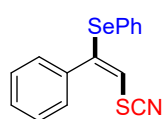

Light yellow oil (144.2 mg, 91%). TLC (petroleum ether/EtOAc = 30:1),  $R_f$  = 0.6. <sup>1</sup>H NMR (500 MHz, CDCl<sub>3</sub>)  $\delta$  7.61 – 7.58 (m, 2H), 7.41 – 7.37 (m, 6H), 7.33 (dd,  $J$  = 7.7, 1.9 Hz, 2H), 5.99 (s, 1H). <sup>13</sup>C NMR (125 MHz, CDCl<sub>3</sub>)  $\delta$  143.8, 135.9, 135.6, 129.8, 129.5, 129.3, 128.8, 128.4, 127.2, 110.8, 107.6.

HRMS (ESI): Calcd. for C<sub>15</sub>H<sub>12</sub>NSSe [M+H]<sup>+</sup>: 317.9846; found: 317.9850.

(2) (*E*)-(1-(4-bromophenyl)-2-thiocyanatovinyl)(phenyl)selane (**4b**)

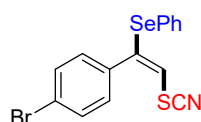

Light yellow oil (181.6 mg, 92%). TLC (petroleum ether/EtOAc = 30:1),  $R_f$  = 0.6. <sup>1</sup>H NMR (500 MHz, CDCl<sub>3</sub>)  $\delta$  7.56 (dt,  $J$  = 6.7, 1.6 Hz, 2H), 7.52 (d,  $J$  = 8.4 Hz, 2H), 7.41 – 7.36 (m, 3H), 7.21 – 7.19 (m, 2H), 6.05 (s, 1H). <sup>13</sup>C NMR (125 MHz, CDCl<sub>3</sub>)  $\delta$  142.6, 135.5, 134.7, 132.0, 130.0, 129.9, 129.5, 126.9,

123.8, 110.3, 108.5. HRMS (ESI): Calcd. for C<sub>15</sub>H<sub>11</sub>BrNSSe [M+H]<sup>+</sup>: 395.8945; found: 395.8955.

(3) (*E*)-(1-(4-fluorophenyl)-2-thiocyanatovinyl)(phenyl)selane (**4c**)

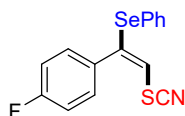

Light yellow oil (120.6 mg, 72%). TLC (petroleum ether/EtOAc = 30:1),  $R_f$  = 0.6. <sup>1</sup>H NMR (500 MHz, CDCl<sub>3</sub>)  $\delta$  7.58 – 7.55 (m, 2H), 7.41 – 7.36 (m, 3H), 7.33 – 7.30 (m, 2H), 7.08 (t,  $J$  = 8.6 Hz, 2H), 6.03 (s, 1H). <sup>13</sup>C NMR (125

MHz, CDCl<sub>3</sub>)  $\delta$  163.0 (d,  $J_{C-F}$  = 250.0 Hz), 142.9, 135.5, 131.8 (d,  $J_{C-F}$  = 2.5 Hz), 130.4 (d,  $J_{C-F}$  = 8.8 Hz), 129.8, 129.4, 127.1, 116.0 (d,  $J_{C-F}$  = 21.3 Hz), 110.5, 108.0. <sup>19</sup>F NMR (471 MHz, CDCl<sub>3</sub>)  $\delta$  -110.47. HRMS (ESI): Calcd. for C<sub>15</sub>H<sub>11</sub>FNSSe [M+H]<sup>+</sup>: 335.9750; found: 335.9756.

(4) (*E*)-4-(1-(phenylselanyl)-2-thiocyanatovinyl)benzonitrile (**4d**)

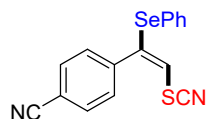

Light yellow oil (159.0 mg, 93%). TLC (petroleum ether/EtOAc = 10:1),  $R_f$  = 0.6. <sup>1</sup>H NMR (500 MHz, CDCl<sub>3</sub>)  $\delta$  7.67 (d,  $J$  = 8.3 Hz, 2H), 7.53 (dt,  $J$  = 6.9, 1.5 Hz, 2H), 7.43 – 7.39 (m, 3H), 7.35 (dd,  $J$  = 8.2, 6.6 Hz, 2H), 6.20 (s, 1H).

<sup>13</sup>C NMR (125 MHz, CDCl<sub>3</sub>)  $\delta$  142.1, 140.6, 135.6, 132.5, 120.0, 129.7, 129.2, 126.5, 118.0, 113.2, 110.0, 109.7. HRMS (ESI): Calcd. for C<sub>16</sub>H<sub>11</sub>N<sub>2</sub>SSe [M+H]<sup>+</sup>: 342.9800; found: 342.9803.

(5) (*E*)-(1-(4-methoxyphenyl)-2-thiocyanatovinyl)(phenyl)selane (**4e**)

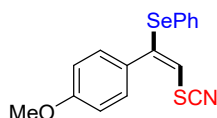

Brown oil (161.4 mg, 93%). TLC (petroleum ether/EtOAc = 30:1),  $R_f$  = 0.6. <sup>1</sup>H NMR (500 MHz, CDCl<sub>3</sub>)  $\delta$  7.50 – 7.47 (m, 2H), 7.28 (dd,  $J$  = 9.1, 5.7 Hz,

3H), 7.22 – 7.19 (m, 2H), 6.84 – 6.81 (m, 2H), 5.87 (s, 1H), 3.75 (s, 3H). <sup>13</sup>C NMR (125 MHz, CDCl<sub>3</sub>) δ 160.4, 143.6, 135.4, 129.9, 129.8, 129.1, 127.9, 127.6, 114.1, 110.9, 106.9, 55.3. HRMS (ESI): Calcd. for C<sub>16</sub>H<sub>14</sub>NOSSe [M+H]<sup>+</sup>: 347.9950; found: 347.9956.

(6) methyl (*E*)-4-(1-(phenylselanyl)-2-thiocyanatovinyl)benzoate (**4f**)

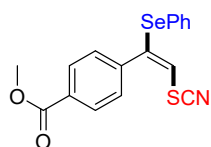

White solid (178.1 mg, 95%, mp: 105-108 °C). TLC (petroleum ether/EtOAc = 30:1), R<sub>f</sub> = 0.6. <sup>1</sup>H NMR (500 MHz, CDCl<sub>3</sub>) δ 8.04 (d, *J* = 8.3 Hz, 2H), 7.57 – 7.54 (m, 2H), 7.40 – 7.34 (m, 5H), 6.13 (s, 1H), 3.94 (s, 3H). <sup>13</sup>C NMR (125 MHz, CDCl<sub>3</sub>) δ 166.2, 142.6, 140.4, 135.5, 130.9, 130.0, 129.9, 129.5, 128.5, 126.8, 110.2, 109.2, 52.3. HRMS (ESI): Calcd. for C<sub>17</sub>H<sub>14</sub>NO<sub>2</sub>SSe [M+H]<sup>+</sup>: 375.9907; found: 375.9905.

(7) (*E*)-2-bromo-1-(4-(trifluoromethyl)phenyl)vinyl trifluoromethanesulfonate (**4g**)

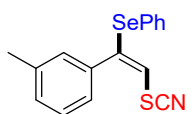

Light yellow oil (155.6 mg, 94%). TLC (petroleum ether/EtOAc = 30:1), R<sub>f</sub> = 0.6. <sup>1</sup>H NMR (500 MHz, CDCl<sub>3</sub>) δ 7.61 – 7.59 (m, 2H), 7.41 – 7.37 (m, 3H), 7.29 (s, 1H), 7.19 (d, *J* = 7.5 Hz, 1H), 7.13 (d, *J* = 9.9 Hz, 2H), 5.90 (s, 1H), 2.38 (s, 3H). <sup>13</sup>C NMR (125 MHz, CDCl<sub>3</sub>) δ 143.9, 138.7, 135.8, 135.7, 130.3, 129.9, 129.4, 128.8, 128.7, 127.3, 125.4, 111.0, 107.0, 21.4. HRMS (ESI): Calcd. for C<sub>16</sub>H<sub>14</sub>NSSe [M+H]<sup>+</sup>: 332.0000; found: 332.0007.

(8) (*E*)-(1-(3-chlorophenyl)-2-thiocyanatovinyl)(phenyl)selane (**4h**)

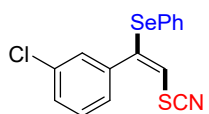

Light yellow oil (143.9 mg, 82%). TLC (petroleum ether/EtOAc = 30:1), R<sub>f</sub> = 0.5. <sup>1</sup>H NMR (500 MHz, CDCl<sub>3</sub>) δ 7.58 (dt, *J* = 6.7, 1.6 Hz, 2H), 7.39 (dd, *J* = 12.1, 7.3 Hz, 3H), 7.33 (dd, *J* = 5.9, 2.3 Hz, 3H), 7.19 (dt, *J* = 6.8, 1.8 Hz, 1H), 6.04 (s, 1H). <sup>13</sup>C NMR (125 MHz, CDCl<sub>3</sub>) δ 142.1, 137.5, 135.6, 134.7, 130.1, 129.9, 129.6, 129.5, 128.4, 126.8, 126.5, 110.3, 108.7. HRMS (ESI): Calcd. for C<sub>15</sub>H<sub>11</sub>ClN<sub>2</sub>SSe [M+H]<sup>+</sup>: 351.9453; found: 351.9460.

(9) (*E*)-(1-(3-fluorophenyl)-2-thiocyanatovinyl)(phenyl)selane (**4i**)

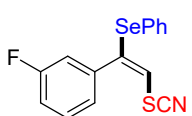

Light yellow oil (77.0 mg, 46%). TLC (petroleum ether/EtOAc = 30:1), R<sub>f</sub> = 0.5. <sup>1</sup>H NMR (500 MHz, CDCl<sub>3</sub>) δ 7.57 (dt, *J* = 6.7, 1.6 Hz, 2H), 7.40 – 7.35 (m, 4H), 7.07 (ddd, *J* = 17.2, 8.2, 1.3 Hz, 3H), 6.07 (s, 1H). <sup>13</sup>C NMR (125 MHz, CDCl<sub>3</sub>) δ 162.6 (d, *J*<sub>C-F</sub> = 247.5 Hz), 142.0, 137.9 (d, *J*<sub>C-F</sub> = 7.5 Hz), 135.6, 130.5 (d, *J*<sub>C-F</sub> = 8.8 Hz), 129.9, 129.5, 126.9, 124.2 (d, *J*<sub>C-F</sub> = 3.8 Hz), 116.5 (d, *J*<sub>C-F</sub> = 21.3 Hz), 115.5 (d, *J*<sub>C-F</sub> = 22.5 Hz), 110.3, 108.9. <sup>19</sup>F NMR (471 MHz, CDCl<sub>3</sub>) δ -111.27. HRMS (ESI): Calcd. for C<sub>15</sub>H<sub>11</sub>FNS<sub>2</sub>Se [M+H]<sup>+</sup>: 335.9751; found: 335.9756.

(10) (*E*)-(1-(2-bromophenyl)-2-thiocyanatovinyl)(phenyl)selane (**4j**)

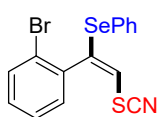

Light yellow oil (77.0 mg, 39%). TLC (petroleum ether/EtOAc = 30:1), R<sub>f</sub> = 0.6. <sup>1</sup>H NMR (500 MHz, CDCl<sub>3</sub>) δ 7.61 – 7.57 (m, 3H), 7.38 (d, *J* = 7.3 Hz, 1H), 7.33 (t, *J* = 7.3 Hz, 2H), 7.28 (d, *J* = 15.0 Hz, 1H), 7.20 – 7.17 (m, 1H), 7.11 (d, *J* = 7.6 Hz, 1H), 6.01 (s, 1H). <sup>13</sup>C NMR (125 MHz, CDCl<sub>3</sub>) δ 143.3, 136.4, 136.4, 133.3, 130.6, 130.0, 129.8, 129.7, 127.7, 126.4, 122.3, 110.3, 109.7. HRMS (ESI): Calcd. for C<sub>15</sub>H<sub>11</sub>BrN<sub>2</sub>SSe [M+H]<sup>+</sup>: 395.8950; found: 395.8955.



(11) (*E*)-(1-(2-methoxyphenyl)-2-thiocyanatovinyl)(phenyl)selane (**4k**)

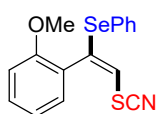

Light yellow oil (140.5 mg, 81%). TLC (petroleum ether/EtOAc = 30:1),  $R_f = 0.5$ .  $^1\text{H NMR}$  (500 MHz,  $\text{CDCl}_3$ )  $\delta$  7.52 (d,  $J = 7.9$  Hz, 2H), 7.33 – 7.28 (m, 3H), 7.22 (d,  $J = 7.3$  Hz, 1H), 6.83 (t,  $J = 7.4$  Hz, 2H), 6.78 (s, 1H), 5.89 (s, 1H), 3.75 (s, 3H).  $^{13}\text{C NMR}$  (125 MHz,  $\text{CDCl}_3$ )  $\delta$  159.7, 143.2, 137.1, 135.6, 129.9, 129.8, 129.3, 127.3, 120.6, 115.4, 113.6, 110.8, 107.8, 55.3. HRMS (ESI): Calcd. for  $\text{C}_{16}\text{H}_{14}\text{NOSse}$   $[\text{M}+\text{H}]^+$ : 347.9952; found: 347.9956.

(12) (*E*)-2-(4-(1-(phenylselenanyl)-2-thiocyanatovinyl)phenyl)acetonitrile (**4l**)

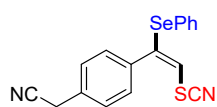

Light yellow oil (133.5 mg, 75%). TLC (petroleum ether/EtOAc = 10:1),  $R_f = 0.6$ .  $^1\text{H NMR}$  (500 MHz,  $\text{CDCl}_3$ )  $\delta$  7.58 – 7.56 (m, 2H), 7.40 – 7.37 (m, 2H), 7.36 (d,  $J = 3.6$  Hz, 5H), 6.05 (s, 1H), 3.78 (s, 2H).  $^{13}\text{C NMR}$  (125 MHz,  $\text{CDCl}_3$ )  $\delta$  143.0, 135.9, 135.5, 131.3, 129.9, 129.4, 129.2, 128.4, 127.0, 117.2, 110.4, 108.3, 23.4. HRMS (ESI): Calcd. for  $\text{C}_{17}\text{H}_{13}\text{N}_2\text{Sse}$   $[\text{M}+\text{H}]^+$ : 356.9952; found: 356.9959.

(13) (*E*)-(1-(3,5-difluorophenyl)-2-thiocyanatovinyl)(phenyl)selane (**4m**)

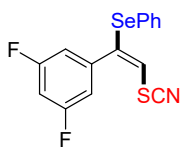

Light yellow oil (98.8 mg, 56%). TLC (petroleum ether/EtOAc = 30:1),  $R_f = 0.6$ .  $^1\text{H NMR}$  (500 MHz,  $\text{CDCl}_3$ )  $\delta$  7.57 – 7.55 (m, 2H), 7.42 – 7.36 (m, 3H), 6.87 – 6.80 (m, 3H), 6.11 (s, 1H).  $^{13}\text{C NMR}$  (125 MHz,  $\text{CDCl}_3$ )  $\delta$  163.9 (d,  $J_{\text{C-F}} = 12.5$  Hz), 161.9 (d,  $J_{\text{C-F}} = 12.5$  Hz), 140.7 (t,  $J_{\text{C-F}} = 2.5$  Hz), 138.9 (t,  $J_{\text{C-F}} = 10.0$  Hz), 135.6, 130.0, 129.6, 126.5, 111.7 (d,  $J_{\text{C-F}} = 7.5$  Hz), 111.6 (d,  $J_{\text{C-F}} = 7.5$  Hz), 109.9, 109.9, 105.0 (t,  $J_{\text{C-F}} = 25.0$  Hz).  $^{19}\text{F NMR}$  (471 MHz,  $\text{CDCl}_3$ )  $\delta$  -107.65. HRMS (ESI): Calcd. for  $\text{C}_{15}\text{H}_{10}\text{F}_2\text{Nss}$   $[\text{M}+\text{H}]^+$ : 353.9655; found: 353.9662.

(14) (*E*)-(1-(4-ethynylphenyl)-2-thiocyanatovinyl)(phenyl)selane (**4n**)

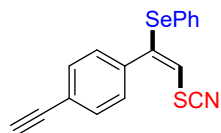

Light yellow oil (59.7 mg, 35%). TLC (petroleum ether/EtOAc = 30:1),  $R_f = 0.6$ .  $^1\text{H NMR}$  (500 MHz,  $\text{CDCl}_3$ )  $\delta$  7.50 – 7.47 (m, 2H), 7.44 – 7.41 (m, 2H), 7.30 (td,  $J = 6.3, 5.6, 4.7$  Hz, 3H), 7.23 – 7.21 (m, 2H), 6.00 (s, 1H), 3.10 (s, 1H).  $^{13}\text{C NMR}$  (125 MHz,  $\text{CDCl}_3$ )  $\delta$  142.8, 136.2, 135.5, 132.5, 129.8, 129.4, 128.4, 127.0, 123.3, 110.4, 108.6, 82.7, 78.8. HRMS (ESI): Calcd. for  $\text{C}_{17}\text{H}_{12}\text{Nss}$   $[\text{M}+\text{H}]^+$ : 341.9839; found: 341.9850.

(15) (*E*)-3-(1-(phenylselenanyl)-2-thiocyanatovinyl)pyridine (**4o**)

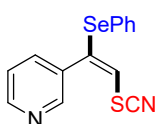

Light yellow oil (147.9 mg, 93%). TLC (petroleum ether/EtOAc = 10:1),  $R_f = 0.5$ .  $^1\text{H NMR}$  (500 MHz,  $\text{CDCl}_3$ )  $\delta$  8.57 (d,  $J = 20.1$  Hz, 2H), 7.67 (d,  $J = 7.9$  Hz, 1H), 7.56 (d,  $J = 6.7$  Hz, 2H), 7.40 – 7.34 (m, 4H), 6.20 (s, 1H).  $^{13}\text{C NMR}$  (125 MHz,  $\text{CDCl}_3$ )  $\delta$  150.3, 148.9, 140.7, 136.1, 135.6, 132.2, 130.0, 129.9, 129.6, 126.6, 123.5, 109.9. HRMS (ESI): Calcd. for  $\text{C}_{14}\text{H}_{11}\text{N}_2\text{Sse}$   $[\text{M}+\text{H}]^+$ : 318.9799; found: 318.9803.

(16) (*E*)-2-(1-(phenylselenanyl)-2-thiocyanatovinyl)thiophene (**4p**)

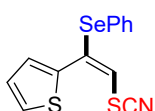

Brown oil (148.5 mg, 92%). TLC (petroleum ether/EtOAc = 30:1),  $R_f = 0.6$ .  $^1\text{H NMR}$  (500 MHz,  $\text{CDCl}_3$ )  $\delta$  7.67 – 7.64 (m, 2H), 7.55 (dd,  $J = 5.0, 1.2$  Hz,

1H), 7.45 (d,  $J = 5.9$  Hz, 3H), 7.32 (d,  $J = 3.7$  Hz, 1H), 7.16 – 7.14 (m, 1H), 6.32 (s, 1H).  $^{13}\text{C}$  NMR (125 MHz,  $\text{CDCl}_3$ )  $\delta$  138.1, 134.4, 132.9, 129.8, 129.6, 129.0, 128.8, 128.4, 127.6, 110.5, 110.3. HRMS (ESI): Calcd. for  $\text{C}_{13}\text{H}_{10}\text{NS}_2\text{Se}$   $[\text{M}+\text{H}]^+$ : 323.9409; found: 323.9414.

(17) (*E*)-3-(1-(phenylselanyl)-2-thiocyanatovinyl)thiophene (**4q**)

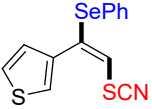 Light yellow oil (145.3 mg, 90%). TLC (petroleum ether/EtOAc = 30:1),  $R_f = 0.6$ .  $^1\text{H}$  NMR (500 MHz,  $\text{CDCl}_3$ )  $\delta$  7.58 – 7.55 (m, 2H), 7.40 – 7.35 (m, 5H), 7.18 (dd,  $J = 5.0, 1.4$  Hz, 1H), 6.02 (s, 1H).  $^{13}\text{C}$  NMR (125 MHz,  $\text{CDCl}_3$ )  $\delta$  137.0, 136.1, 135.1, 129.8, 129.2, 127.6, 127.4, 126.7, 126.3, 110.7, 108.2. HRMS (ESI): Calcd. for  $\text{C}_{13}\text{H}_{10}\text{NS}_2\text{Se}$   $[\text{M}+\text{H}]^+$ : 323.9410; found: 323.9414.

(18) (*E*)-2,2,2-trifluoro-*N*-(2-(phenylselanyl)-3-thiocyanatoallyl)acetamide (**4r**)

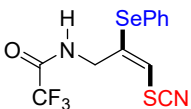 Light yellow oil (144.6 mg, 79%). TLC (petroleum ether/EtOAc = 10:1),  $R_f = 0.5$ .  $^1\text{H}$  NMR (500 MHz,  $\text{CDCl}_3$ )  $\delta$  7.57 (dt,  $J = 6.7, 1.6$  Hz, 2H), 7.46 – 7.40 (m, 3H), 6.70 (s, 1H), 6.28 (s, 1H), 4.30 (d,  $J = 5.9$  Hz, 2H).  $^{13}\text{C}$  NMR (125 MHz,  $\text{CDCl}_3$ )  $\delta$  157.3 (q,  $J_{\text{C-F}} = 37.5$  Hz), 140.0, 135.1, 130.2, 129.7, 125.7, 115.4 (q,  $J_{\text{C-F}} = 285.0$  Hz), 113.8, 109.6, 41.4.  $^{19}\text{F}$  NMR (471 MHz,  $\text{CDCl}_3$ )  $\delta$  -75.70. HRMS (ESI): Calcd. for  $\text{C}_{12}\text{H}_{10}\text{F}_3\text{N}_2\text{OSse}$   $[\text{M}+\text{H}]^+$ : 366.9621; found: 366.9626.

(19) (*E*)-(3,3-diethoxy-1-thiocyanatoprop-1-en-2-yl)(phenyl)selane (**4s**)

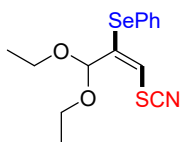 Light yellow oil (42.9 mg, 25%). TLC (petroleum ether/EtOAc = 30:1),  $R_f = 0.6$ .  $^1\text{H}$  NMR (500 MHz,  $\text{CDCl}_3$ )  $\delta$  7.64 – 7.58 (m, 2H), 7.45 – 7.38 (m, 3H), 5.80 (s, 1H), 5.21 (s, 1H), 3.70 – 3.63 (m, 2H), 3.62 – 3.55 (m, 2H), 1.26 (t,  $J = 7.1$  Hz, 6H).  $^{13}\text{C}$  NMR (125 MHz,  $\text{CDCl}_3$ )  $\delta$  160.6, 137.6, 135.8, 129.9, 129.3, 126.6, 112.2, 100.3, 61.9, 15.0. HRMS (ESI): Calcd. for  $\text{C}_{14}\text{H}_{18}\text{NO}_2\text{Sse}$   $[\text{M}+\text{H}]^+$ : 344.0207; found: 344.0218.

(20) (*E*)-phenyl(1-phenyl-2-thiocyanatobut-1-en-1-yl)selane (**4t**)

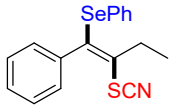 Light yellow oil (163.9 mg, 95%). TLC (petroleum ether/EtOAc = 30:1),  $R_f = 0.6$ .  $^1\text{H}$  NMR (500 MHz,  $\text{CDCl}_3$ )  $\delta$  7.29 (dd,  $J = 8.1, 1.4$  Hz, 2H), 7.22 – 7.18 (m, 4H), 7.13 (t,  $J = 7.6$  Hz, 2H), 7.01 (dd,  $J = 7.2, 2.4$  Hz, 2H), 3.08 (q,  $J = 7.4$  Hz, 2H), 1.43 (t,  $J = 7.4$  Hz, 3H).  $^{13}\text{C}$  NMR (125 MHz,  $\text{CDCl}_3$ )  $\delta$  138.2, 137.3, 135.4, 129.0, 128.8, 128.3, 128.2, 128.1, 128.0, 126.3, 110.5, 30.6, 13.0. HRMS (ESI): Calcd. for  $\text{C}_{17}\text{H}_{16}\text{NSe}$   $[\text{M}+\text{H}]^+$ : 346.0158; found: 346.0163.

(21) (*E*)-phenyl(6-thiocyanatodec-5-en-5-yl)selane (**4u**)

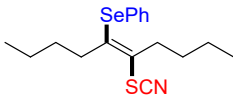 Light yellow oil (158.9 mg, 90%). TLC (petroleum ether/EtOAc = 30:1),  $R_f = 0.6$ .  $^1\text{H}$  NMR (500 MHz,  $\text{CDCl}_3$ )  $\delta$  7.46 (dd,  $J = 7.9, 1.8$  Hz, 2H), 7.29 (d,  $J = 7.1$  Hz, 3H), 2.84 – 2.79 (m, 2H), 2.37 – 2.31 (m, 2H), 1.60 (t,  $J = 7.7$  Hz, 2H), 1.41 – 1.34 (m, 4H), 1.18 – 1.10 (m, 2H), 0.95 (t,  $J = 7.4$  Hz, 3H), 0.77 (t,  $J = 7.3$  Hz, 3H).  $^{13}\text{C}$  NMR (125 MHz,  $\text{CDCl}_3$ )  $\delta$  141.6, 134.5, 129.3, 128.4, 128.3, 123.3, 110.4, 37.2, 35.7, 30.8, 30.3, 22.0, 22.0, 13.9, 13.7. HRMS (ESI): Calcd. for  $\text{C}_{17}\text{H}_{24}\text{NSe}$   $[\text{M}+\text{H}]^+$ : 354.0781; found: 354.0789.

(22) (*E*)-(4-chlorophenyl)(1-phenyl-2-thiocyanatovinyl)selane (**4v**)

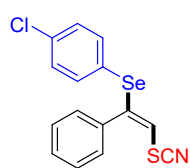

Light yellow oil (66.7 mg, 38%). TLC (petroleum ether/EtOAc = 30:1),  $R_f$  = 0.6.  $^1\text{H}$  NMR (500 MHz,  $\text{CDCl}_3$ )  $\delta$  7.49 – 7.47 (m, 2H), 7.40 – 7.38 (m, 3H), 7.31 (dd,  $J$  = 8.2, 1.7 Hz, 4H), 6.12 (s, 1H).  $^{13}\text{C}$  NMR (125 MHz,  $\text{CDCl}_3$ )  $\delta$  142.7, 136.7, 135.7, 135.5, 130.0, 129.7, 128.9, 128.4, 125.5, 110.6, 109.0. HRMS (ESI): Calcd. for  $\text{C}_{15}\text{H}_{11}\text{ClNSe}$   $[\text{M}+\text{H}]^+$ : 351.9452; found: 351.9460.

(23) (*E*)-(1-phenyl-2-thiocyanatovinyl)(p-tolyl)selane (**4w**)

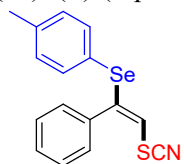

Light yellow oil (153.9 mg, 93%). TLC (petroleum ether/EtOAc = 30:1),  $R_f$  = 0.6.  $^1\text{H}$  NMR (500 MHz,  $\text{CDCl}_3$ )  $\delta$  7.50 (d,  $J$  = 7.9 Hz, 2H), 7.41 (d,  $J$  = 7.1 Hz, 3H), 7.34 (d,  $J$  = 7.9 Hz, 2H), 7.20 (d,  $J$  = 7.7 Hz, 2H), 5.83 (s, 1H), 2.39 (s, 3H).  $^{13}\text{C}$  NMR (125 MHz,  $\text{CDCl}_3$ )  $\delta$  144.7, 139.8, 136.0, 135.9, 130.8, 129.5, 128.8, 128.3, 123.4, 111.0, 106.0, 21.3. HRMS (ESI): Calcd. for  $\text{C}_{16}\text{H}_{14}\text{NSe}$   $[\text{M}+\text{H}]^+$ : 332.0001; found: 332.0007.

(24) (*E*)-3-(1-((4-bromophenyl)selanyl)-2-thiocyanatovinyl)pyridine (**4x**)

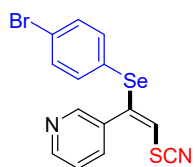

Light yellow oil (51.5 mg, 26%). TLC (petroleum ether/EtOAc = 10:1),  $R_f$  = 0.6.  $^1\text{H}$  NMR (500 MHz,  $\text{CDCl}_3$ )  $\delta$  8.70 (s, 1H), 8.55 – 8.48 (m, 1H), 7.75 (dt,  $J$  = 8.1, 1.9 Hz, 1H), 7.34 – 7.30 (m, 2H), 7.24 (dd,  $J$  = 8.1, 4.8 Hz, 1H), 7.20 – 7.16 (m, 2H), 7.03 (s, 1H).  $^{13}\text{C}$  NMR (125 MHz,  $\text{CDCl}_3$ )  $\delta$  150.0, 148.2, 135.0, 134.1, 133.8, 133.7, 132.8, 126.4, 125.2, 123.4, 122.8, 110.0. HRMS (ESI): Calcd. for  $\text{C}_{14}\text{H}_{10}\text{BrN}_2\text{SSe}$   $[\text{M}+\text{H}]^+$ : 396.8901; found: 396.8908.

(25) (*E*)-(1-(4-bromophenyl)-2-thiocyanatovinyl)(methyl)selane (**4y**)

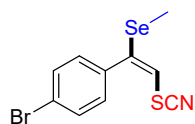

Yellow solid (136.5 mg, 82%, mp: 115-117 °C). TLC (petroleum ether/EtOAc = 30:1),  $R_f$  = 0.6.  $^1\text{H}$  NMR (500 MHz,  $\text{CDCl}_3$ )  $\delta$  7.59 – 7.57 (m, 2H), 7.21 – 7.19 (m, 2H), 6.13 (s, 1H), 2.18 (s, 3H).  $^{13}\text{C}$  NMR (125 MHz,  $\text{CDCl}_3$ )  $\delta$  142.8, 135.0, 132.2, 129.9, 123.8, 110.6, 105.2, 7.9. HRMS (ESI): Calcd. for  $\text{C}_{10}\text{H}_9\text{BrNSe}$   $[\text{M}+\text{H}]^+$ : 333.8794; found: 333.8799.

(26) (*E*)-(1-(2-bromophenyl)-2-thiocyanatovinyl)(methyl)selane (**4z**)

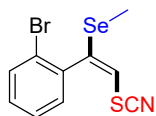

Light yellow oil (111.5 mg, 67%). TLC (petroleum ether/EtOAc = 30:1),  $R_f$  = 0.5.  $^1\text{H}$  NMR (500 MHz,  $\text{CDCl}_3$ )  $\delta$  7.66 (d,  $J$  = 8.0 Hz, 1H), 7.41 (t,  $J$  = 7.5 Hz, 1H), 7.27 (ddd,  $J$  = 18.7, 7.6, 1.7 Hz, 2H), 6.22 (s, 1H), 2.20 (s, 3H).  $^{13}\text{C}$  NMR (125 MHz,  $\text{CDCl}_3$ )  $\delta$  142.6, 136.7, 133.3, 130.7, 130.0, 127.9, 122.2, 110.4, 107.5, 7.5. HRMS (ESI): Calcd. for  $\text{C}_{10}\text{H}_9\text{BrNSe}$   $[\text{M}+\text{H}]^+$ : 333.8792; found: 333.8799.

(27) (*E*)-3-(1-(methylselanyl)-2-thiocyanatovinyl)pyridine (**4aa**)

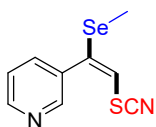

Light yellow oil (34.6 mg, 27%). TLC (petroleum ether/EtOAc = 10:1),  $R_f$  = 0.5.  $^1\text{H}$  NMR (500 MHz,  $\text{CDCl}_3$ )  $\delta$  8.66 (s, 1H), 8.57 (s, 1H), 7.68 (dt,  $J$  = 8.0, 2.0 Hz, 1H), 7.40 (dd,  $J$  = 7.9, 4.8 Hz, 1H), 6.21 (s, 1H), 2.22 (s, 3H).  $^{13}\text{C}$  NMR (125 MHz,  $\text{CDCl}_3$ )  $\delta$  150.5, 148.8, 140.9, 136.0, 132.4, 123.6, 110.2, 106.3, 8.0. HRMS (ESI): Calcd. for  $\text{C}_9\text{H}_9\text{N}_2\text{SSe}$   $[\text{M}+\text{H}]^+$ : 256.9641; found: 256.9646.

(28) (*E*)-benzyl(1-phenyl-2-thiocyanatovinyl)selane (**4ab**)

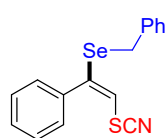

Light yellow oil (41.4 mg, 25%). TLC (petroleum ether/EtOAc = 30:1),  $R_f$  = 0.5.  $^1\text{H}$  NMR (500 MHz,  $\text{CDCl}_3$ )  $\delta$  7.49 – 7.46 (m, 2H), 7.45 – 7.39 (m, 3H), 7.38 – 7.34 (m, 2H), 7.34 – 7.29 (m, 3H), 7.28 (s, 1H), 4.05 (s, 2H).  $^{13}\text{C}$  NMR (125 MHz,  $\text{CDCl}_3$ )  $\delta$  137.2, 135.9, 130.7, 129.5, 129.0, 128.9, 128.8, 128.5, 127.5, 119.7, 110.4, 31.5. HRMS (ESI): Calcd. for  $\text{C}_{16}\text{H}_{14}\text{NNSe}$   $[\text{M}+\text{H}]^+$ : 332.0002; found: 332.0007.

(29) (1*R*,2*S*,4*R*)-4,7,7-trimethylbicyclo[2.2.1]heptan-2-yl 4-((*E*)-1-(phenylselanyl)-2-thiocyanatovinyl)benzoate (**4ac**)

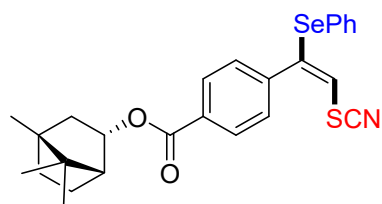

Light yellow oil (161.6 mg, 65%). TLC (petroleum ether/EtOAc = 10:1),  $R_f$  = 0.5.  $^1\text{H}$  NMR (500 MHz,  $\text{CDCl}_3$ )  $\delta$  8.09 – 8.05 (m, 2H), 7.57 (dd,  $J$  = 6.6, 1.7 Hz, 2H), 7.42 – 7.36 (m, 5H), 6.11 (s, 1H), 5.13 (d,  $J$  = 8.6 Hz, 1H), 2.49 (d,  $J$  = 4.0 Hz, 1H), 2.12 (t,  $J$  = 9.0 Hz, 1H), 1.84 – 1.75 (m, 2H), 1.43 (s, 1H), 1.35 (s, 1H), 1.12 (s, 1H), 0.98 (s, 3H), 0.93 (d,  $J$  = 3.6 Hz, 6H).  $^{13}\text{C}$  NMR (125 MHz,  $\text{CDCl}_3$ )  $\delta$  165.9, 142.7, 140.2, 135.5, 131.7, 129.9, 129.9, 129.5, 128.4, 126.9, 110.3, 109.1, 81.0, 49.1, 47.9, 44.9, 36.8, 28.0, 27.3, 19.7, 18.9, 13.6. HRMS (ESI): Calcd. for  $\text{C}_{26}\text{H}_{28}\text{NO}_2\text{SSe}$   $[\text{M}+\text{H}]^+$ : 498.0994; found: 498.1000.

(30) (1*S*,2*R*,5*S*)-2-isopropyl-5-methylcyclohexyl 4-((*E*)-1-(phenylselanyl)-2-thiocyanatovinyl)benzoate (**4ad**)

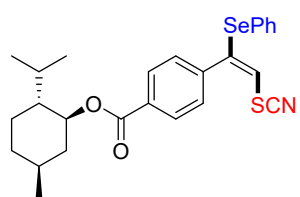

Light yellow oil (132.3 mg, 53%). TLC (petroleum ether/EtOAc = 10:1),  $R_f$  = 0.6.  $^1\text{H}$  NMR (500 MHz,  $\text{CDCl}_3$ )  $\delta$  8.06 (d,  $J$  = 8.2 Hz, 2H), 7.58 (d,  $J$  = 6.5 Hz, 2H), 7.39 (dd,  $J$  = 11.4, 7.9 Hz, 5H), 6.09 (s, 1H), 4.96 (d,  $J$  = 4.4 Hz, 1H), 2.13 (dd,  $J$  = 12.0, 3.1 Hz, 1H), 2.01 – 1.94 (m, 1H), 1.76 (d,  $J$  = 11.9 Hz, 2H), 1.57 (s, 2H), 1.12 (d,  $J$  = 11.5 Hz, 2H), 0.95 (dd,  $J$  = 6.8, 3.3 Hz, 7H), 0.82 (d,  $J$  = 6.9 Hz, 3H).  $^{13}\text{C}$  NMR (125 MHz,  $\text{CDCl}_3$ )  $\delta$  165.2, 142.7, 140.2, 135.5, 131.6, 130.0, 129.9, 129.5, 128.4, 126.9, 110.3, 109.0, 75.2, 47.2, 40.9, 34.2, 31.4, 26.4, 23.5, 22.0, 20.8, 16.4. HRMS (ESI): Calcd. for  $\text{C}_{26}\text{H}_{30}\text{NO}_2\text{SSe}$   $[\text{M}+\text{H}]^+$ : 500.1148; found: 500.1157.

(31) (*E*)-phenyl(1-phenyl-2-thiocyanatovinyl-2-d)selane (**4a-D**)

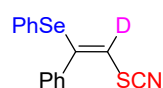

Light yellow oil (111.3 mg, 70%). TLC (petroleum ether/EtOAc = 30:1),  $R_f$  = 0.6.  $^1\text{H}$  NMR (500 MHz,  $\text{CDCl}_3$ )  $\delta$  7.61 – 7.57 (m, 2H), 7.42 – 7.36 (m, 6H), 7.34 – 7.32 (m, 2H), 5.98 (s, 0.3H).  $^2\text{H}$  NMR (77 MHz, DCM)  $\delta$  5.98 (s).  $^{13}\text{C}$  NMR (125 MHz,  $\text{CDCl}_3$ )  $\delta$  143.8, 135.9, 135.6, 129.8, 129.5, 129.3, 128.8, 128.4, 127.2, 110.8, 107.5.

(32) (*E*)-phenyl(2-phenyl-2-(phenylselanyl)vinyl)sulfane (**6a**)<sup>4</sup>

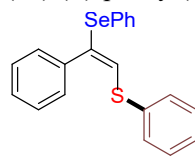

Light yellow oil (42.3 mg, 46%). TLC (petroleum ether/EtOAc = 40:1),  $R_f$  = 0.6.  $^1\text{H}$  NMR (500 MHz,  $\text{CDCl}_3$ )  $\delta$  7.52 (dd,  $J$  = 20.7, 6.9 Hz, 4H), 7.32 (dd,  $J$  = 11.9, 7.4 Hz, 6H), 7.27 – 7.22 (m, 5H), 6.88 (s, 1H).  $^{13}\text{C}$  NMR (125 MHz,  $\text{CDCl}_3$ )  $\delta$  138.5, 135.8, 132.9, 130.6, 129.7, 129.3, 129.2, 129.2, 129.1, 129.0, 128.2, 128.1, 127.4, 126.9.

(33) (*E*)-4-(1-(phenylselanyl)-2-(phenylthio)vinyl)benzonitrile (**6b**)<sup>4</sup>

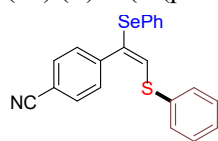

Orange oil (52.1 mg, 53%). TLC (petroleum ether/EtOAc = 30:1),  $R_f = 0.6$ .  $^1\text{H NMR}$  (500 MHz,  $\text{CDCl}_3$ )  $\delta$  7.64 – 7.59 (m, 4H), 7.44 (s, 3H), 7.36 (d,  $J = 6.4$  Hz, 4H), 7.25 – 7.23 (m, 3H), 7.13 (s, 1H).  $^{13}\text{C NMR}$  (125 MHz,  $\text{CDCl}_3$ )  $\delta$  143.4, 134.6, 133.3, 132.7, 132.0, 130.0, 129.9, 129.8, 129.3, 129.3, 127.7, 127.6, 126.6, 118.7, 111.3.

(34) (*E*)-(2-(4-bromophenyl)-2-(phenylselanyl)vinyl)(phenyl)sulfane (**6c**)<sup>4</sup>

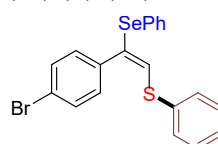

Light yellow oil (42.4 mg, 38%). TLC (petroleum ether),  $R_f = 0.6$ .  $^1\text{H NMR}$  (500 MHz,  $\text{CDCl}_3$ )  $\delta$  7.69 – 7.65 (m, 2H), 7.56 (s, 1H), 7.43 (s, 2H), 7.41 – 7.35 (m, 6H), 7.26 (s, 1H), 7.23 (t,  $J = 7.7$  Hz, 2H), 7.15 (t,  $J = 7.2$  Hz, 1H).  $^{13}\text{C NMR}$  (125 MHz,  $\text{CDCl}_3$ )  $\delta$  137.8, 136.5, 133.9, 133.4, 131.5, 131.1, 130.5, 129.5, 129.0, 128.4, 128.2, 128.1, 126.3, 121.5.

(35) (2,2-diphenylvinyl)(phenyl)selane (**8**)<sup>4</sup>

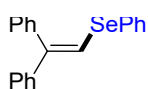

Light yellow oil (64.7 mg, 77%). TLC (petroleum ether),  $R_f = 0.6$ .  $^1\text{H NMR}$  (500 MHz,  $\text{CDCl}_3$ )  $\delta$  7.69 (d,  $J = 7.2$  Hz, 2H), 7.52 (t,  $J = 7.0$  Hz, 2H), 7.47 (d,  $J = 7.6$  Hz, 3H), 7.37 (dd,  $J = 16.3, 6.4$  Hz, 8H), 7.25 (s, 1H).  $^{13}\text{C NMR}$  (125 MHz,  $\text{CDCl}_3$ )  $\delta$  143.0, 141.5, 140.3, 132.4, 131.5, 129.3, 129.2, 128.5, 128.2, 127.9, 127.3, 127.2, 127.1, 122.5.

## Crystal data of 4f

### Crystallographic data of compound 4f

**Experimental:** Single crystals of  $\text{C}_{17}\text{H}_{13}\text{NO}_2\text{SSe}$  (**4f**) were generated in the mixed solution of dichloromethane and n-hexane (1:1). X-Ray diffraction data of one of these crystals were collected on a R-Axis SPIDER diffractometer. The measurements were performed with Mo- $K\alpha$  radiation ( $\lambda = 0.71073$  Å). Data were collected at 296 K, using the  $\omega$  - and  $\phi$  - scans to a maximum  $\theta$  value of 25.025°. The data were refined by full-matrix least-squares techniques on F2 with SHELXTL-2014. And the structures were solved by direct methods SHELXS-2014. All the non-hydrogen atoms were refined anisotropically. The hydrogen atoms were included at geometrically idealized positions. X-ray crystallographic structures for **4f** ORTEP representation with 50% probability thermal ellipsoids. Crystal data have been deposited to CCDC, number 2341428.

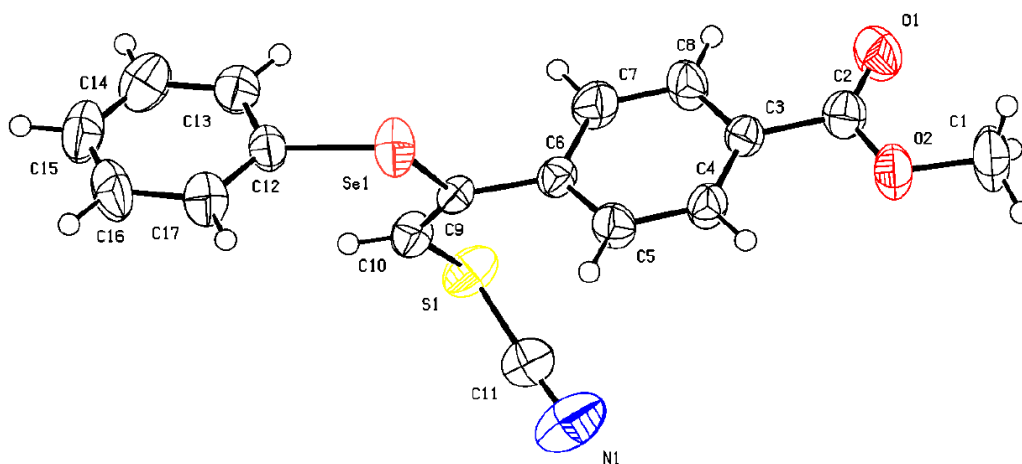

**Scheme S7** X-ray crystallographic structures of **4f** with thermal ellipsoids at 50% probability.

**Table S1** Crystal data and structure refinement for **4f**

| Identification code                  | <b>4f</b>                                                                               |
|--------------------------------------|-----------------------------------------------------------------------------------------|
| Empirical formula                    | C <sub>17</sub> H <sub>13</sub> NO <sub>2</sub> SSe                                     |
| Formula weight                       | 374.30                                                                                  |
| Temperature                          | 296.15 K                                                                                |
| Wavelength                           | 0.71073 Å                                                                               |
| Crystal system                       | monoclinic                                                                              |
| Space group                          | P2 <sub>1</sub> /n                                                                      |
| Unit cell dimensions                 | a = 5.852 Å      a = 90°.<br>b = 19.044 Å     b = 101.05°.<br>c = 14.544 Å     g = 90°. |
| Volume                               | 1590.7 Å <sup>3</sup>                                                                   |
| Z                                    | 4                                                                                       |
| Density (calculated)                 | 1.563 Mg/m <sup>3</sup>                                                                 |
| Absorption coefficient               | 2.497 mm <sup>-1</sup>                                                                  |
| F(000)                               | 752.0                                                                                   |
| Crystal size                         | 0.22x 0.2 x 0.18 mm <sup>3</sup>                                                        |
| Radiation                            | MoK $\alpha$ ( $\lambda$ = 0.71073)                                                     |
| 2 $\theta$ range for data collection | 4.278 to 50.128°                                                                        |
| Index ranges                         | -6 ≤ h ≤ 6, -22 ≤ k ≤ 22, 0 ≤ l ≤ 17                                                    |
| Reflections collected                | 5133                                                                                    |
| Independent reflections              | 2799 [Rint = 0.0567, Rsigma = 0.0895]                                                   |
| Data / restraints / parameters       | 2799 / 0 / 200                                                                          |
| Goodness-of-fit on F <sup>2</sup>    | 0.989                                                                                   |
| Final R indices [I > 2sigma(I)]      | R1 = 0.0404, wR2 = 0.0865                                                               |
| Final R indices (all data)           | R1 = 0.0935, wR2 = 0.1214                                                               |
| Largest diff. peak and hole          | 0.29 and -0.33 e.Å <sup>-3</sup>                                                        |

## NMR spectra of the obtained compounds

**Figure S1.** The  $^1\text{H}$  (500 MHz),  $^{13}\text{C}$  (125 MHz) NMR spectrum for (*E*)-phenyl(1-phenyl-2-thiocyanatovinyl)selane (**4a**) in  $\text{CDCl}_3$ .

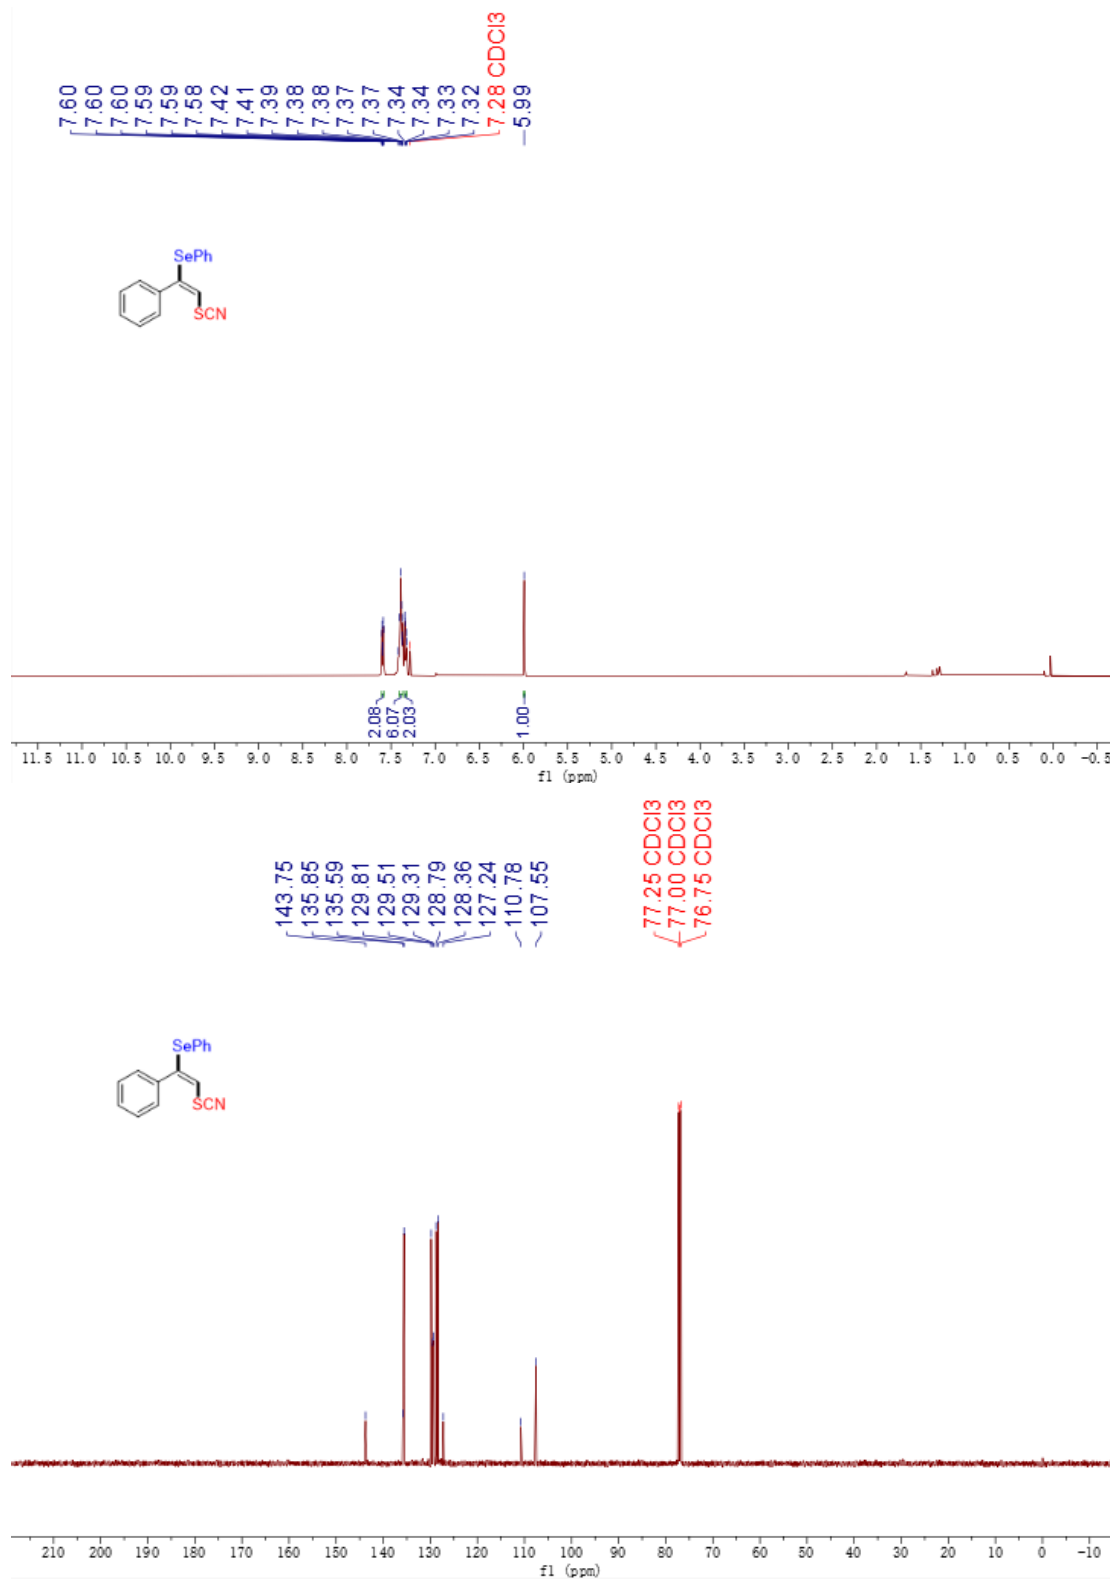

**Figure S2.** The  $^1\text{H}$  (500 MHz),  $^{13}\text{C}$  (125 MHz) NMR spectrum for (*E*)-(1-(4-bromophenyl)-2-thiocyanatovinyl)(phenyl)selane (**4b**) in  $\text{CDCl}_3$ .

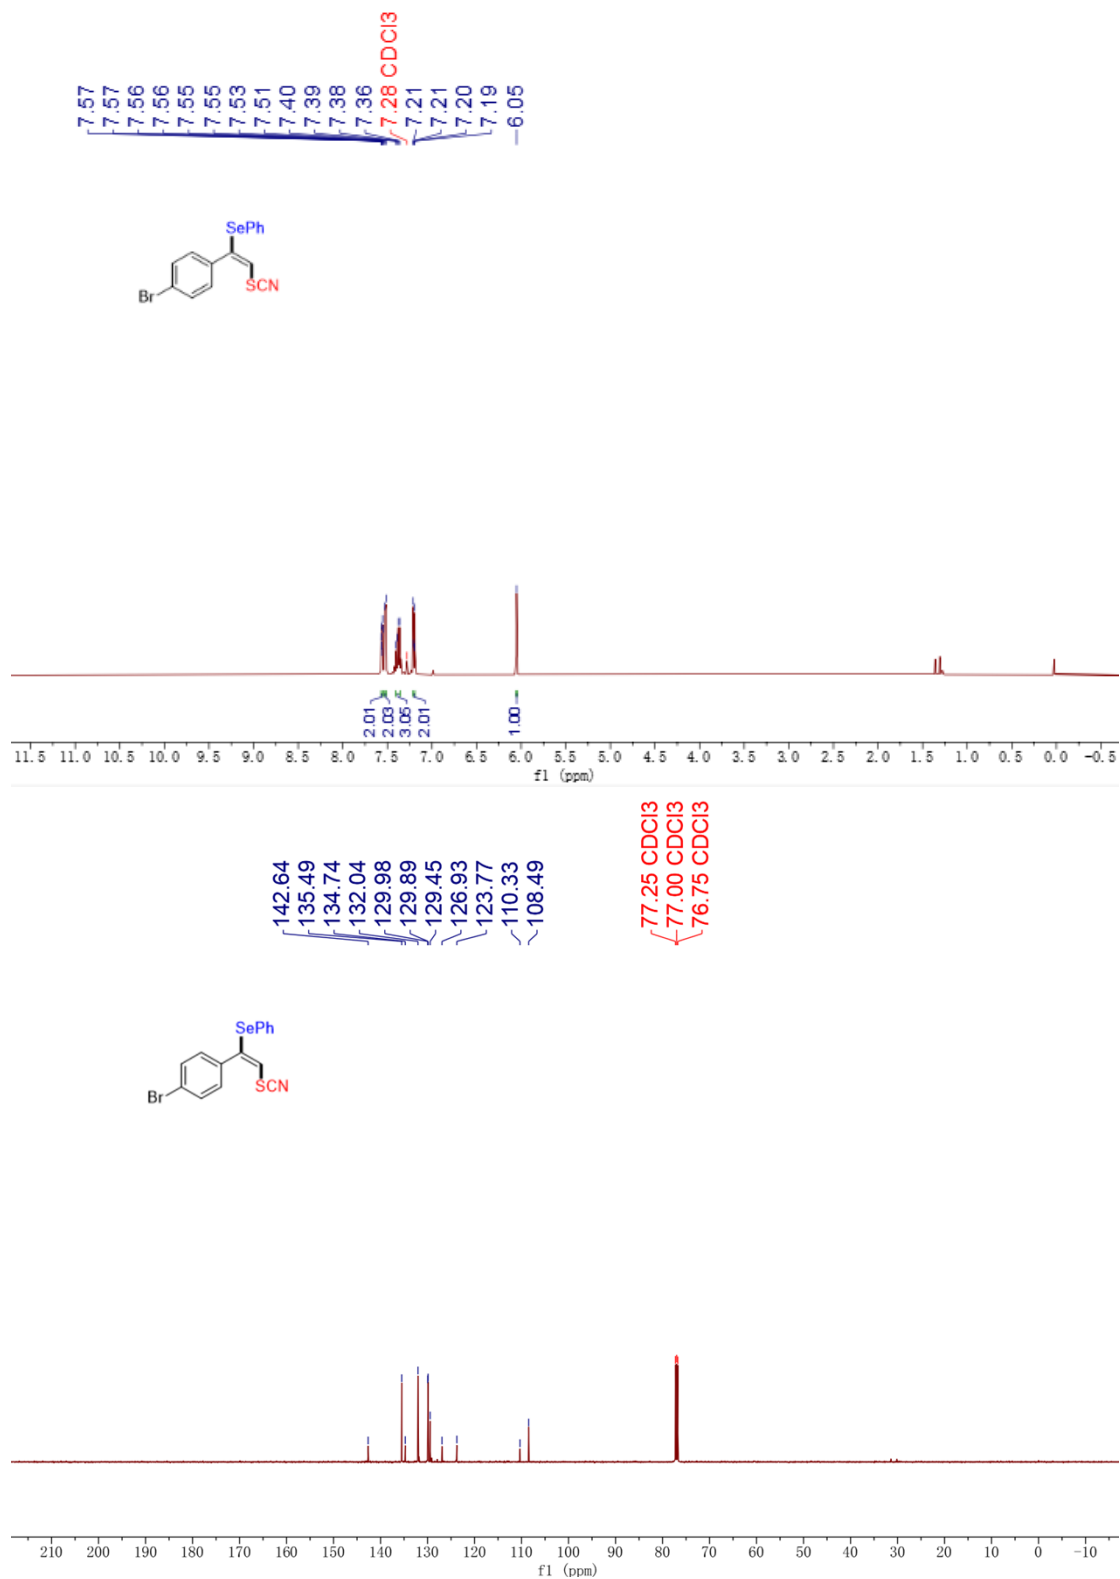



**Figure S3.** The  $^1\text{H}$  (500 MHz),  $^{13}\text{C}$  (125 MHz) and  $^{19}\text{F}$  (471 MHz) NMR spectrum for (*E*)-(1-(4-fluorophenyl)-2-thiocyanatovinyl)(phenyl)selane (**4c**) in  $\text{CDCl}_3$ .

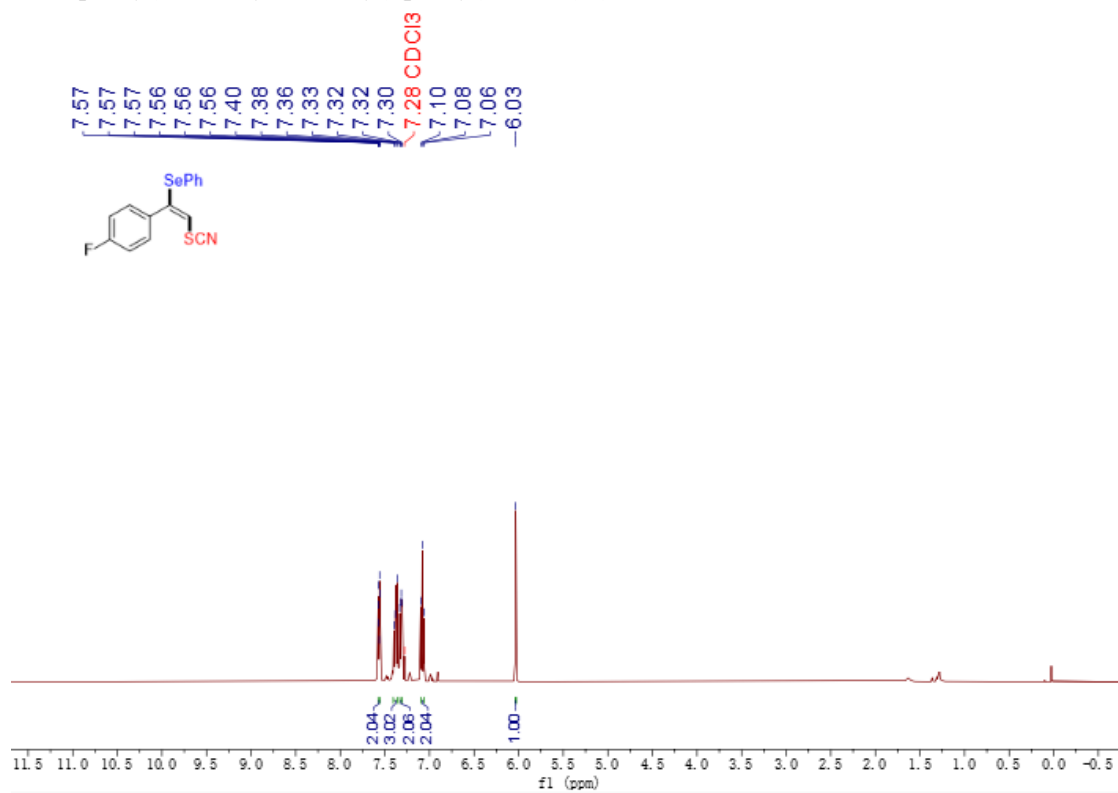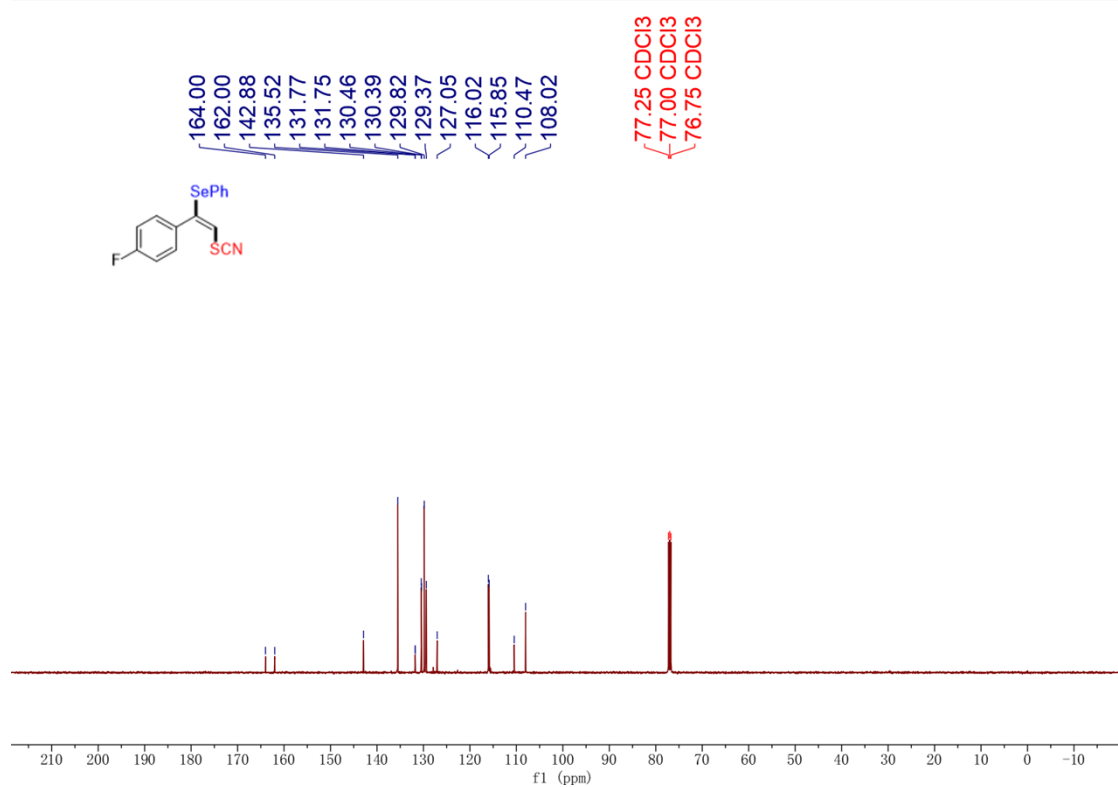

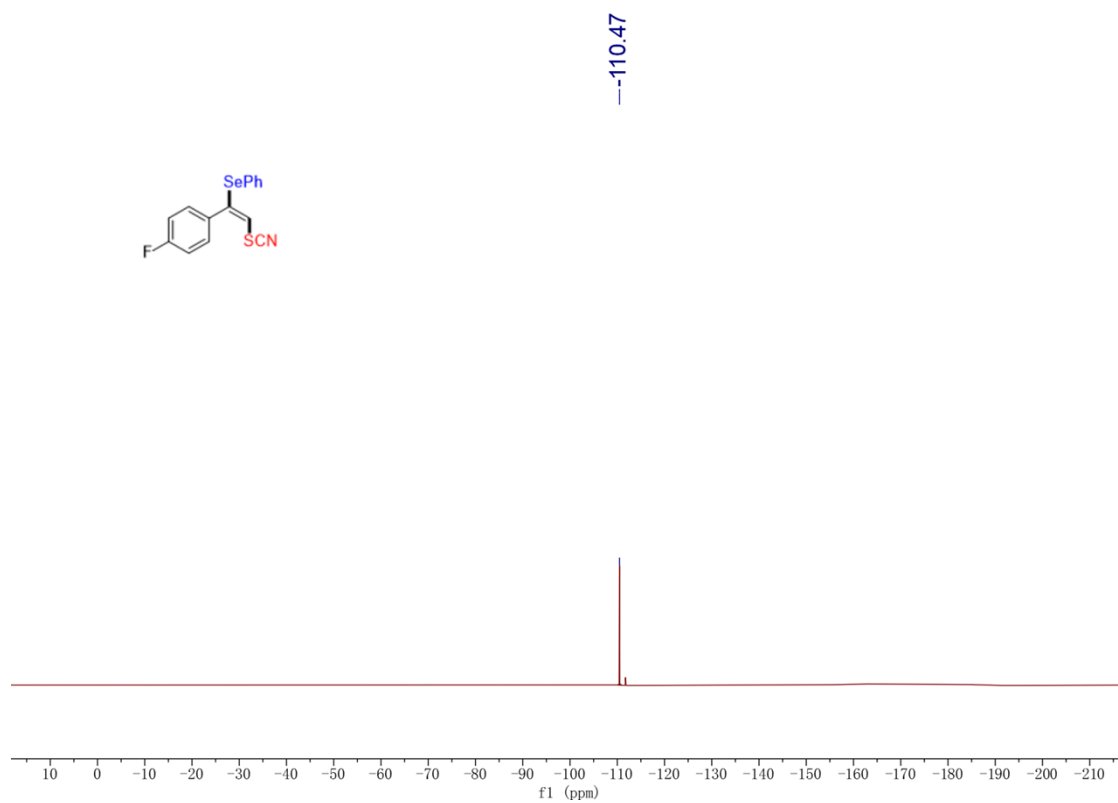

**Figure S4.** The  $^1\text{H}$  (500 MHz),  $^{13}\text{C}$  (125 MHz) NMR spectrum for (*E*)-4-(1-(phenylselanyl)-2-thiocyanatovinyl)benzotrile (**4d**) in  $\text{CDCl}_3$ .

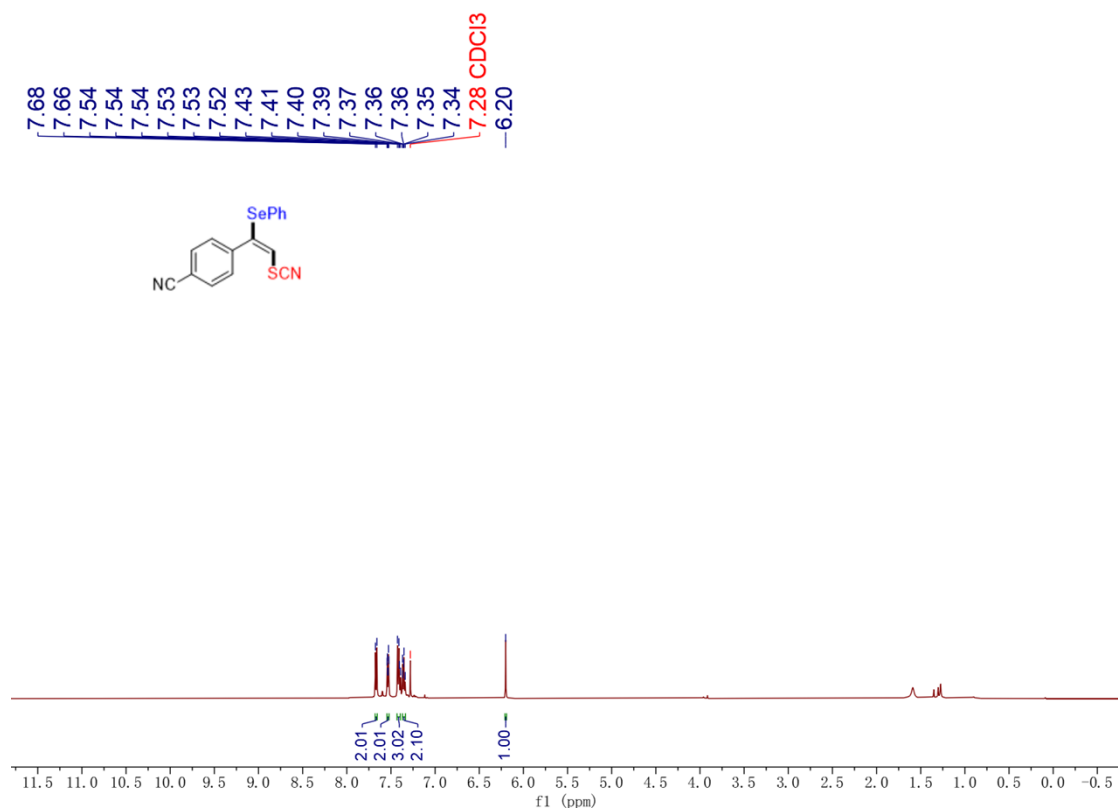

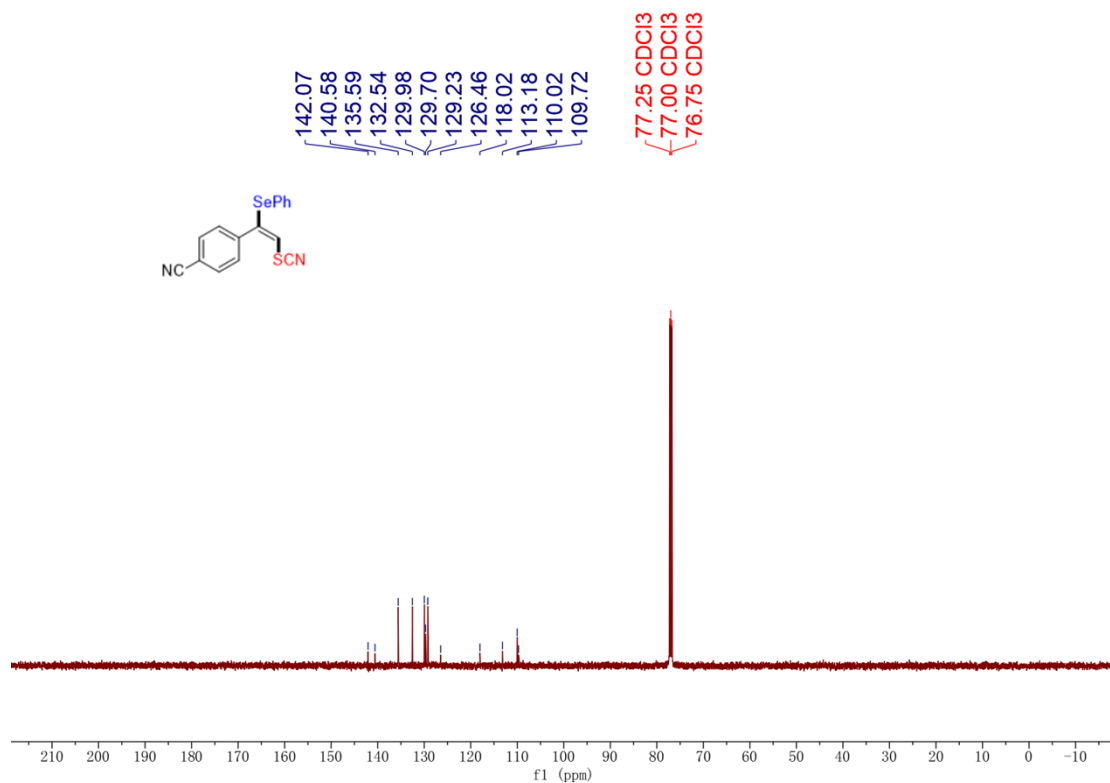

**Figure S5.** The <sup>1</sup>H (500 MHz), <sup>13</sup>C (125 MHz) NMR spectrum for (*E*)-(1-(4-methoxyphenyl)-2-thiocyanatovinyl)(phenyl)selane (**4e**) in CDCl<sub>3</sub>.

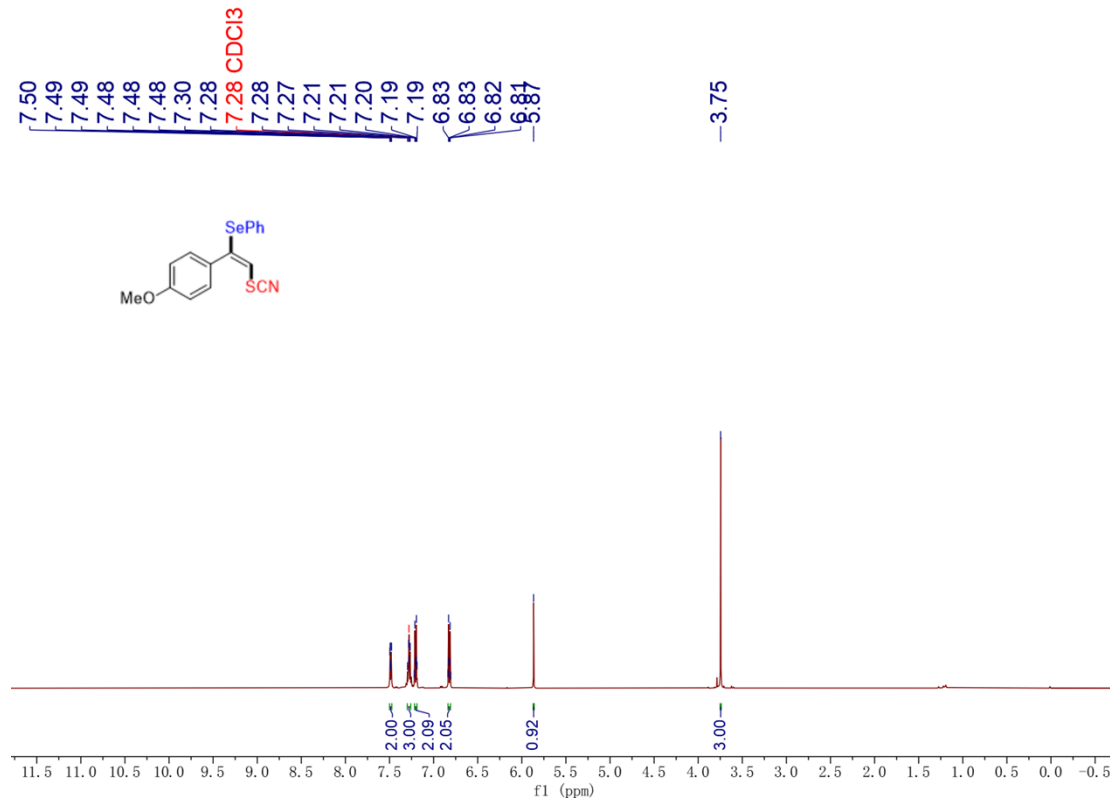

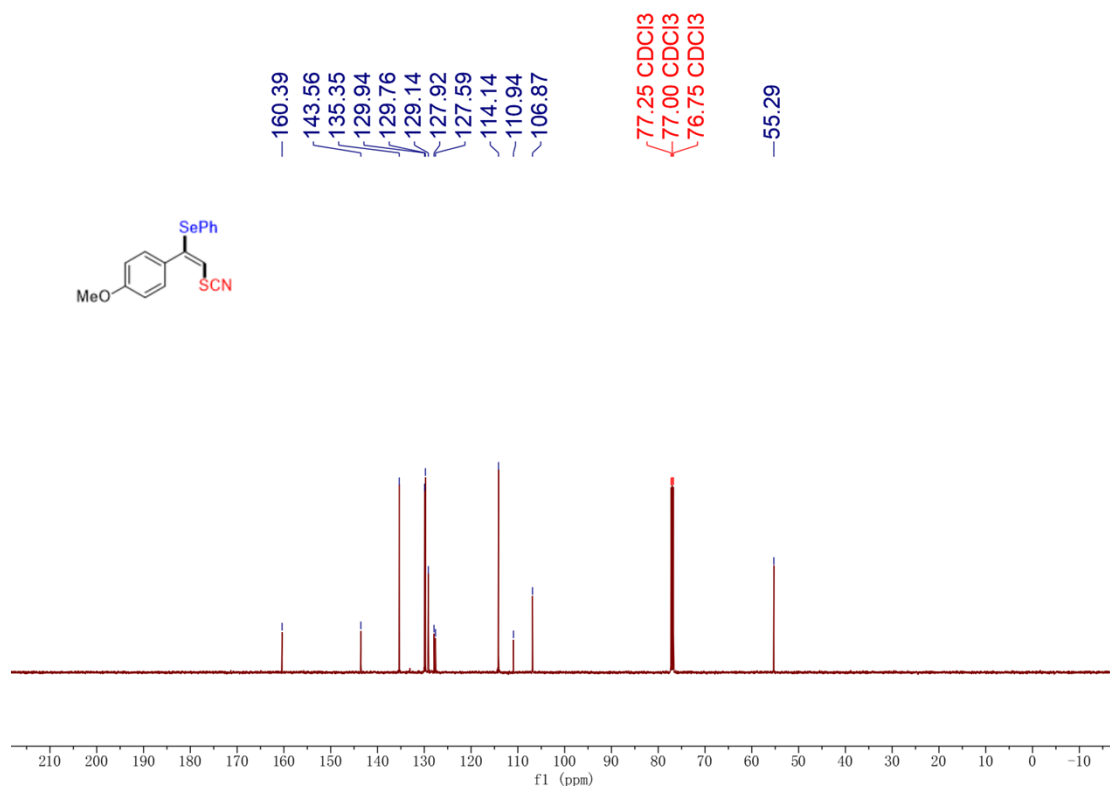

**Figure S6.** The <sup>1</sup>H (500 MHz), <sup>13</sup>C (125 MHz) NMR spectrum for methyl (*E*)-4-(1-(phenylselanyl)-2-thiocyanatovinyl)benzoate (**4f**) in CDCl<sub>3</sub>.

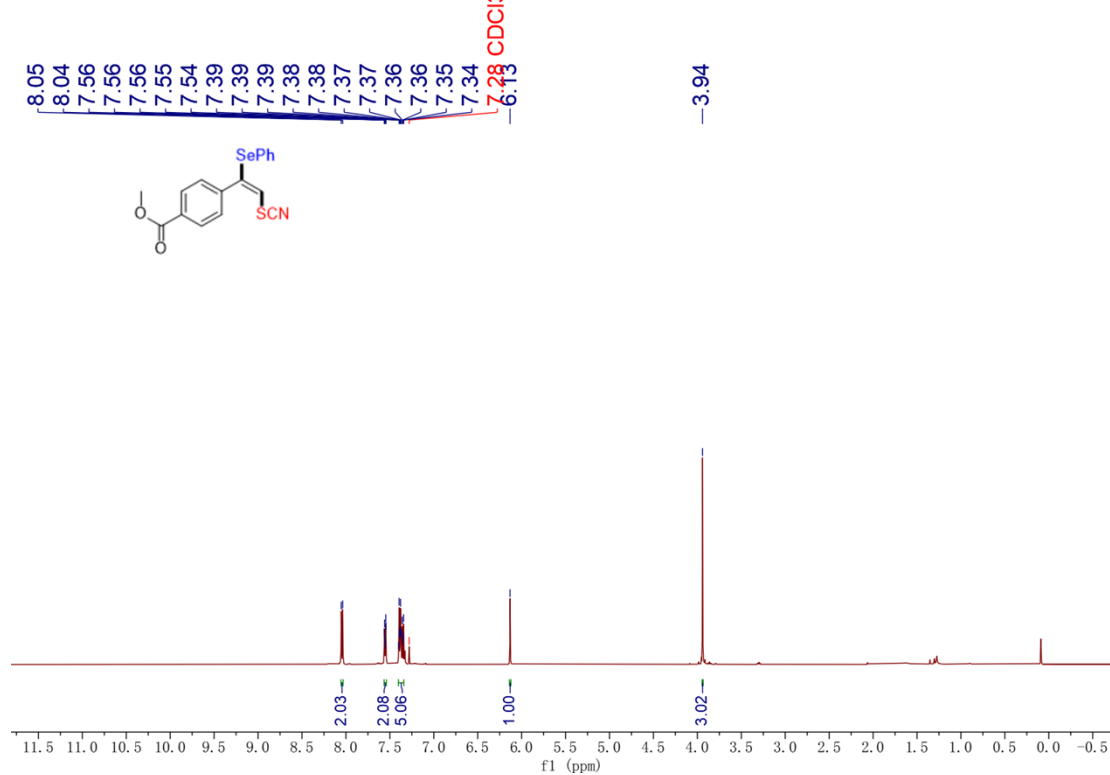

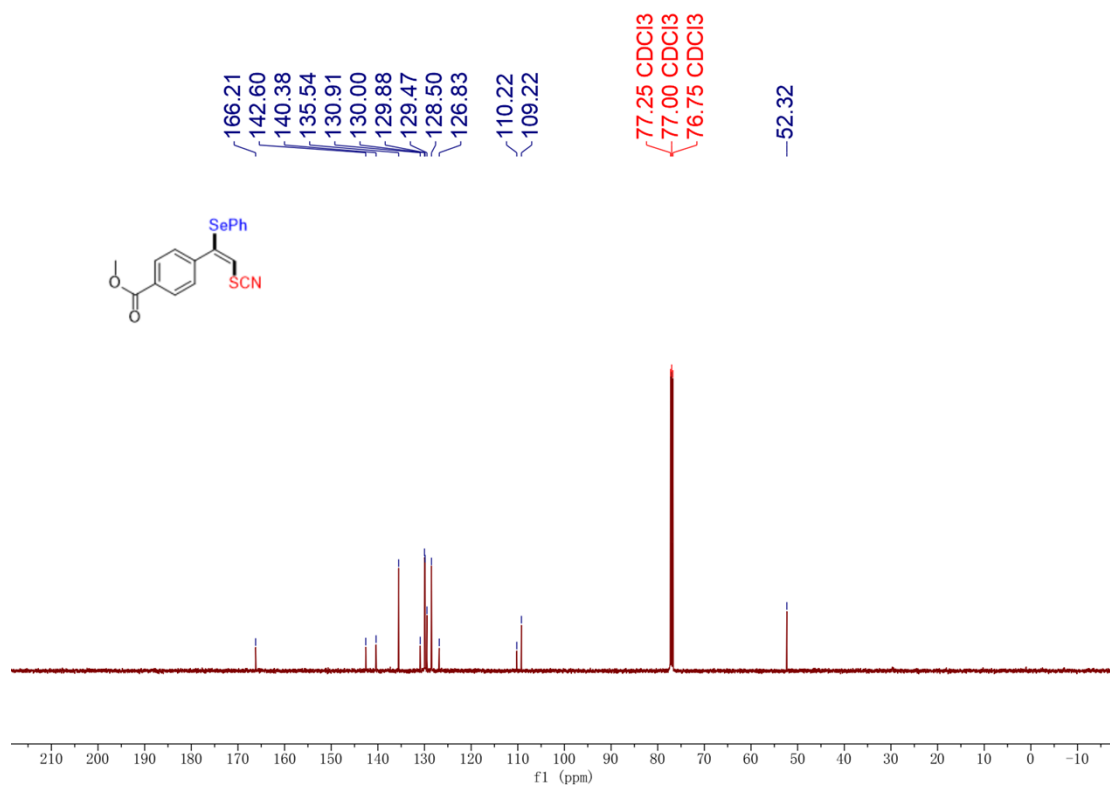

**Figure S7.** The <sup>1</sup>H (500 MHz), <sup>13</sup>C (125 MHz) NMR spectrum for (*E*)-2-bromo-1-(4-(trifluoromethyl)phenyl)vinyl trifluoromethanesulfonate (**4g**) in CDCl<sub>3</sub>.

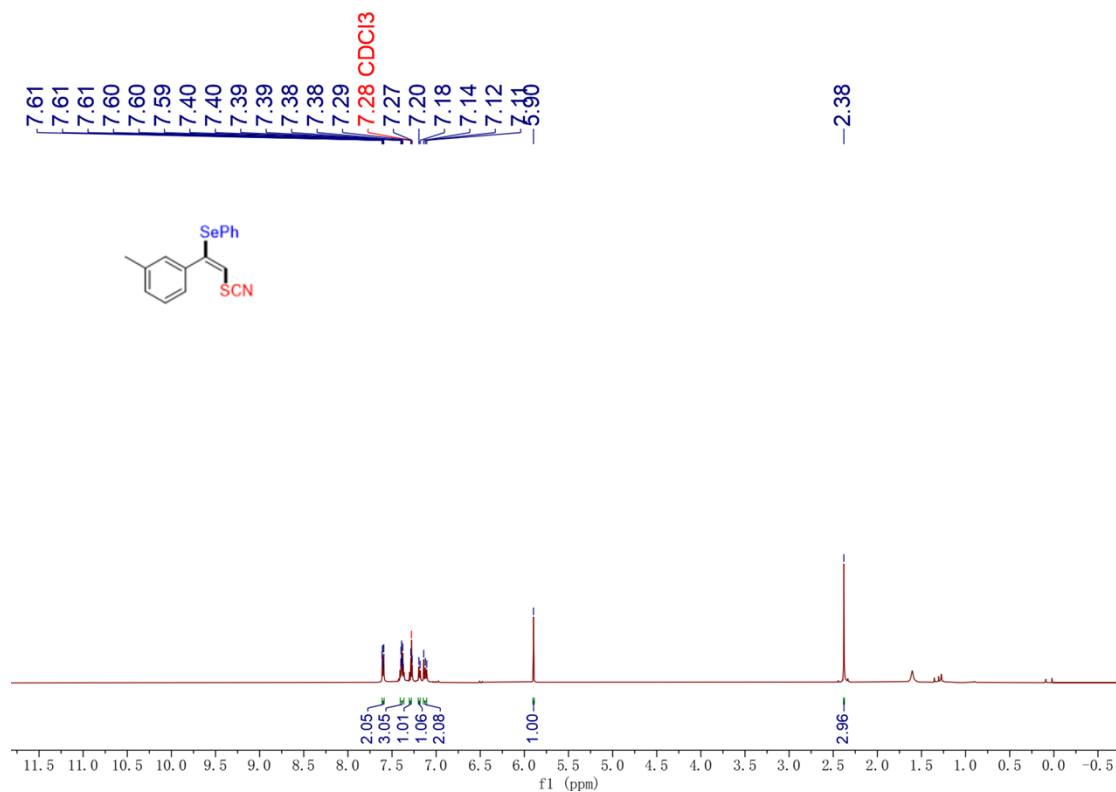

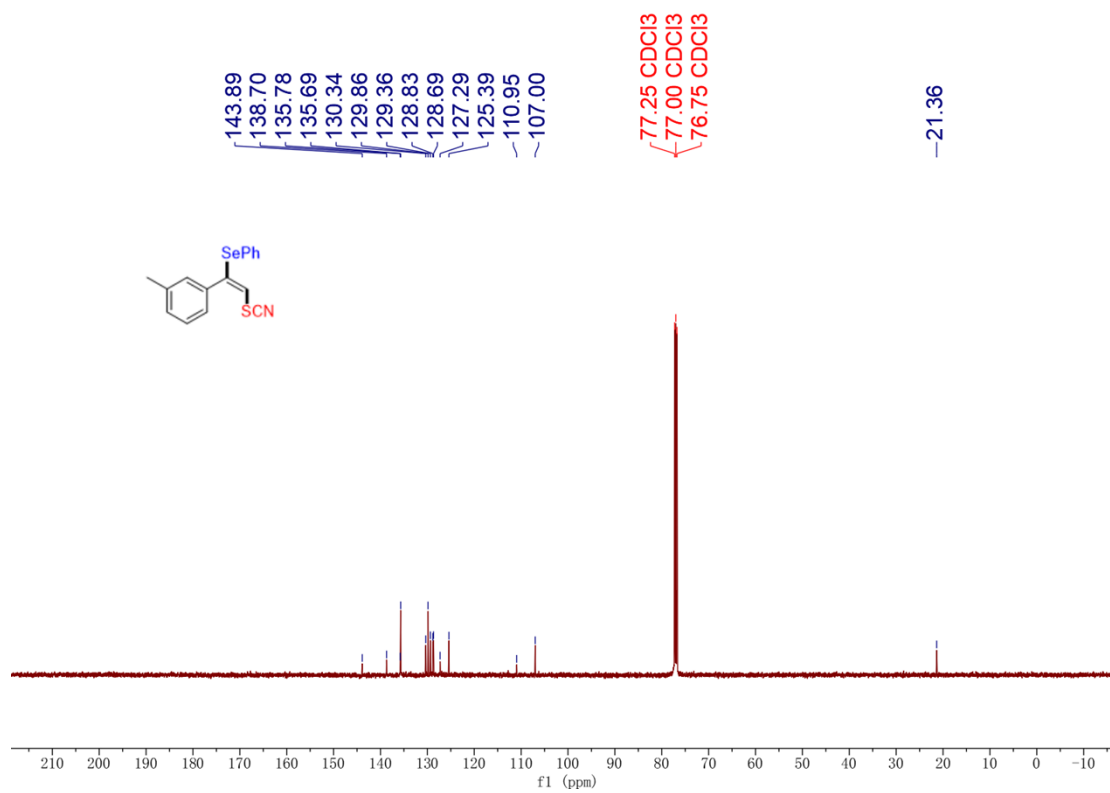

**Figure S8.** The  $^1\text{H}$  (500 MHz),  $^{13}\text{C}$  (125 MHz) NMR spectrum for (*E*)-1-(3-chlorophenyl)-2-thiocyanatovinyl(phenyl)selane (**4h**) in  $\text{CDCl}_3$ .

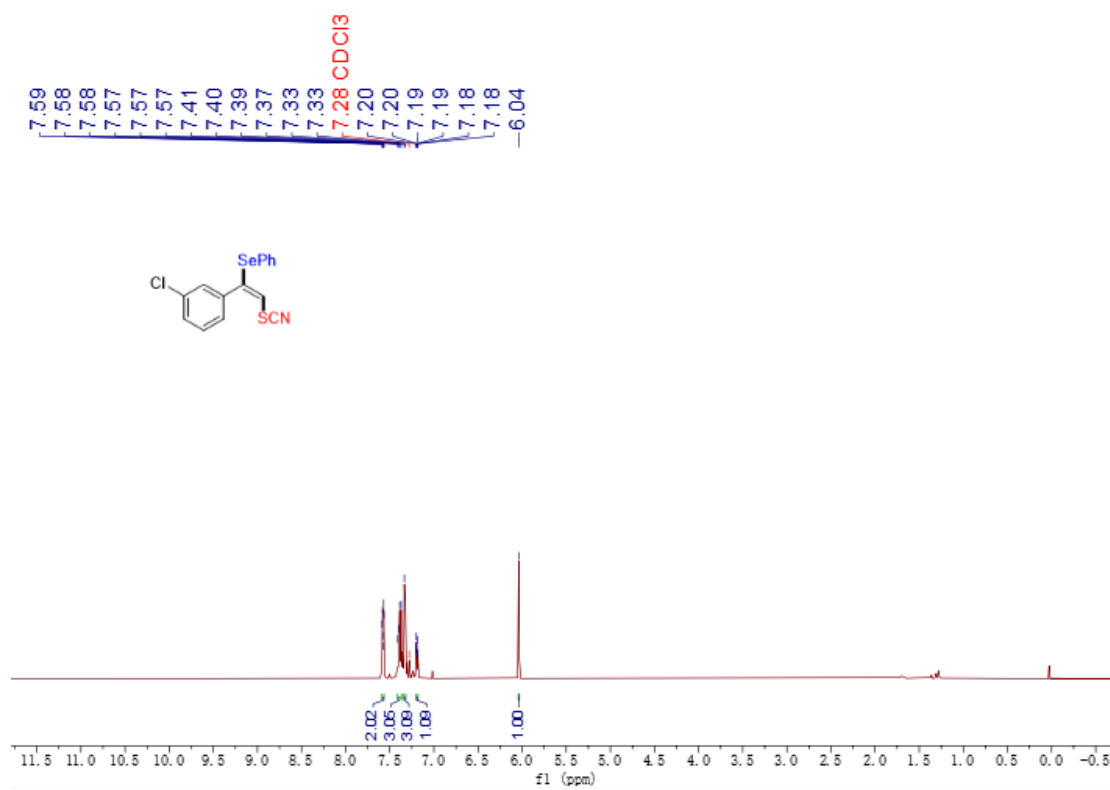

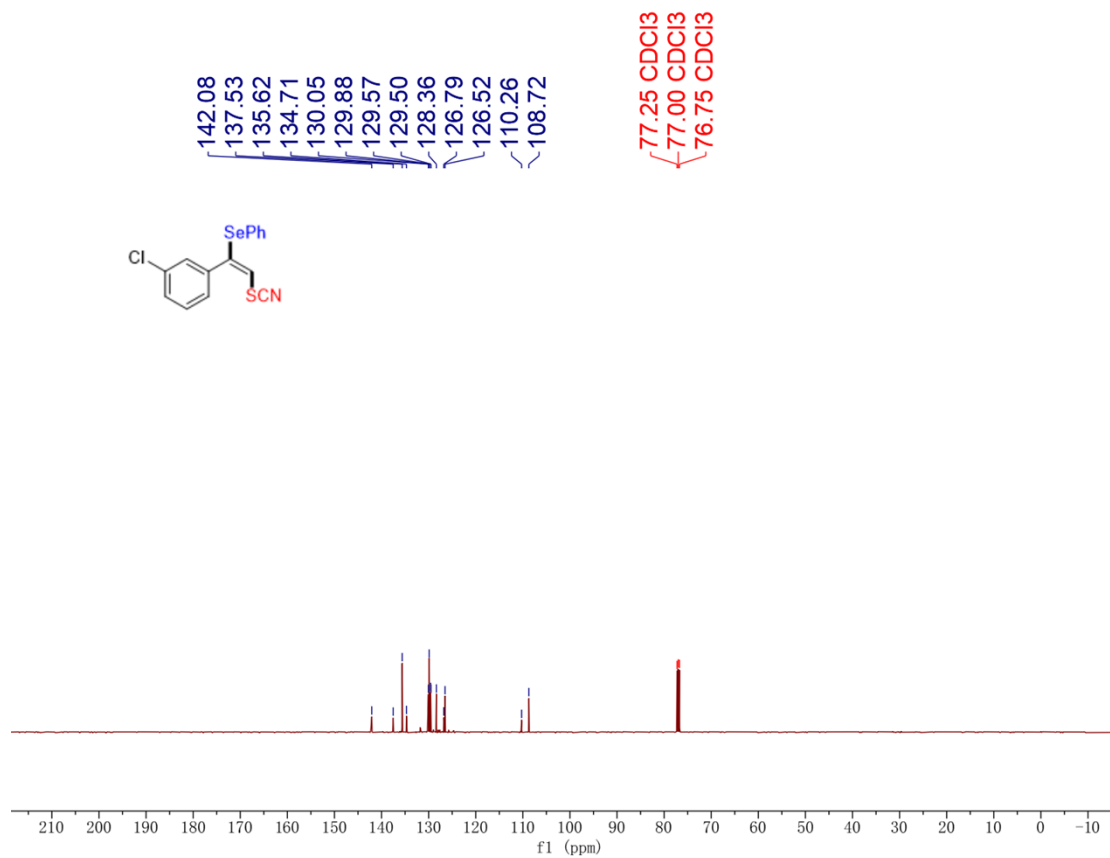

**Figure S9.** The <sup>1</sup>H (500 MHz), <sup>13</sup>C (125 MHz) and <sup>19</sup>F (471 MHz) NMR spectrum for methyl (*E*)-(1-(3-fluorophenyl)-2-thiocyanatovinyl)(phenyl)selane (**4i**) in CDCl<sub>3</sub>.

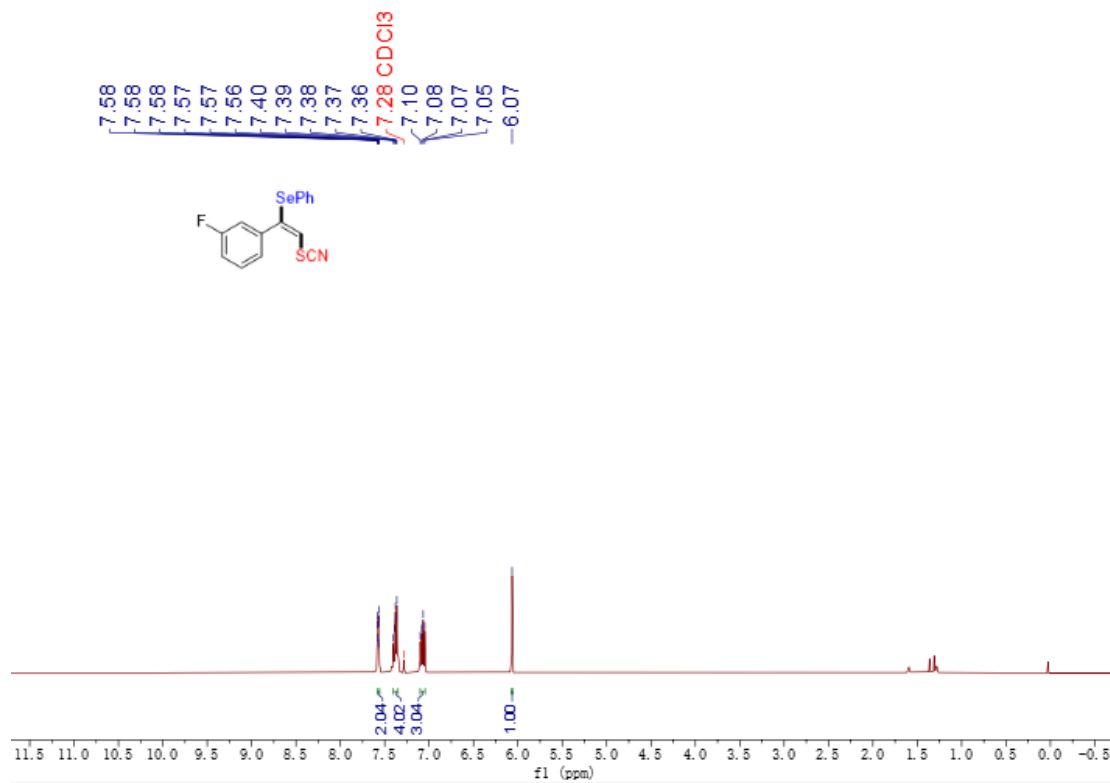

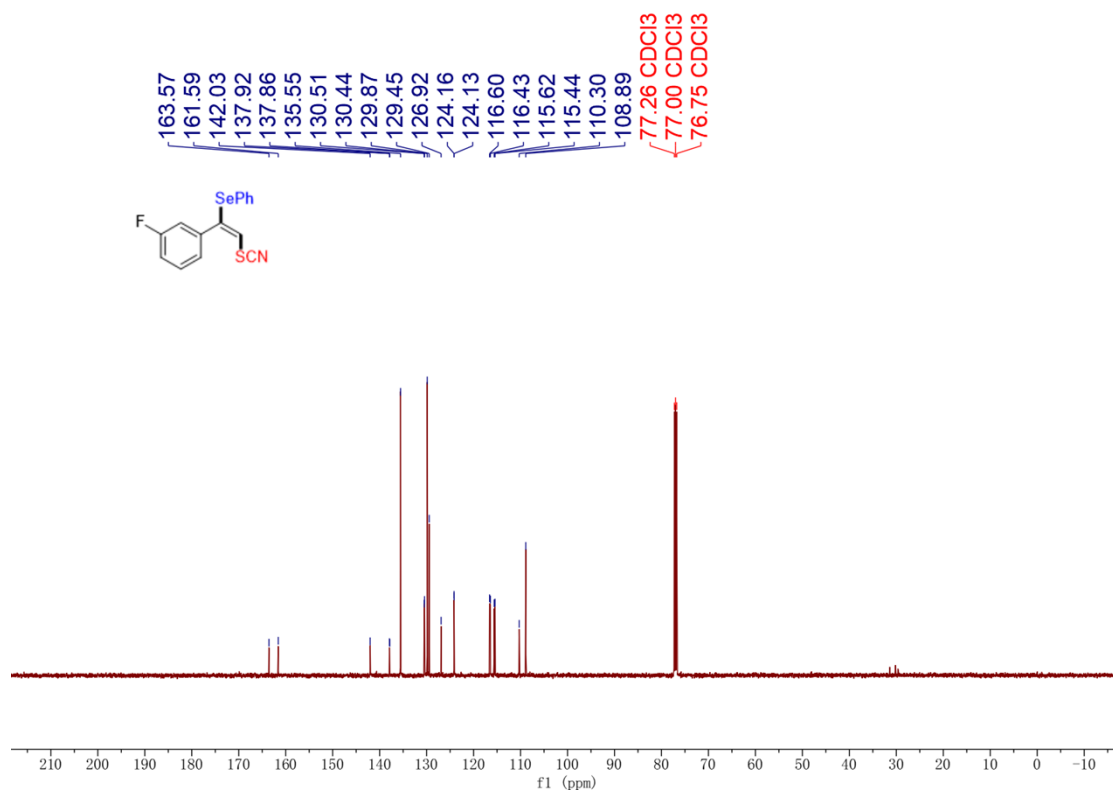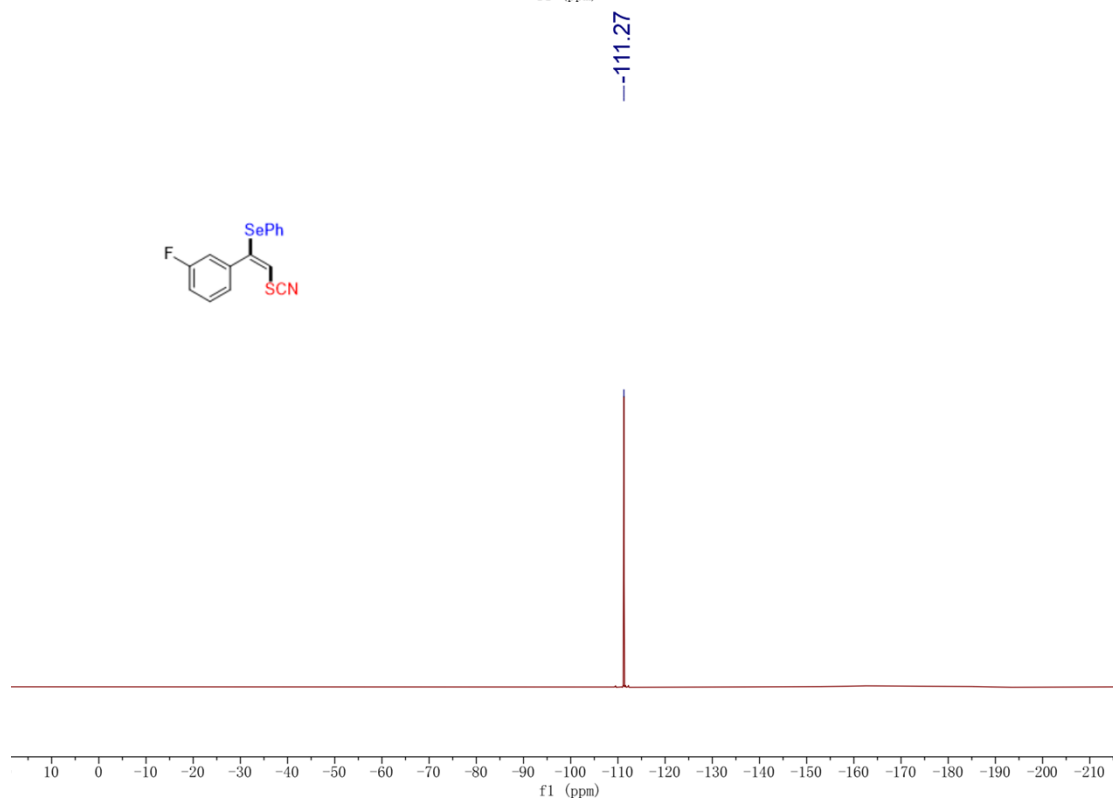

**Figure S10.** The  $^1\text{H}$  (500 MHz),  $^{13}\text{C}$  (125 MHz) NMR spectrum for (*E*)-(1-(2-bromophenyl)-2-thiocyanatovinyl)(phenyl)selane (**4j**) in  $\text{CDCl}_3$ .



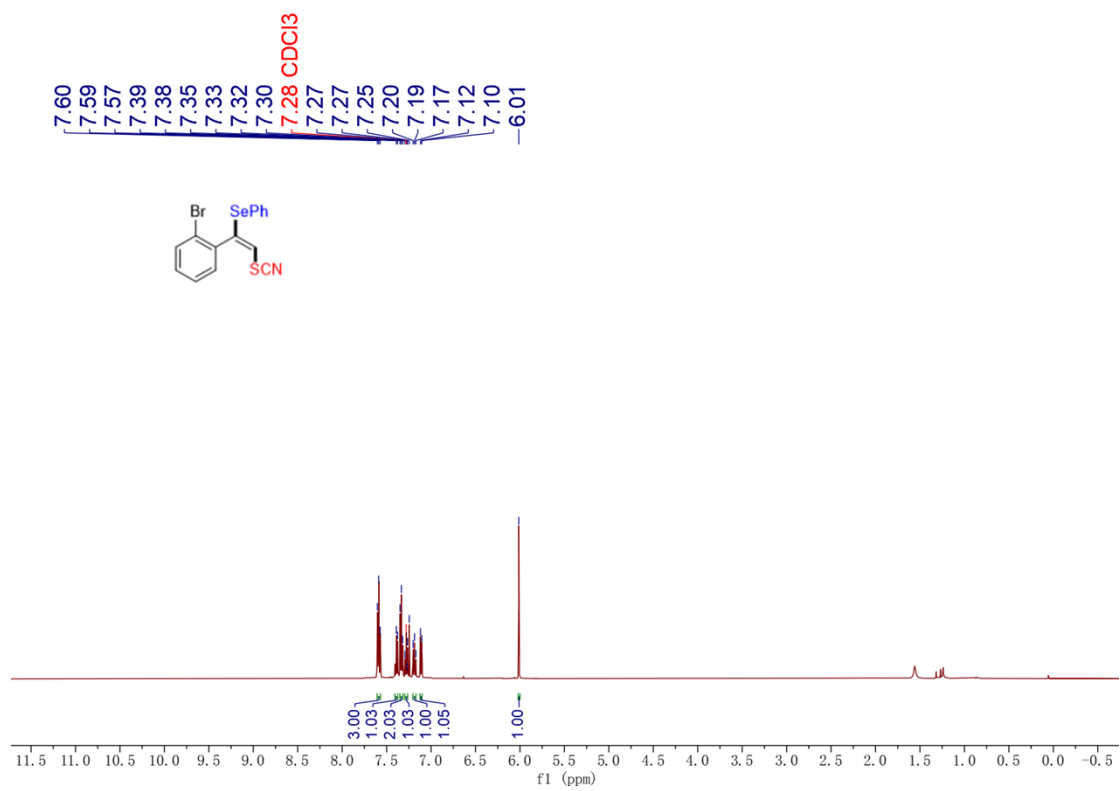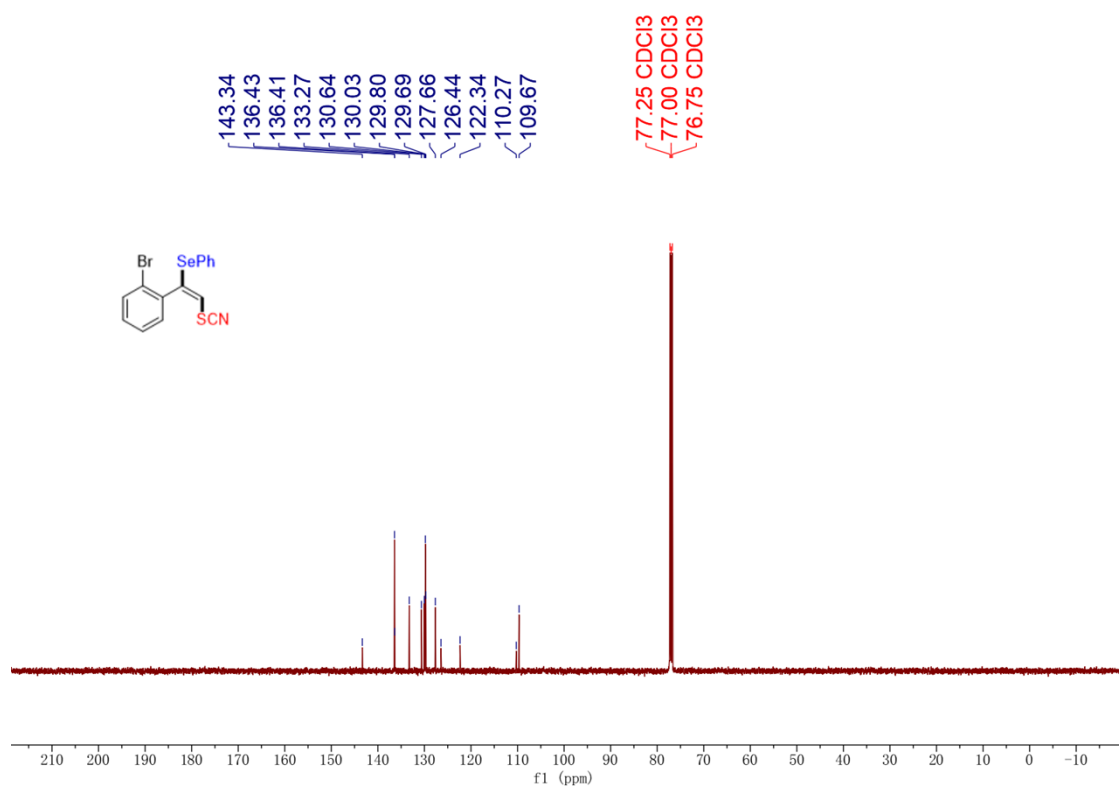

**Figure S11.** The <sup>1</sup>H (500 MHz), <sup>13</sup>C (125 MHz) NMR spectrum for (*E*)-(1-(2-methoxyphenyl)-2-thiocyanatovinyl)(phenyl)selane (**4k**) in CDCl<sub>3</sub>.

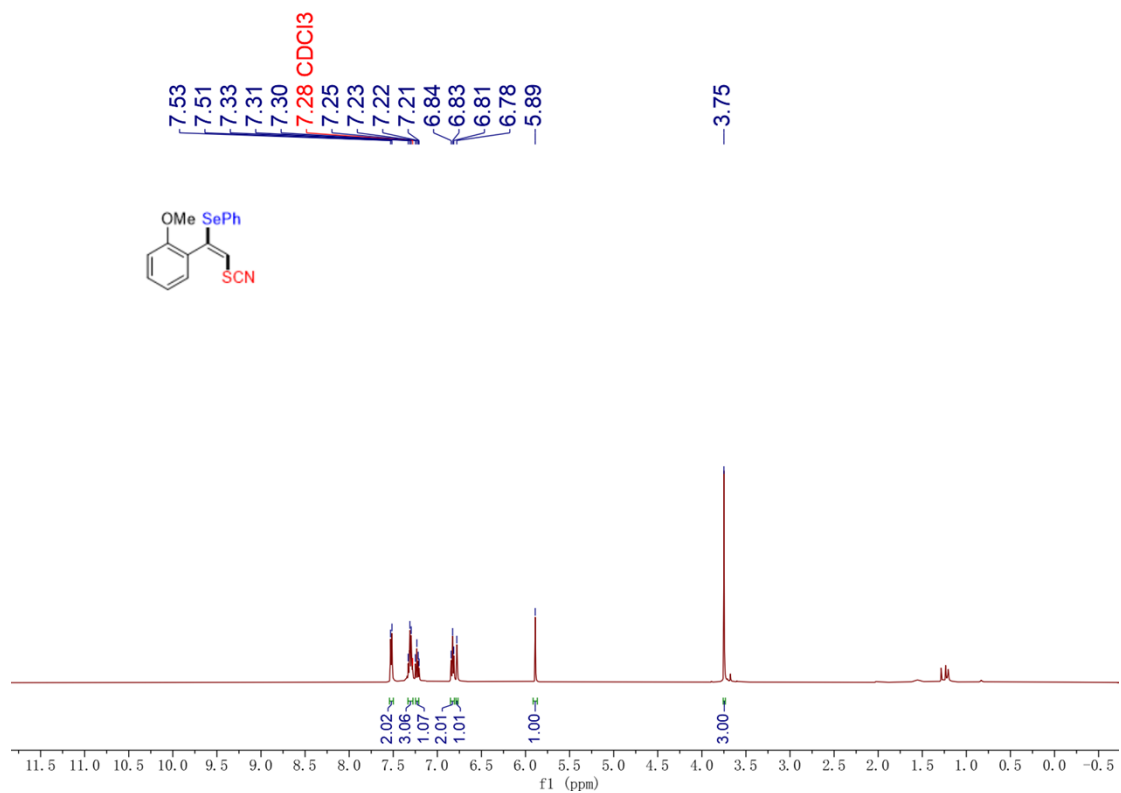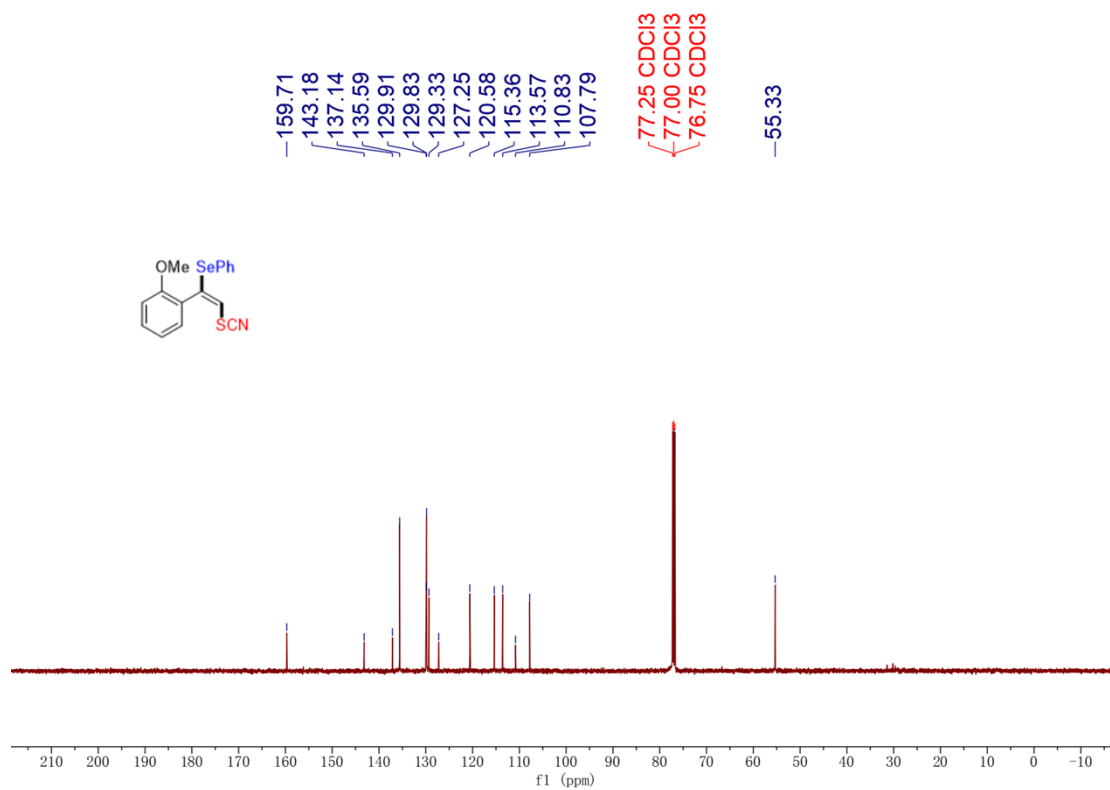

**Figure S12.** The <sup>1</sup>H (500 MHz), <sup>13</sup>C (125 MHz) NMR spectrum for (*E*)-2-(4-(1-(phenylselanyl)-2-thiocyanatovinyl)phenyl)acetonitrile (**41**) in CDCl<sub>3</sub>.

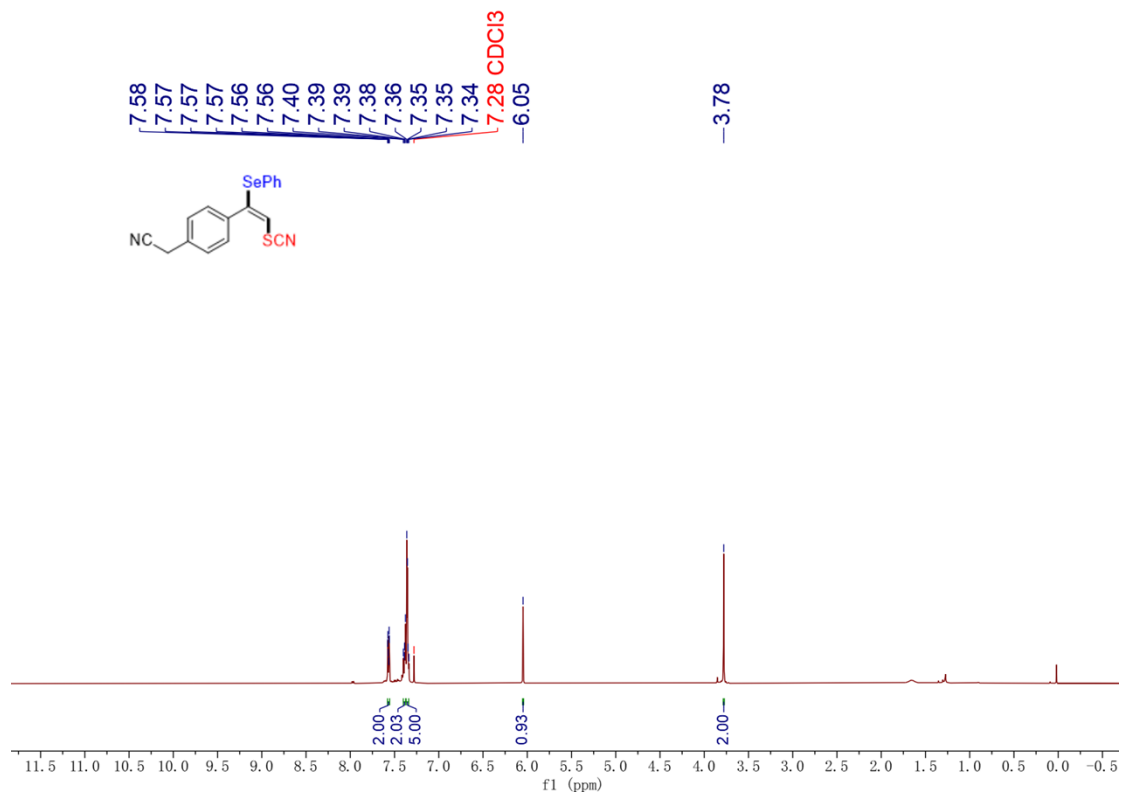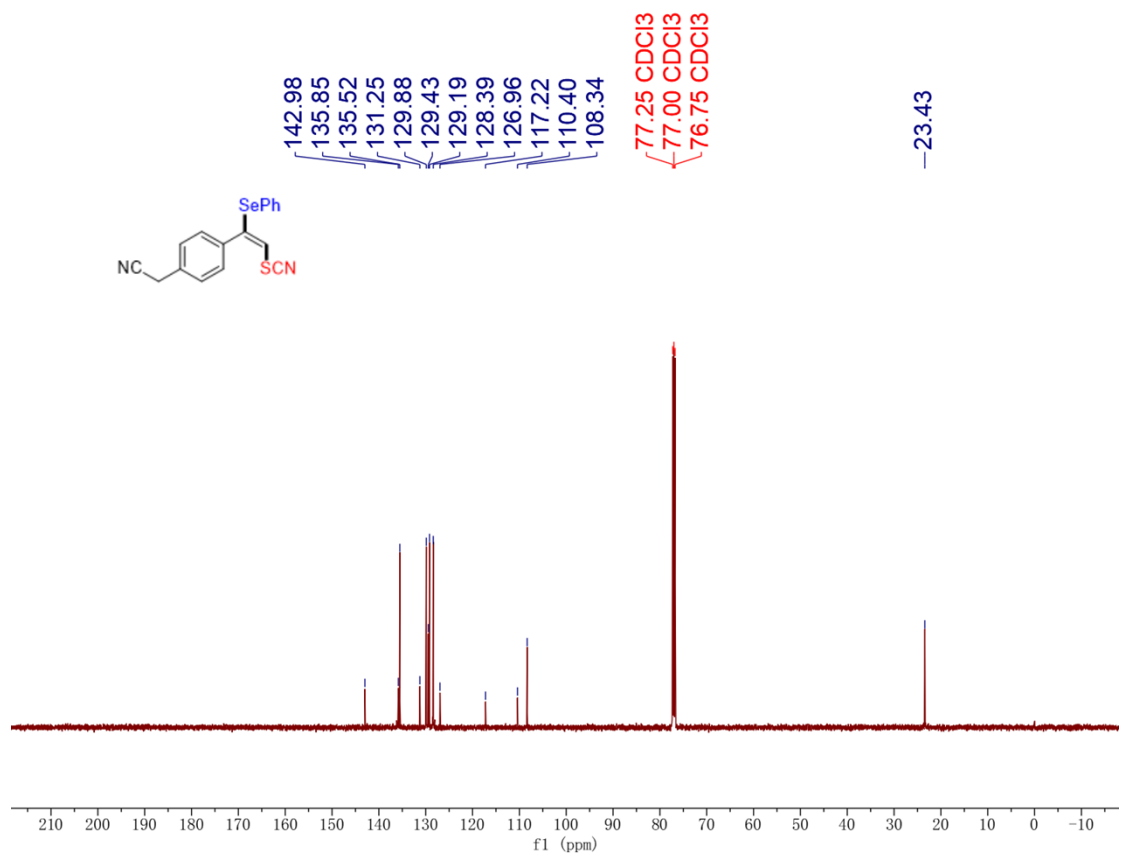

**Figure S13.** The  $^1\text{H}$  (500 MHz),  $^{13}\text{C}$  (125 MHz) and  $^{19}\text{F}$  (471 MHz) NMR spectrum for (*E*)-(1-(3,5-difluorophenyl)-2-thiocyanatovinyl)(phenyl)selane (**4m**) in  $\text{CDCl}_3$ .

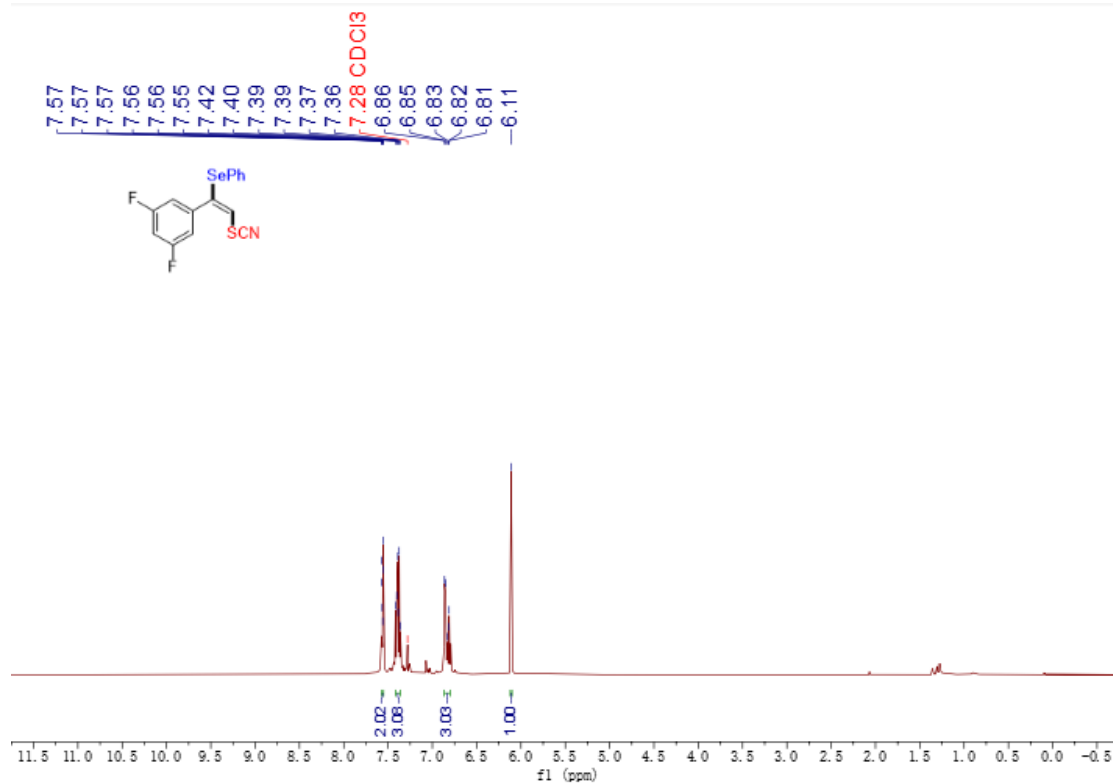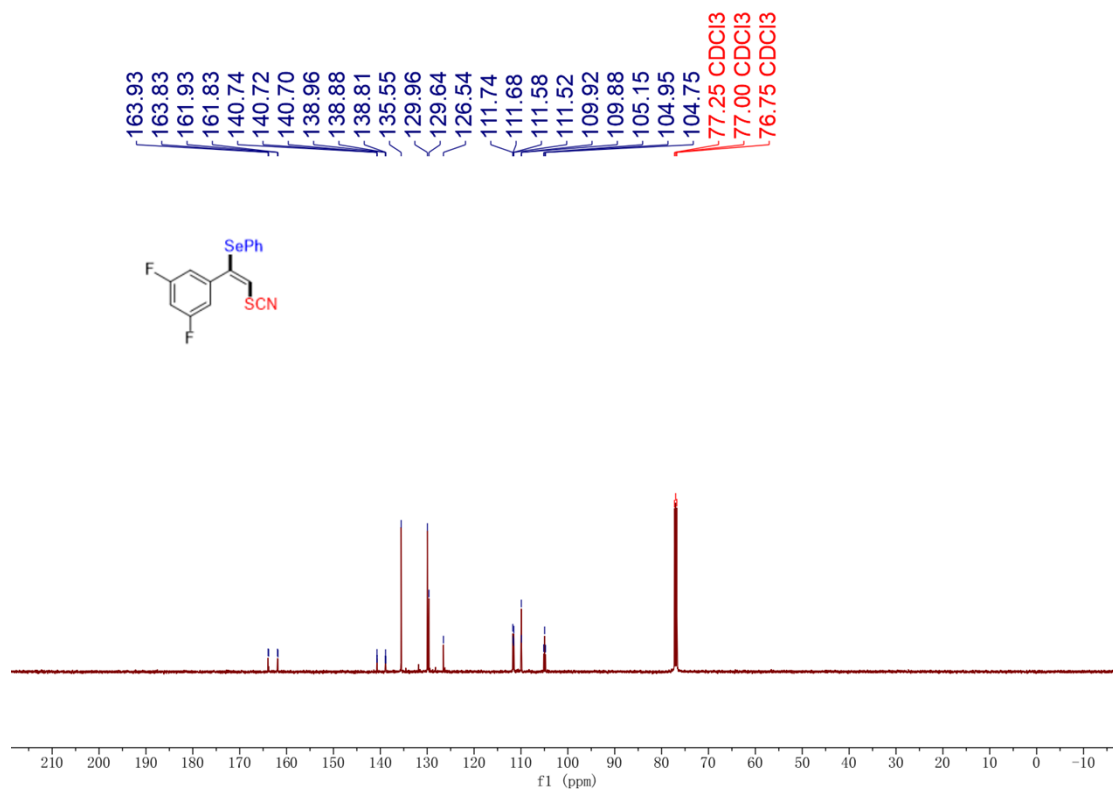

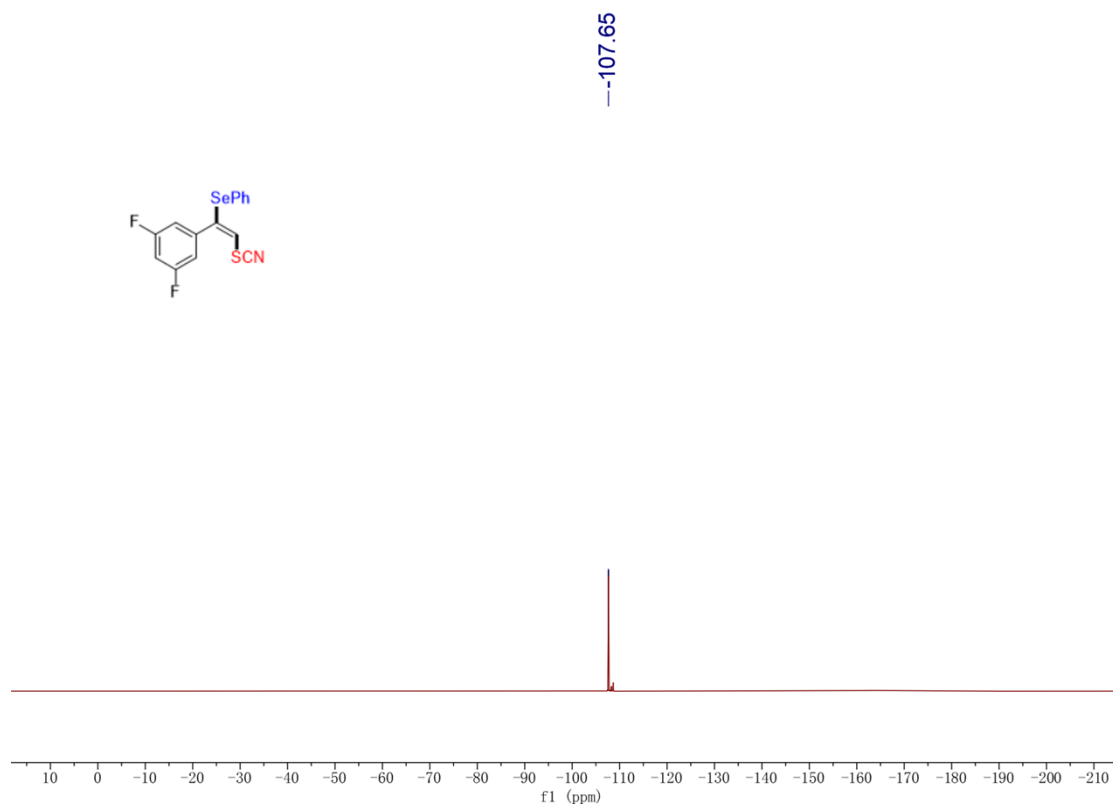

**Figure S14.** The  $^1\text{H}$  (500 MHz),  $^{13}\text{C}$  (125 MHz) NMR spectrum for (*E*)-(1-(4-ethynylphenyl)-2-thiocyanatovinyl)(phenyl)selane (**4n**) in  $\text{CDCl}_3$ .

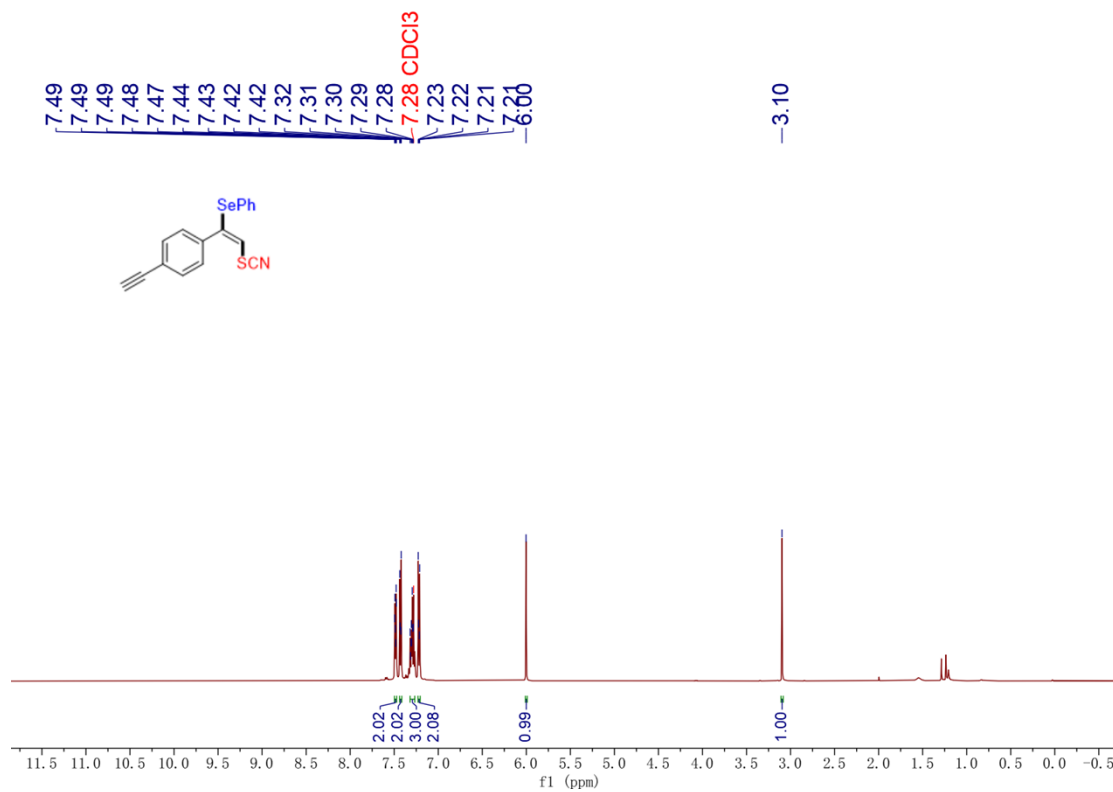

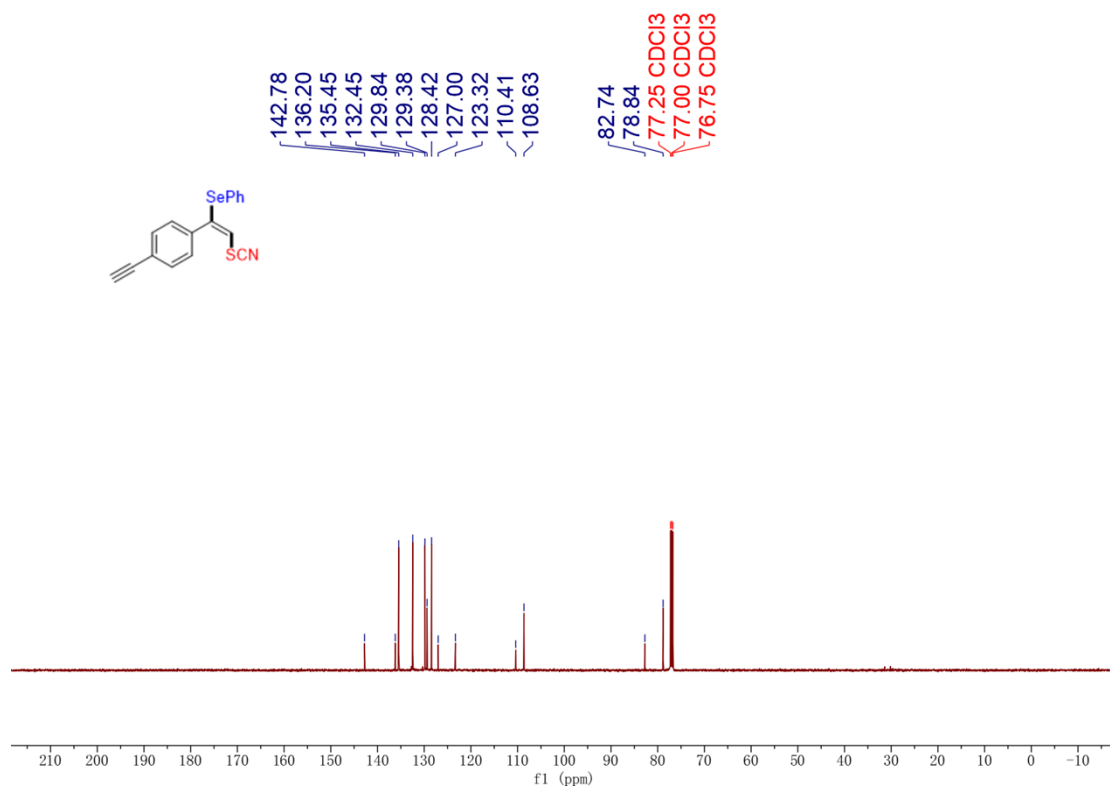

**Figure S15.** The <sup>1</sup>H (500 MHz), <sup>13</sup>C (125 MHz) NMR spectrum for methyl (*E*)-3-(1-(phenylselanyl)-2-thiocyanatovinyl)pyridine (**4o**) in CDCl<sub>3</sub>.

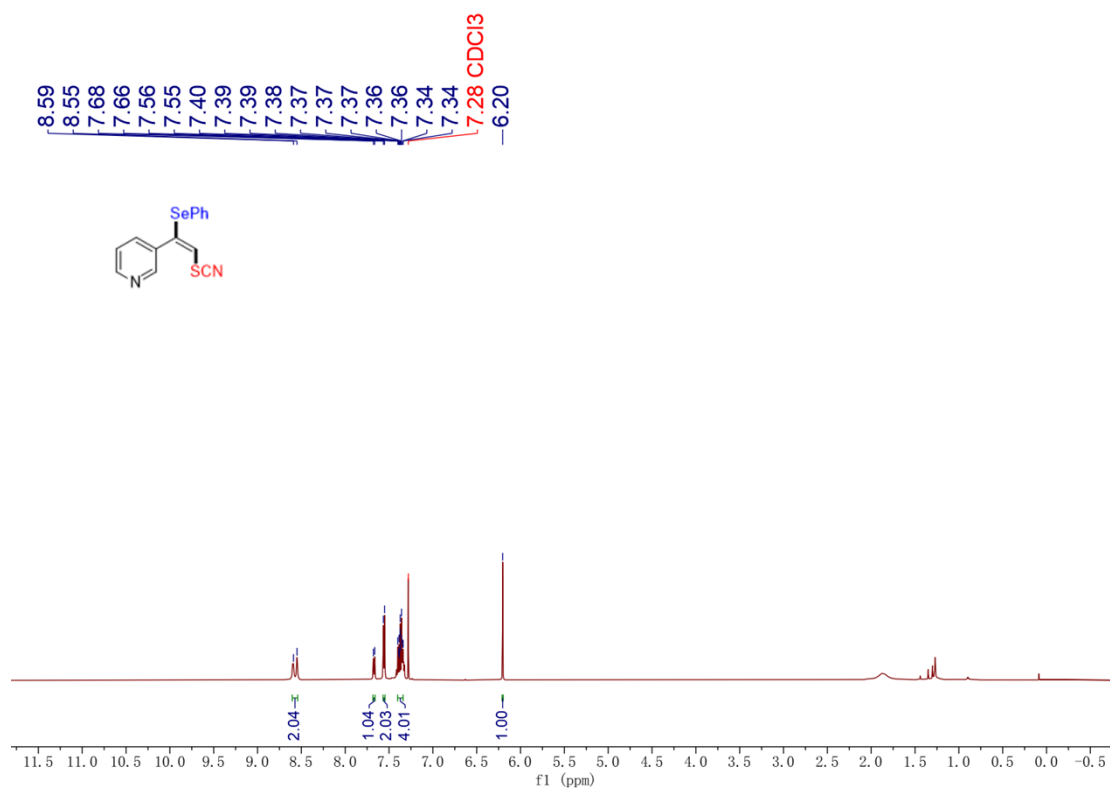

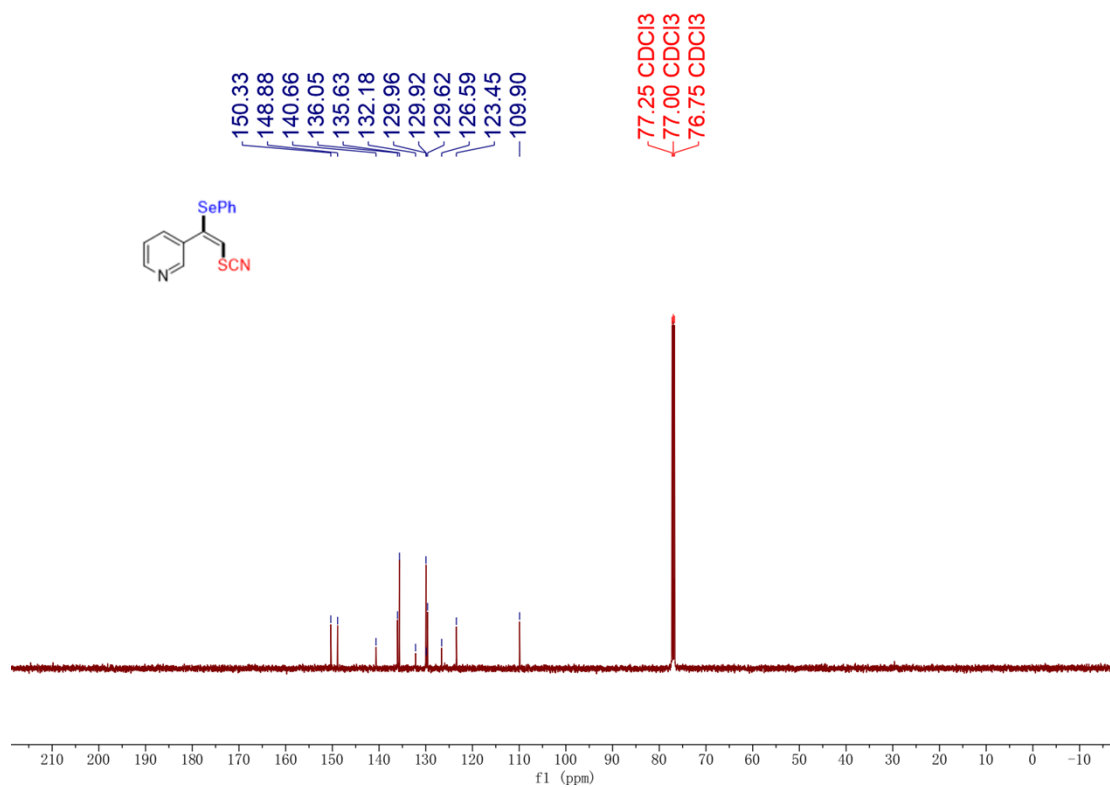

**Figure S16.** The  $^1\text{H}$  (500 MHz),  $^{13}\text{C}$  (125 MHz) NMR spectrum for (*E*)-2-(1-(phenylselanyl)-2-thiocyanatovinyl)thiophene (**4p**) in  $\text{CDCl}_3$ .

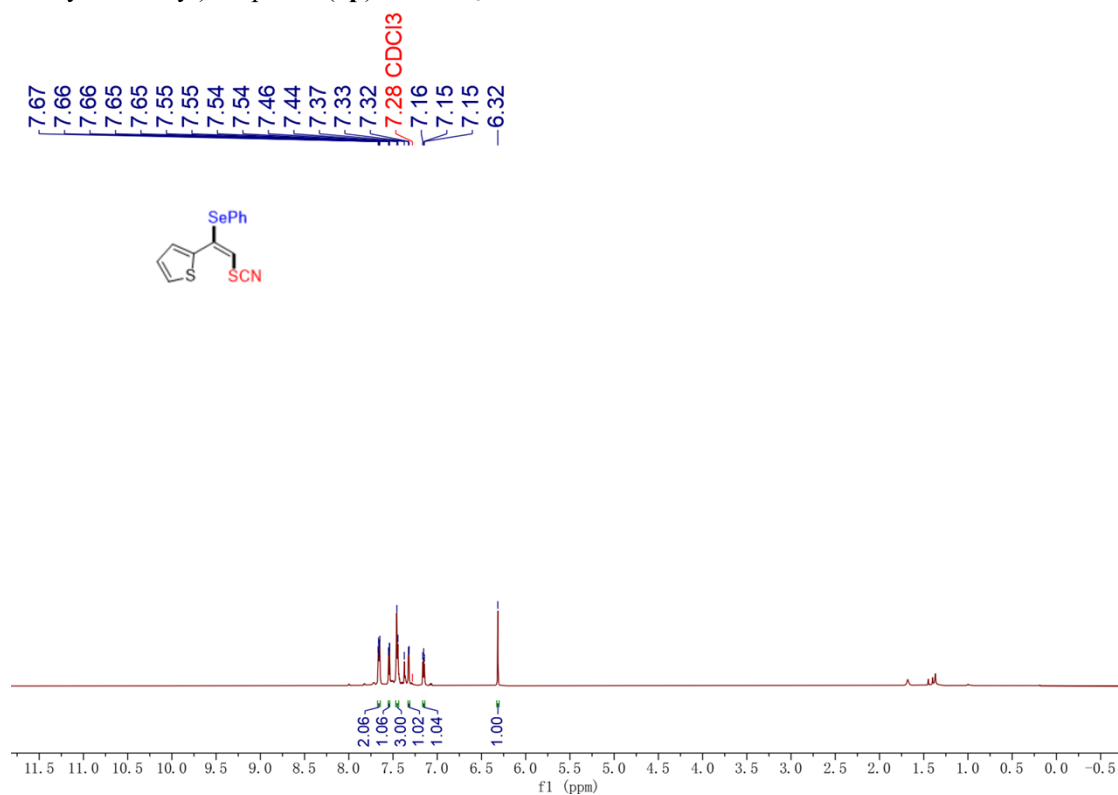

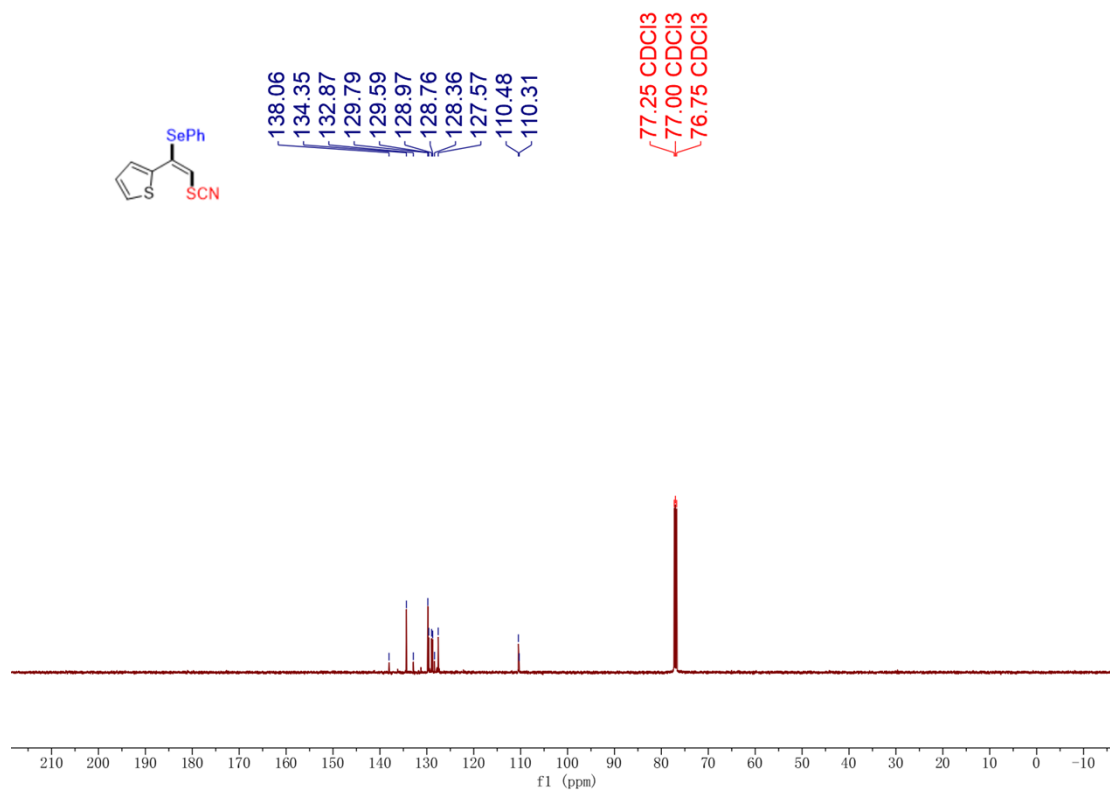

**Figure S17.** The <sup>1</sup>H (500 MHz), <sup>13</sup>C (125 MHz) NMR spectrum for (*E*)-3-(1-(phenylselanyl)-2-thiocyanatovinyl)thiophene (**4q**) in CDCl<sub>3</sub>.

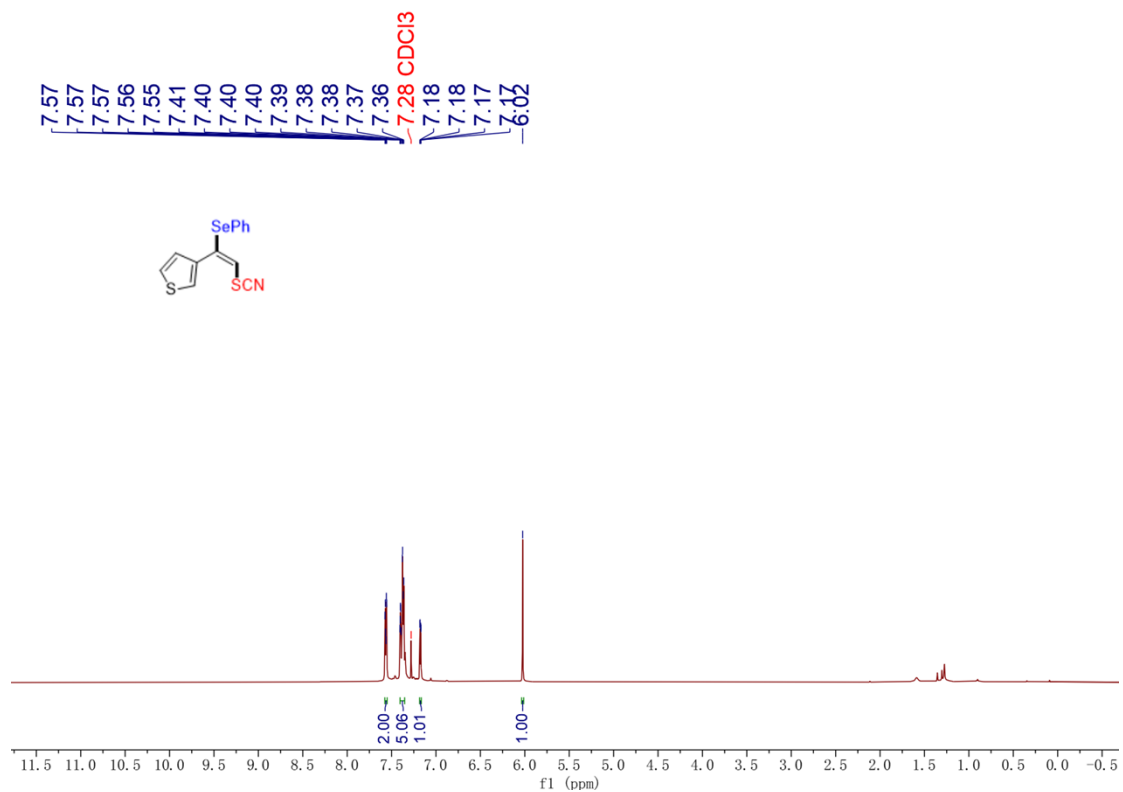



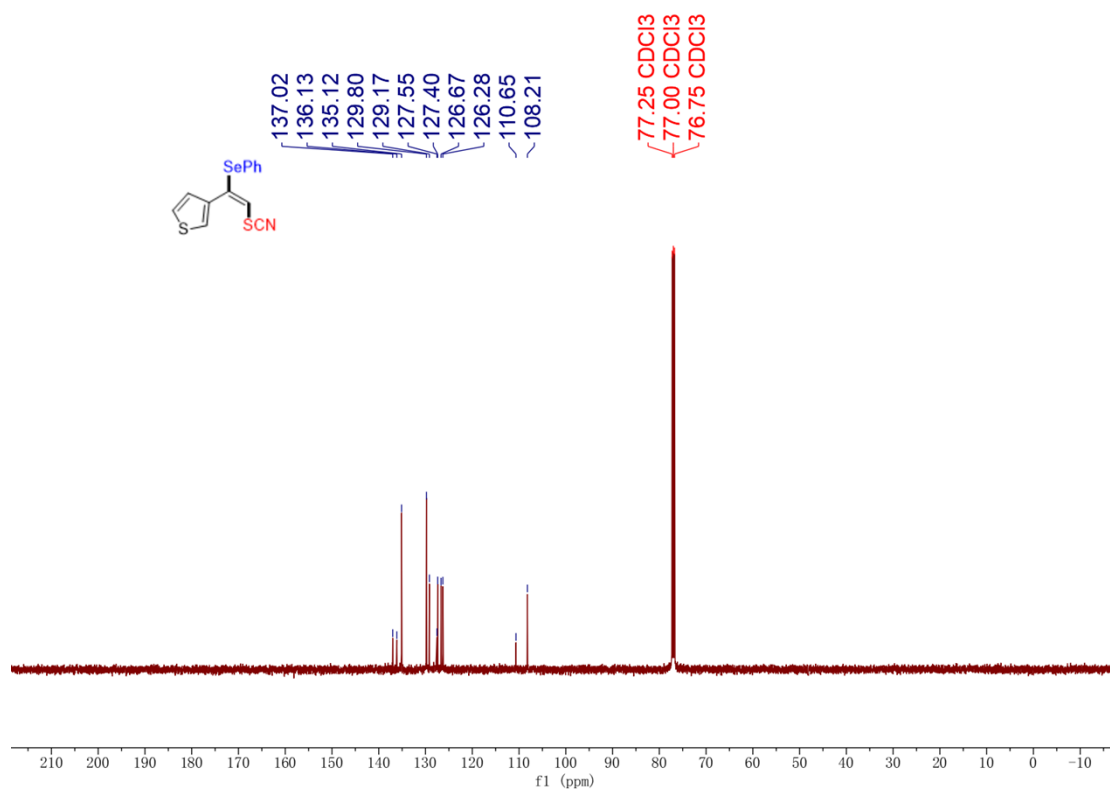

**Figure S18.** The <sup>1</sup>H (500 MHz), <sup>13</sup>C (125 MHz) and <sup>19</sup>F (471 MHz) NMR spectrum for (*E*)-2,2,2-trifluoro-*N*-(2-(phenylselanyl)-3-thiocyanatoallyl)acetamide (**4r**) in CDCl<sub>3</sub>.

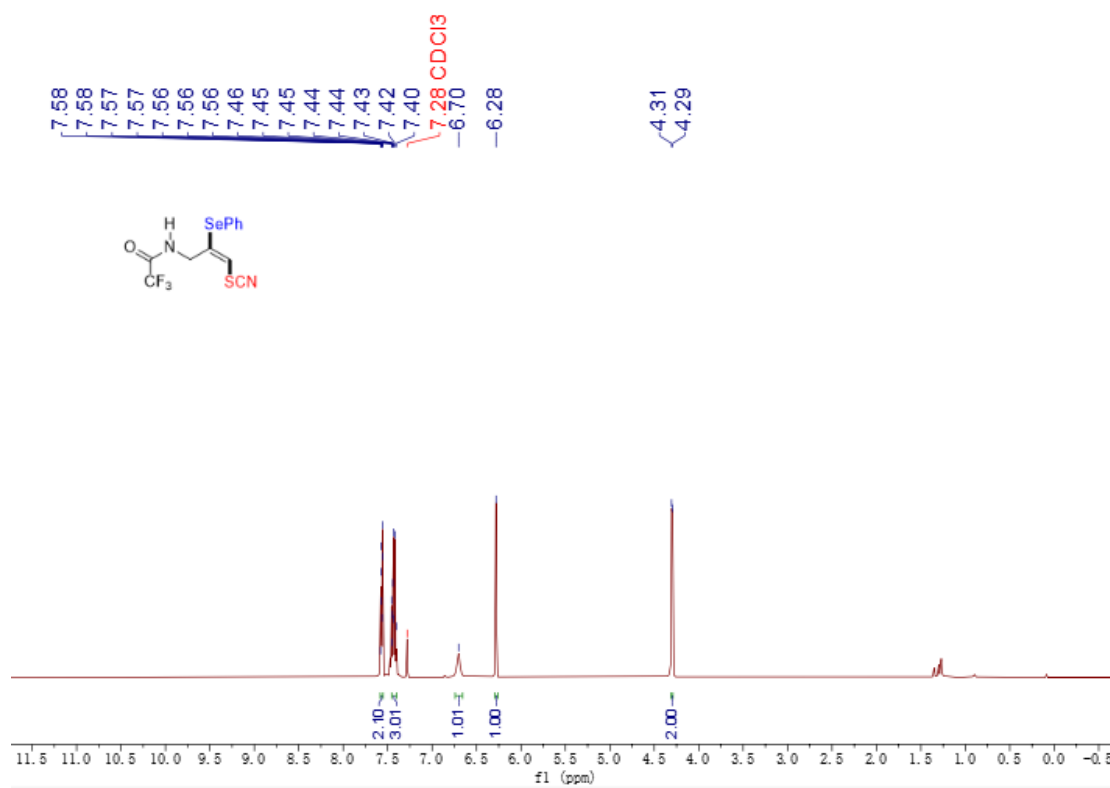

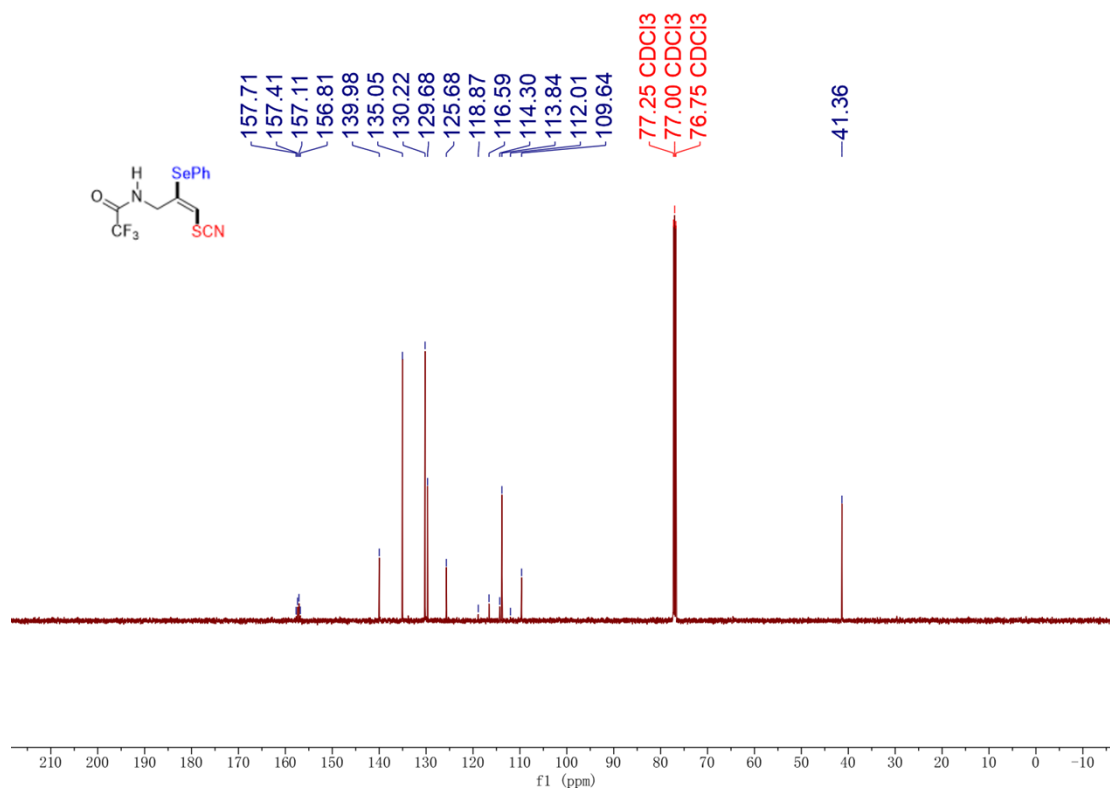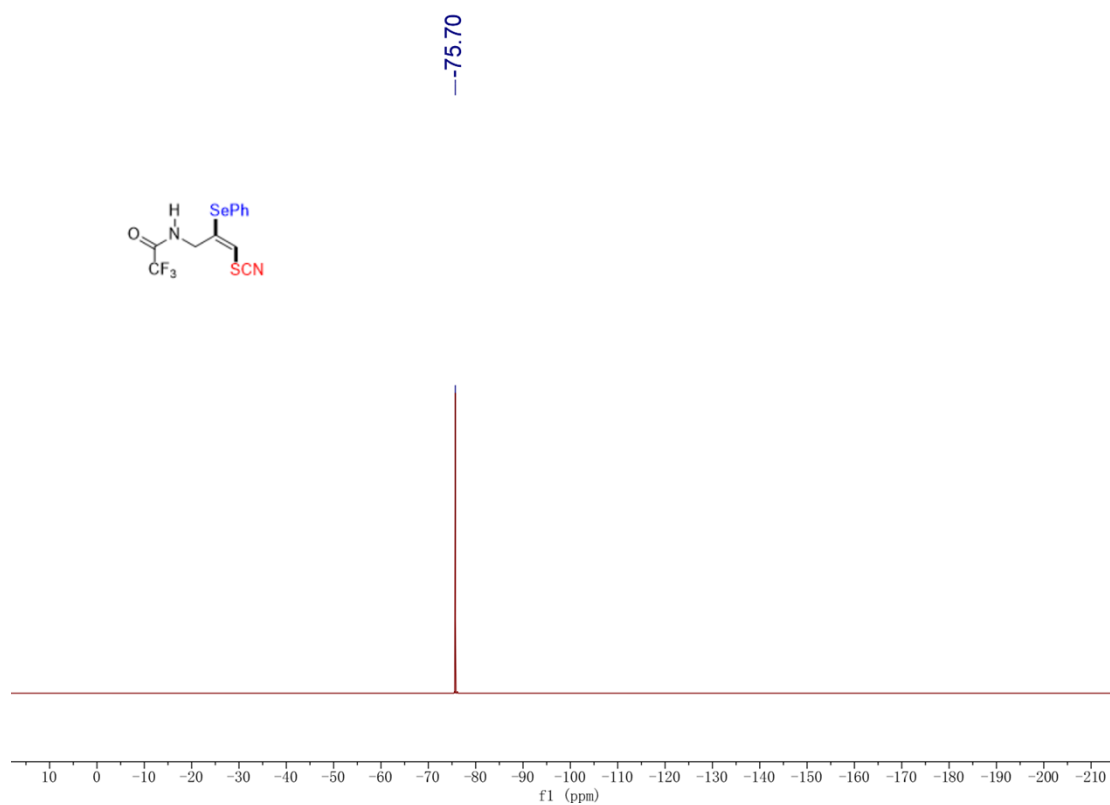

**Figure S19.** The <sup>1</sup>H (500 MHz), <sup>13</sup>C (125 MHz) NMR spectrum for (*E*)-(3,3-diethoxy-1-thiocyanatoprop-1-en-2-yl)(phenyl)selane (**4s**) in CDCl<sub>3</sub>.

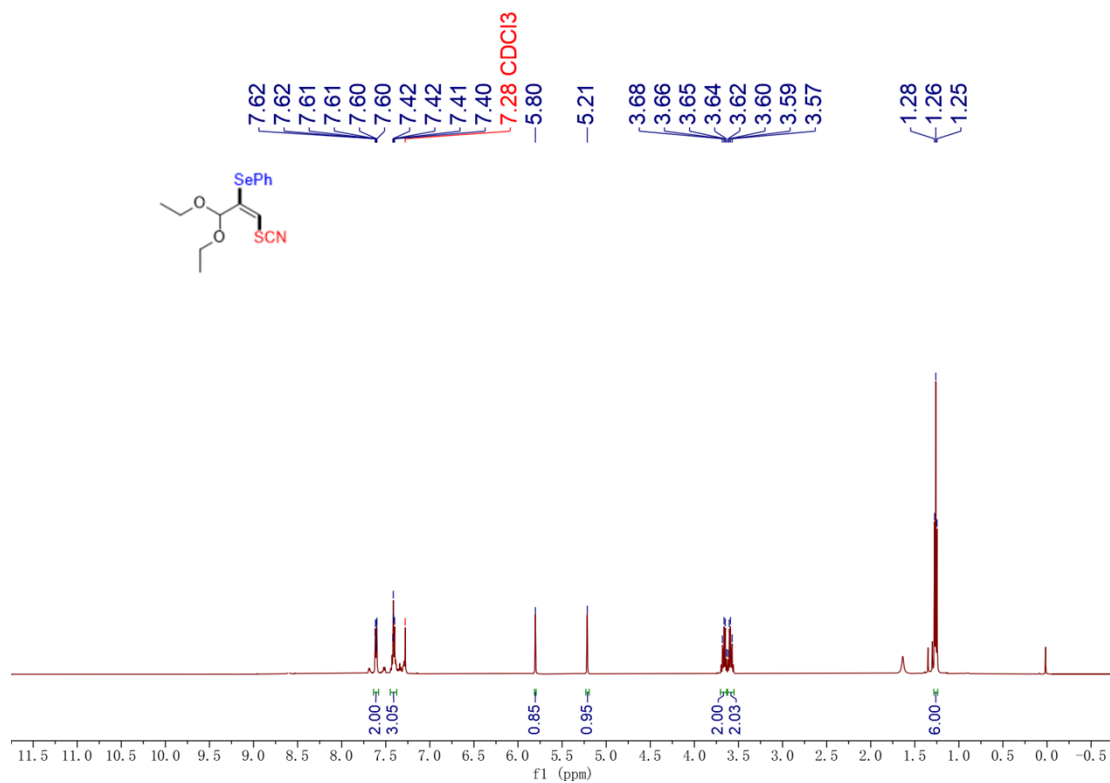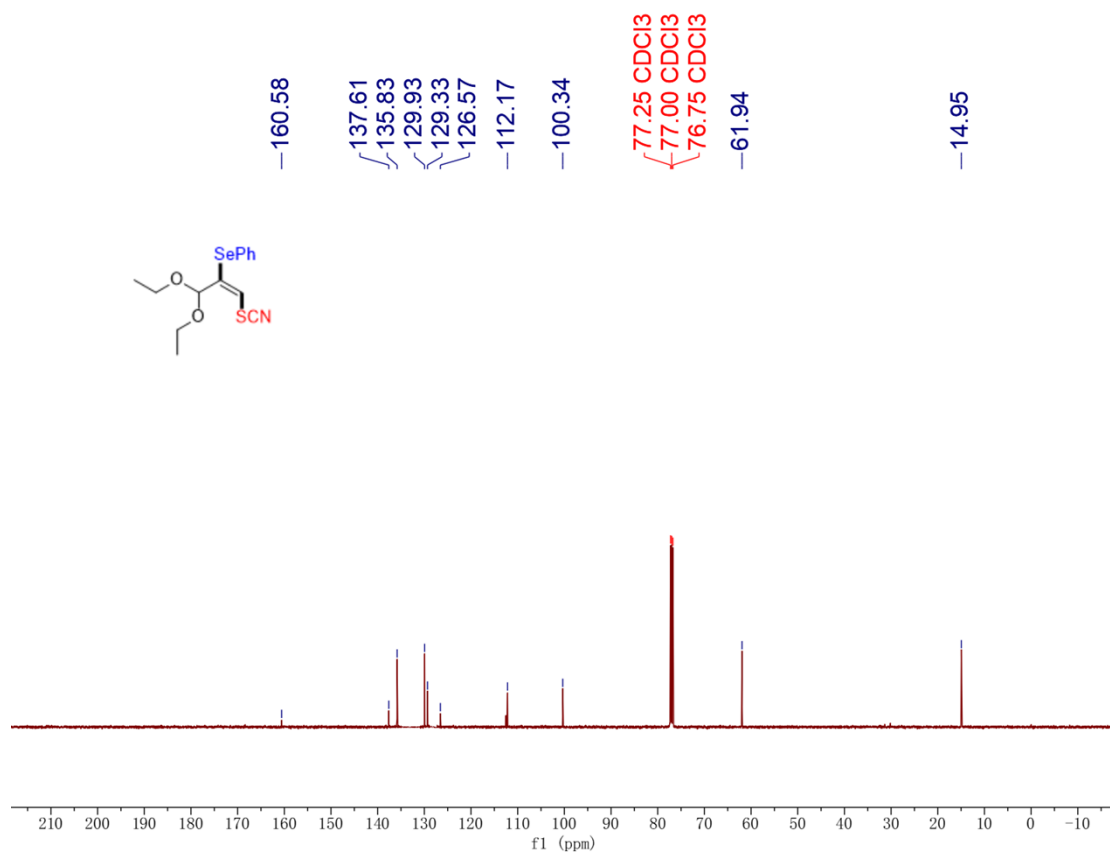

**Figure S20.** The <sup>1</sup>H (500 MHz), <sup>13</sup>C (125 MHz) NMR spectrum for (*E*)-phenyl(1-phenyl-2-thiocyanatobut-1-en-1-yl)selane (**4t**) in CDCl<sub>3</sub>.

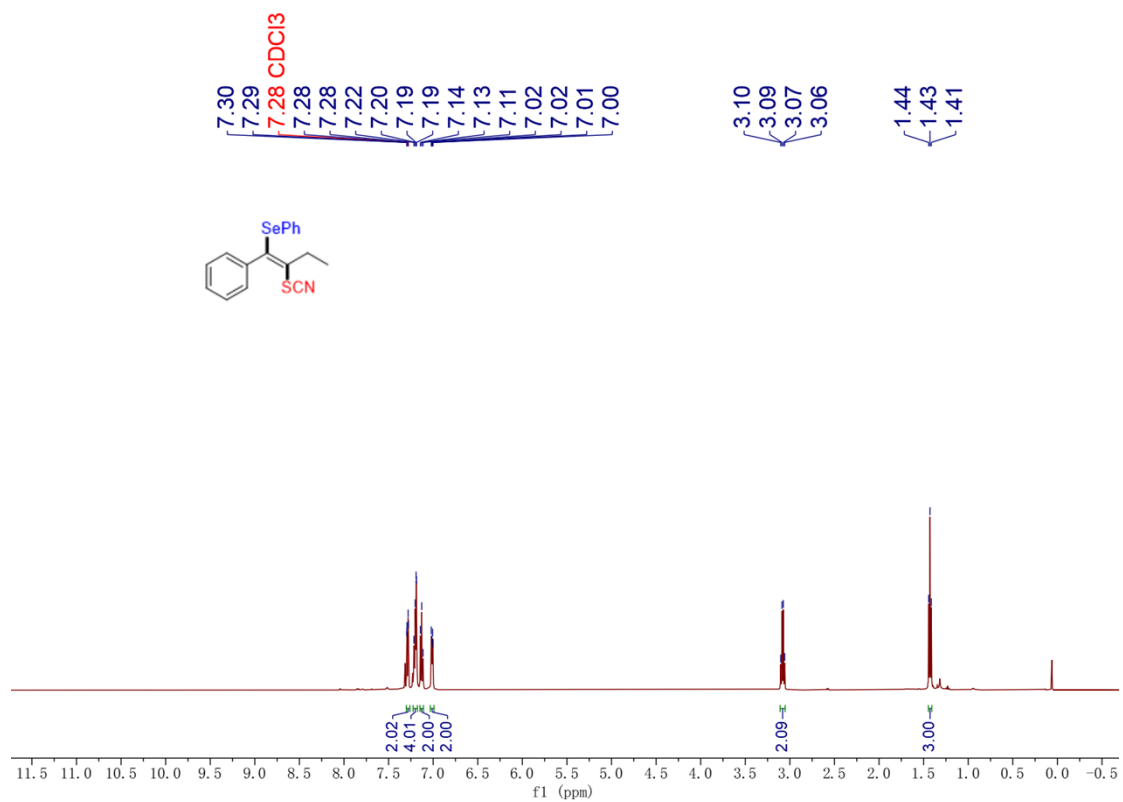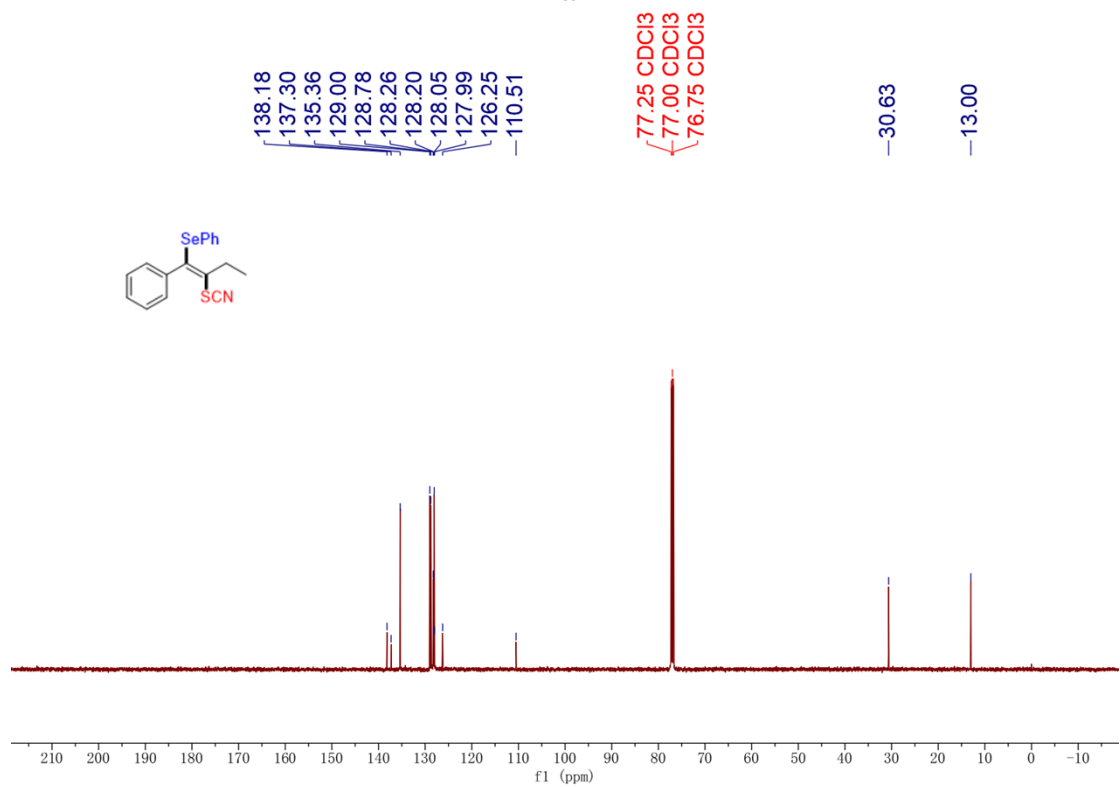

**Figure S21.** The <sup>1</sup>H (500 MHz), <sup>13</sup>C (125 MHz) NMR spectrum for (*E*)-phenyl(6-thiocyanatodec-5-en-5-yl)selane (**4u**) in CDCl<sub>3</sub>.

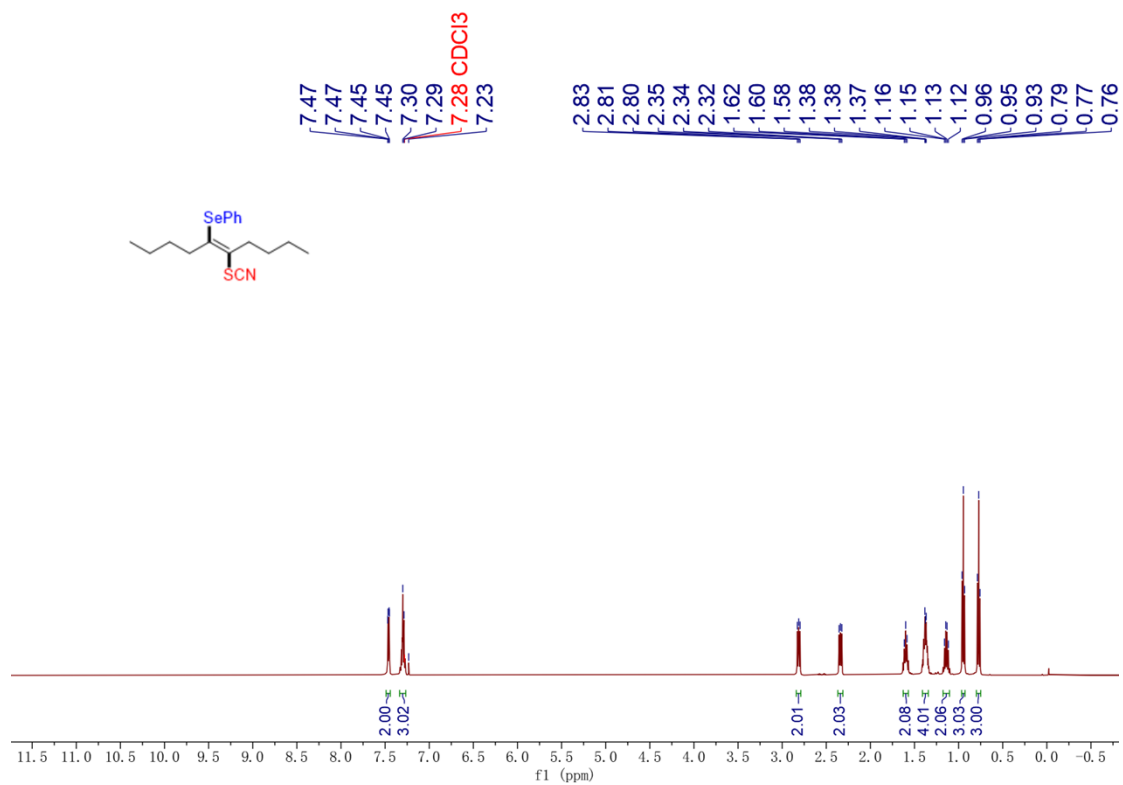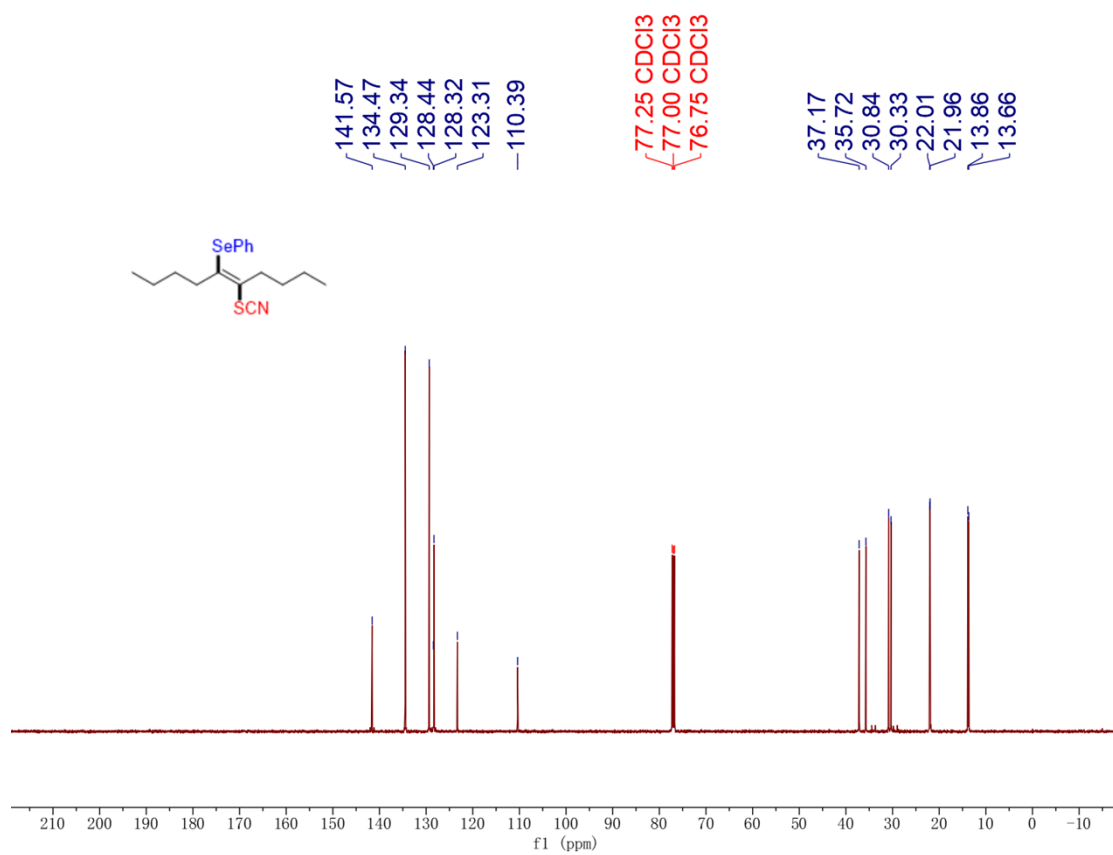

**Figure S22.** The  $^1\text{H}$  (500 MHz),  $^{13}\text{C}$  (125 MHz) NMR spectrum for (*E*)-(4-chlorophenyl)(1-phenyl-2-thiocyanatovinyl)selane (**4v**) in  $\text{CDCl}_3$ .

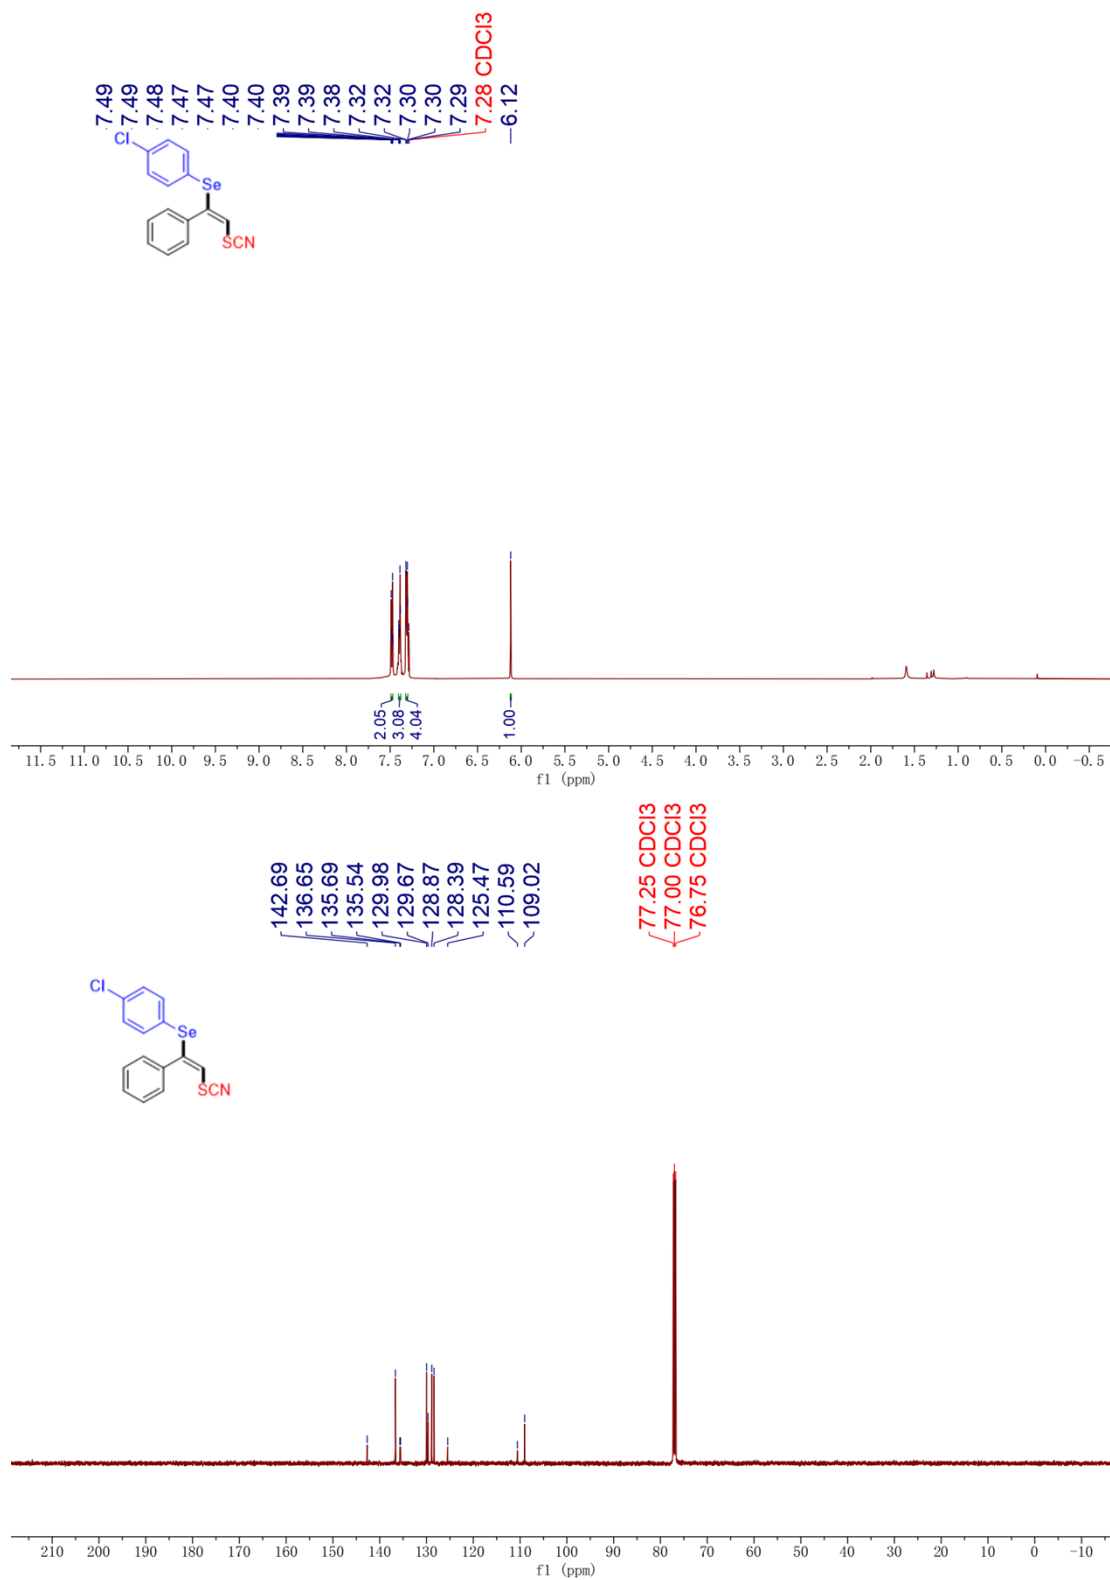

**Figure S23.** The  $^1\text{H}$  (500 MHz),  $^{13}\text{C}$  (125 MHz) NMR spectrum for (*E*)-(1-phenyl-2-thiocyanatovinyl)(p-tolyl)selane (**4w**) in  $\text{CDCl}_3$ .

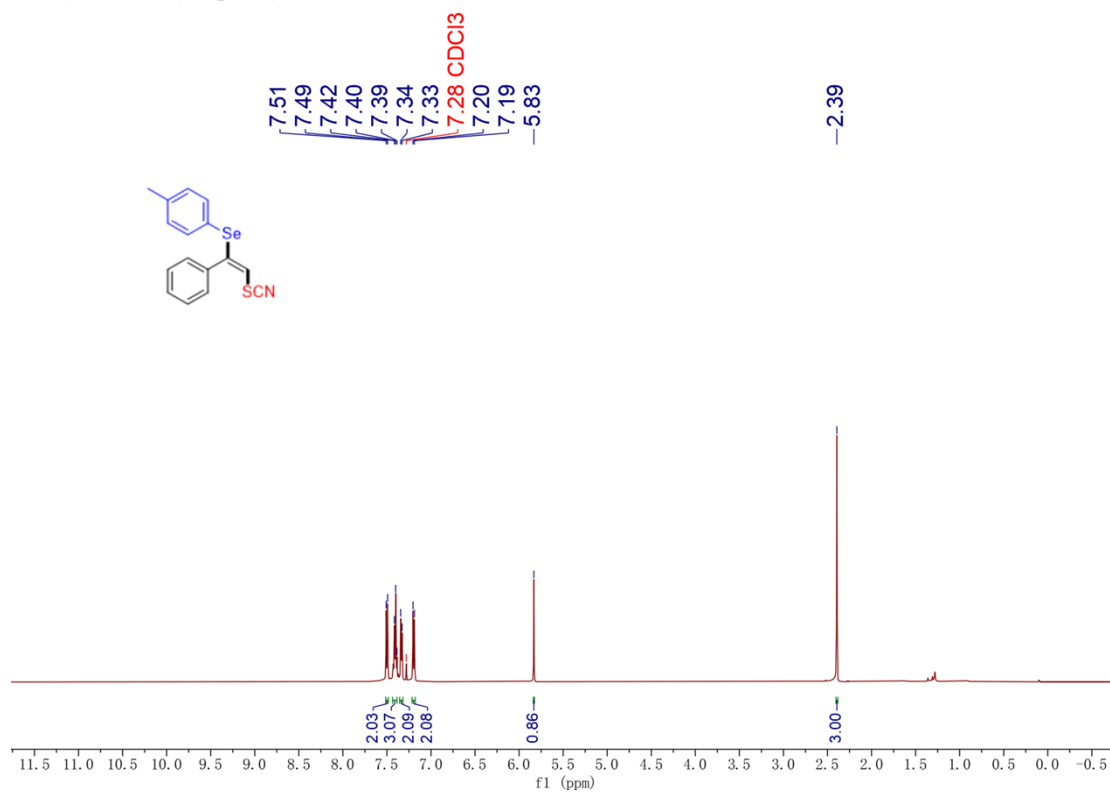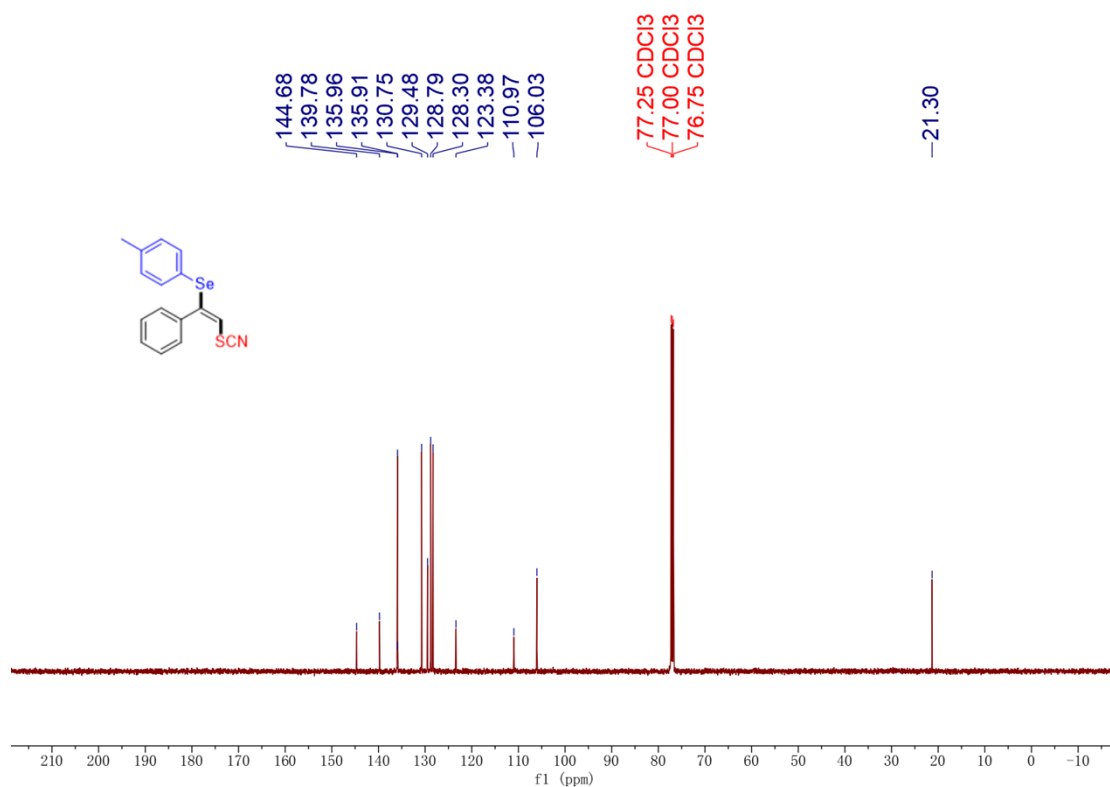

**Figure S24.** The  $^1\text{H}$  (500 MHz),  $^{13}\text{C}$  (125 MHz) NMR spectrum for (*E*)-3-(1-((4-bromophenyl)selanyl)-2-thiocyanatovinyl)pyridine (**4x**) in  $\text{CDCl}_3$ .

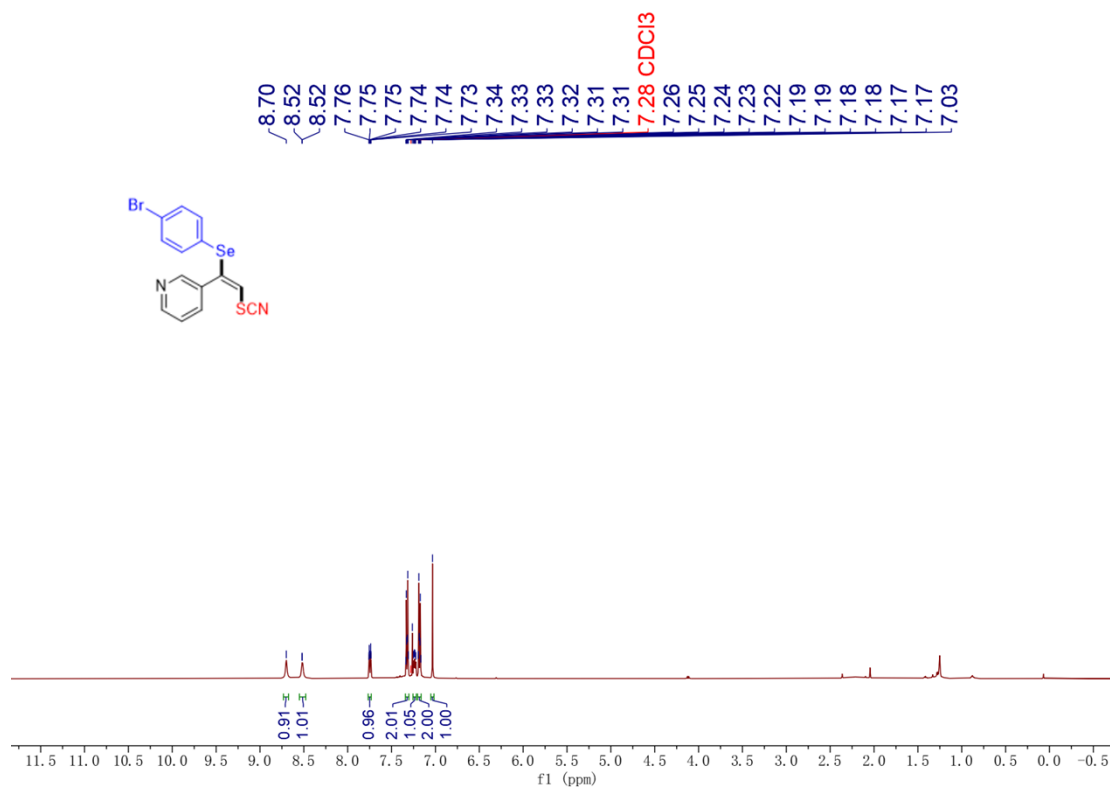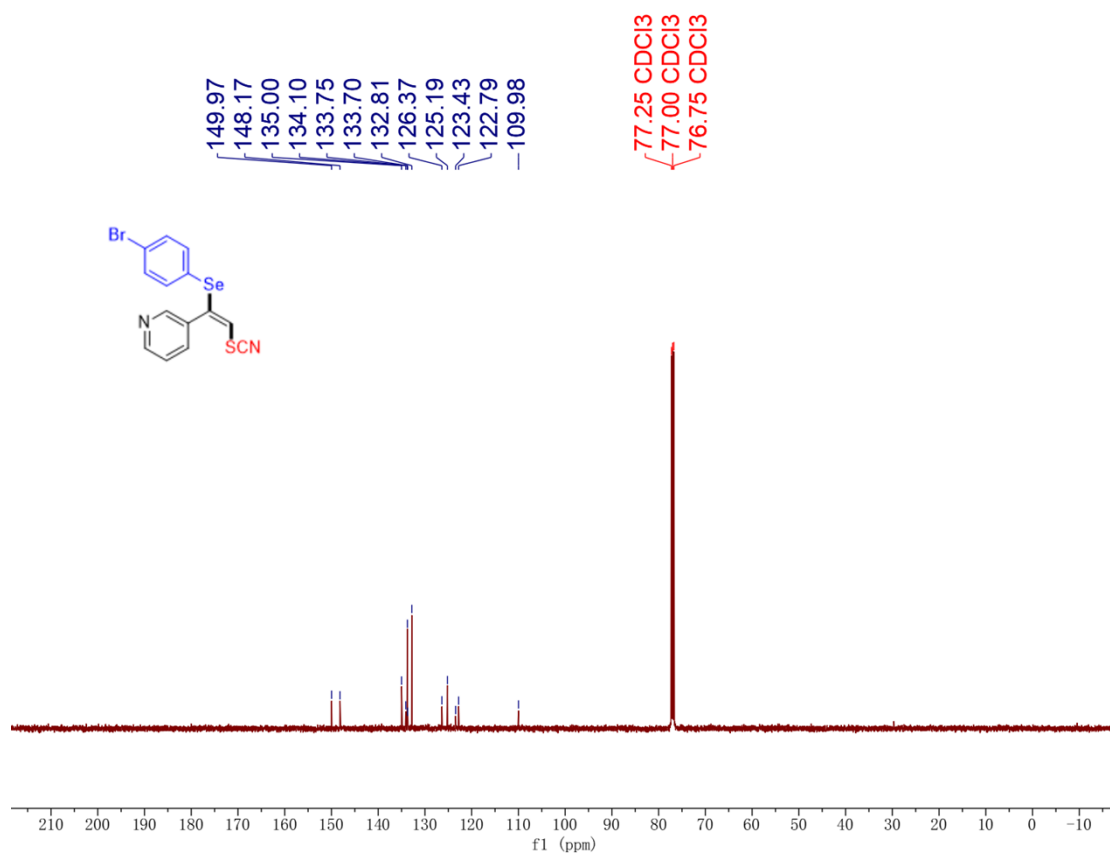



**Figure S25.** The  $^1\text{H}$  (500 MHz),  $^{13}\text{C}$  (125 MHz) NMR spectrum for (*E*)-1-(4-bromophenyl)-2-thiocyanatovinyl(methyl)selane (**4y**) in  $\text{CDCl}_3$ .

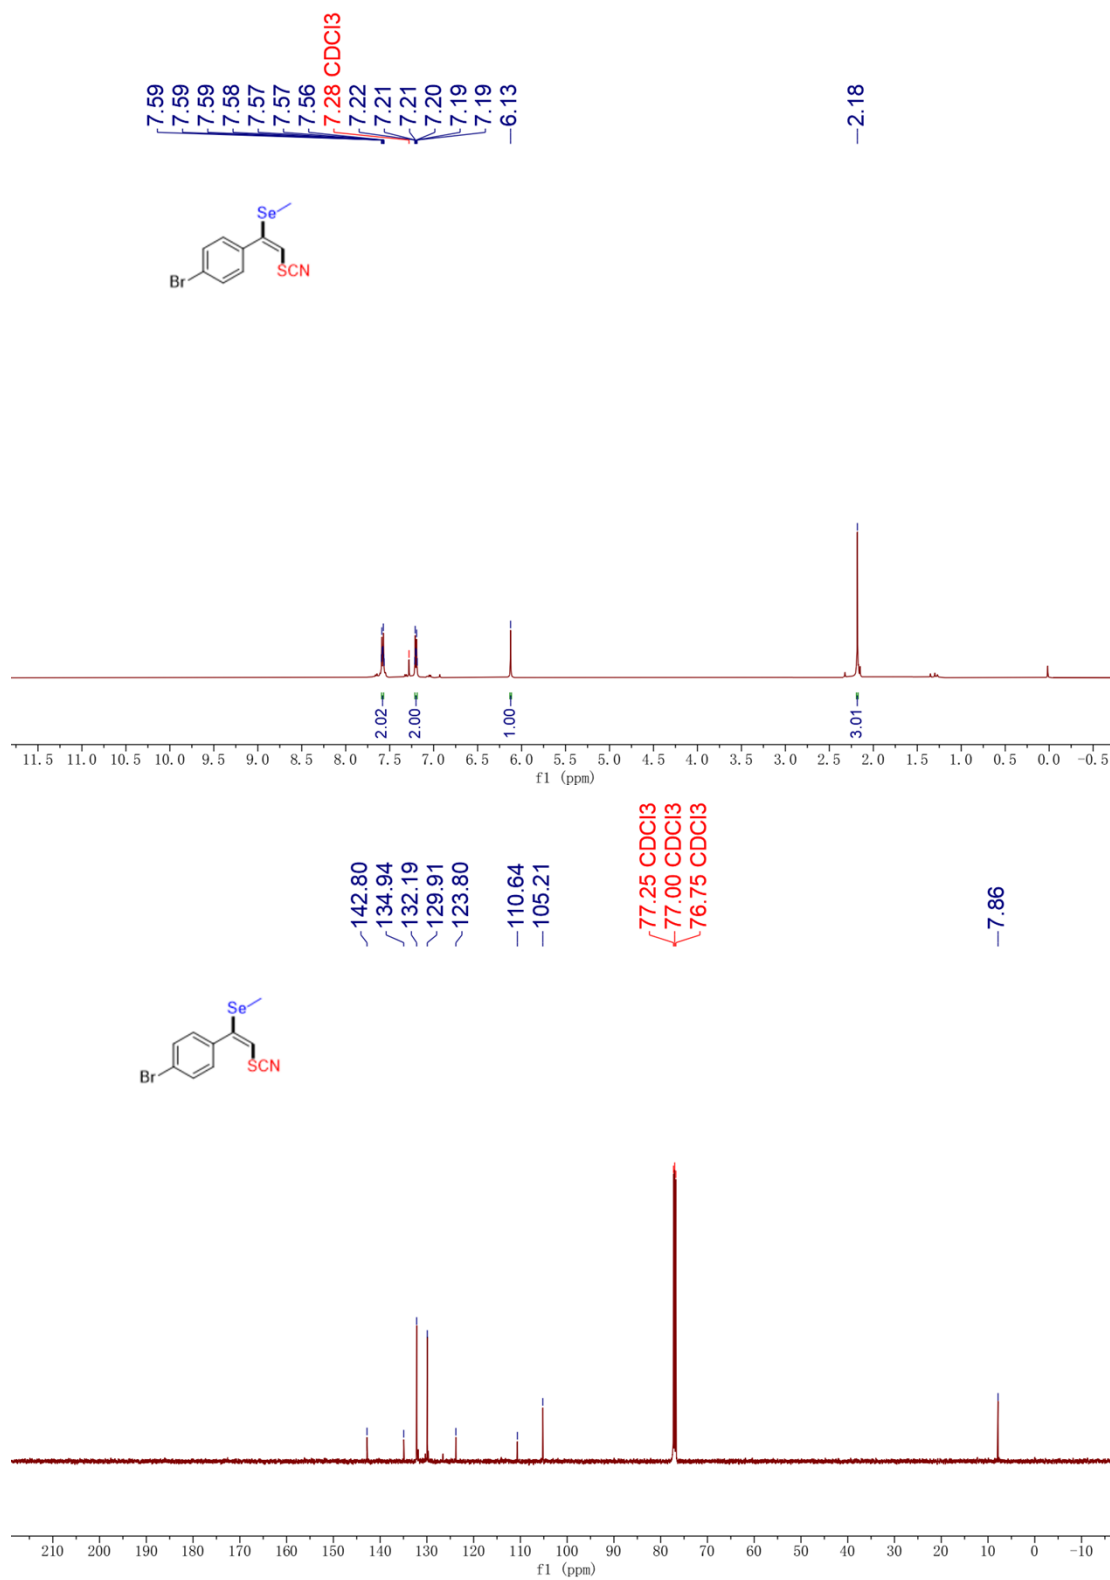

**Figure S26.** The  $^1\text{H}$  (500 MHz),  $^{13}\text{C}$  (125 MHz) NMR spectrum for ethyl(*E*)-(1-(2-bromophenyl)-2-thiocyanatovinyl)(methyl)selane (**4z**) in  $\text{CDCl}_3$ .

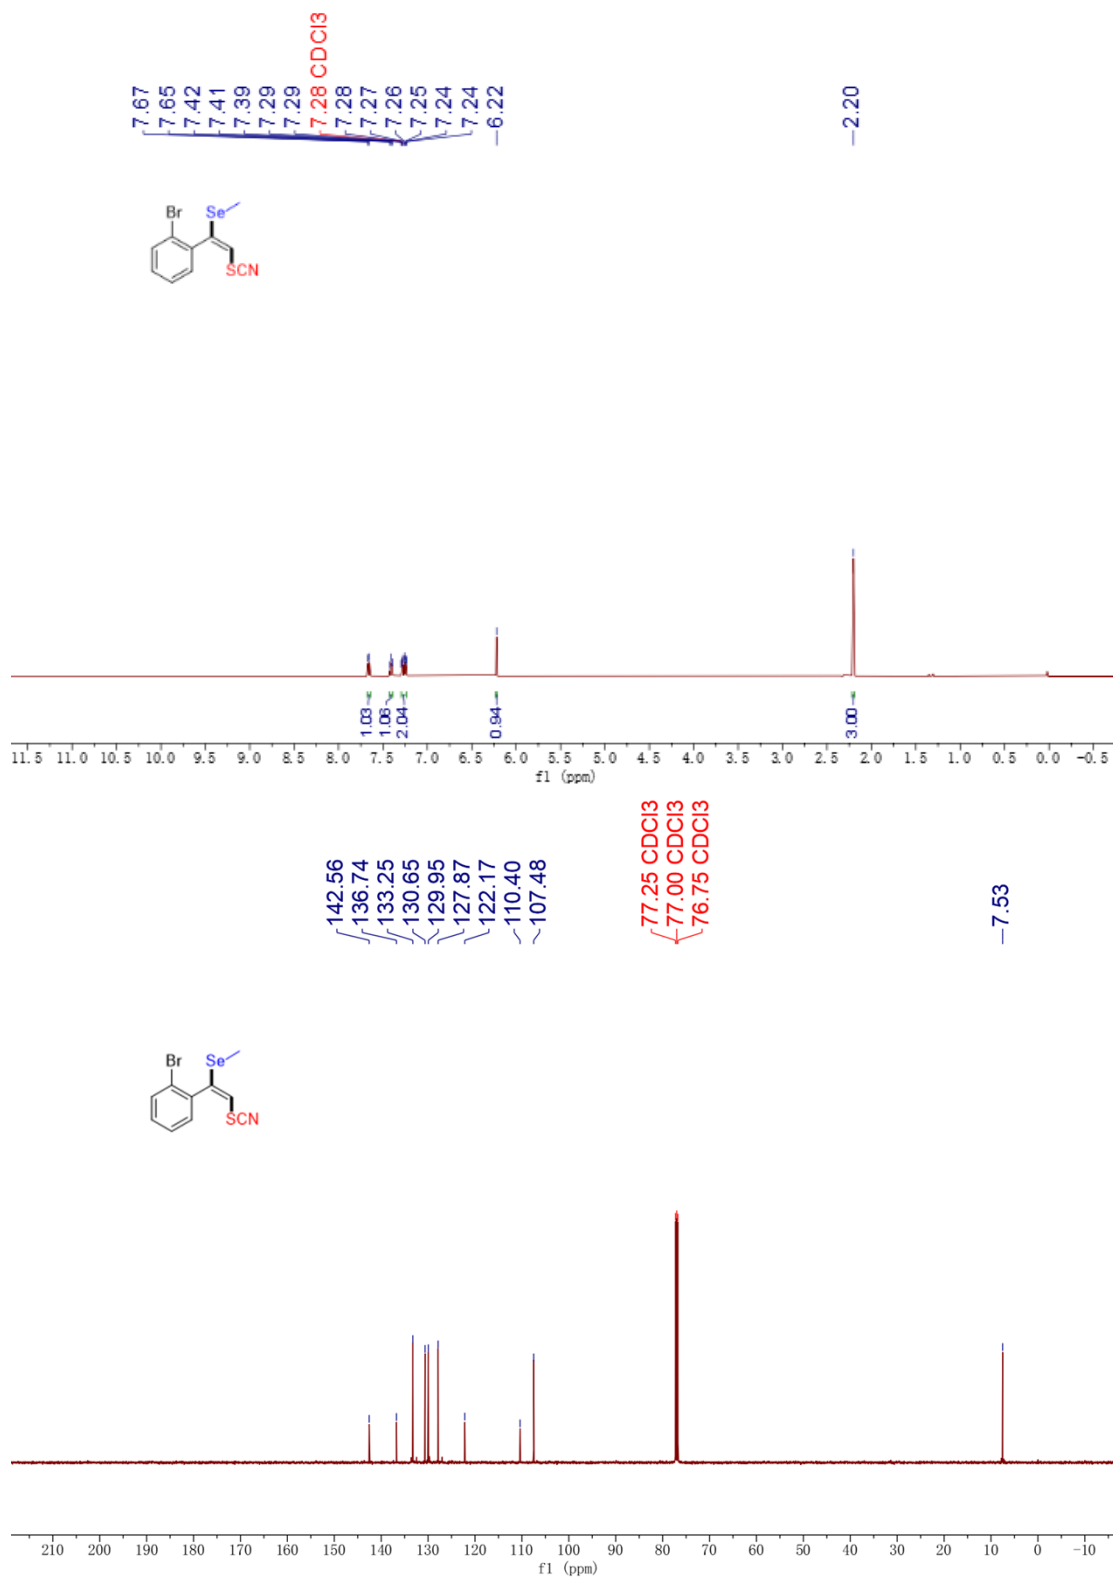

**Figure S27.** The  $^1\text{H}$  (500 MHz),  $^{13}\text{C}$  (125 MHz) NMR spectrum for (*E*)-3-(1-(methylselanyl)-2-thiocyanatovinyl)pyridine (**4aa**) in  $\text{CDCl}_3$ .

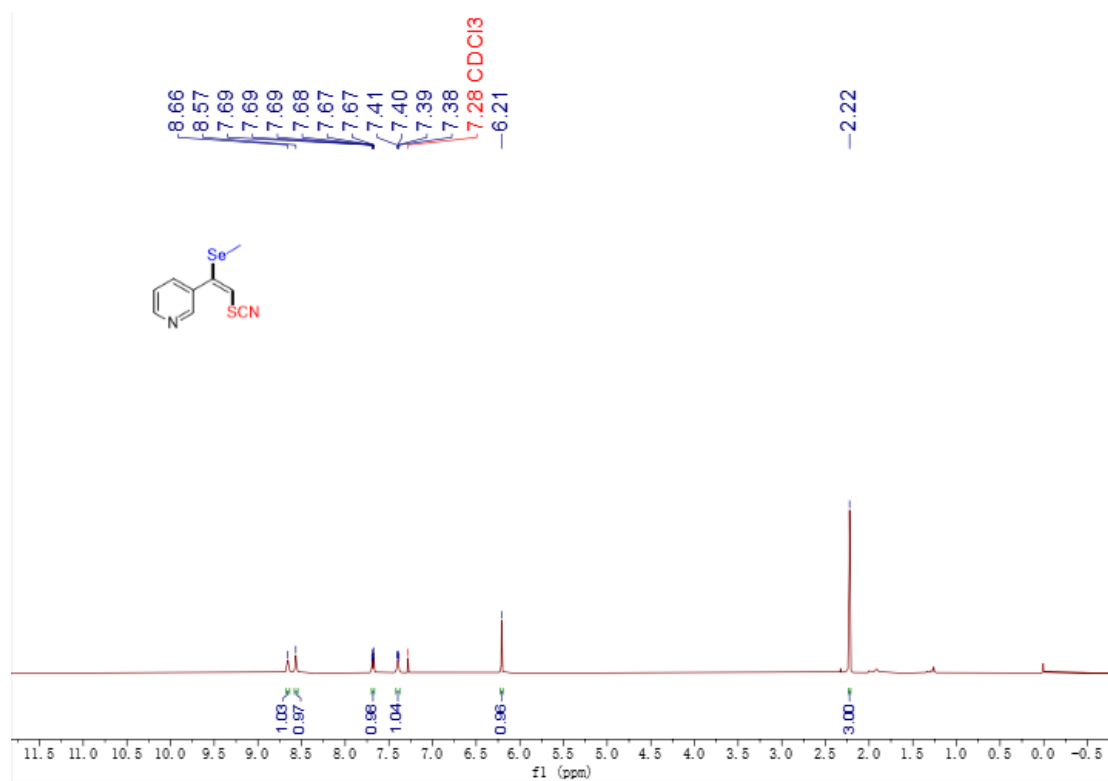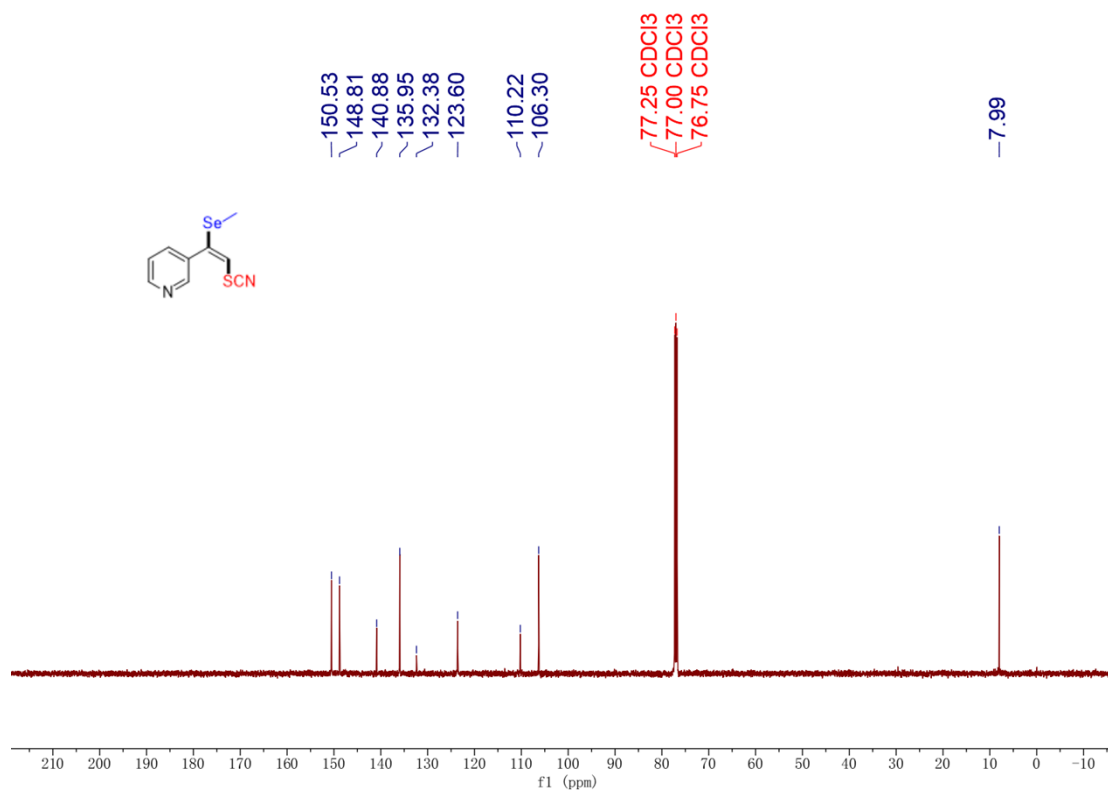

**Figure S28.** The  $^1\text{H}$  (500 MHz),  $^{13}\text{C}$  (125 MHz) NMR spectrum for (*E*)-benzyl(1-phenyl-2-thiocyanatovinyl)selane (**4ab**) in  $\text{CDCl}_3$ .

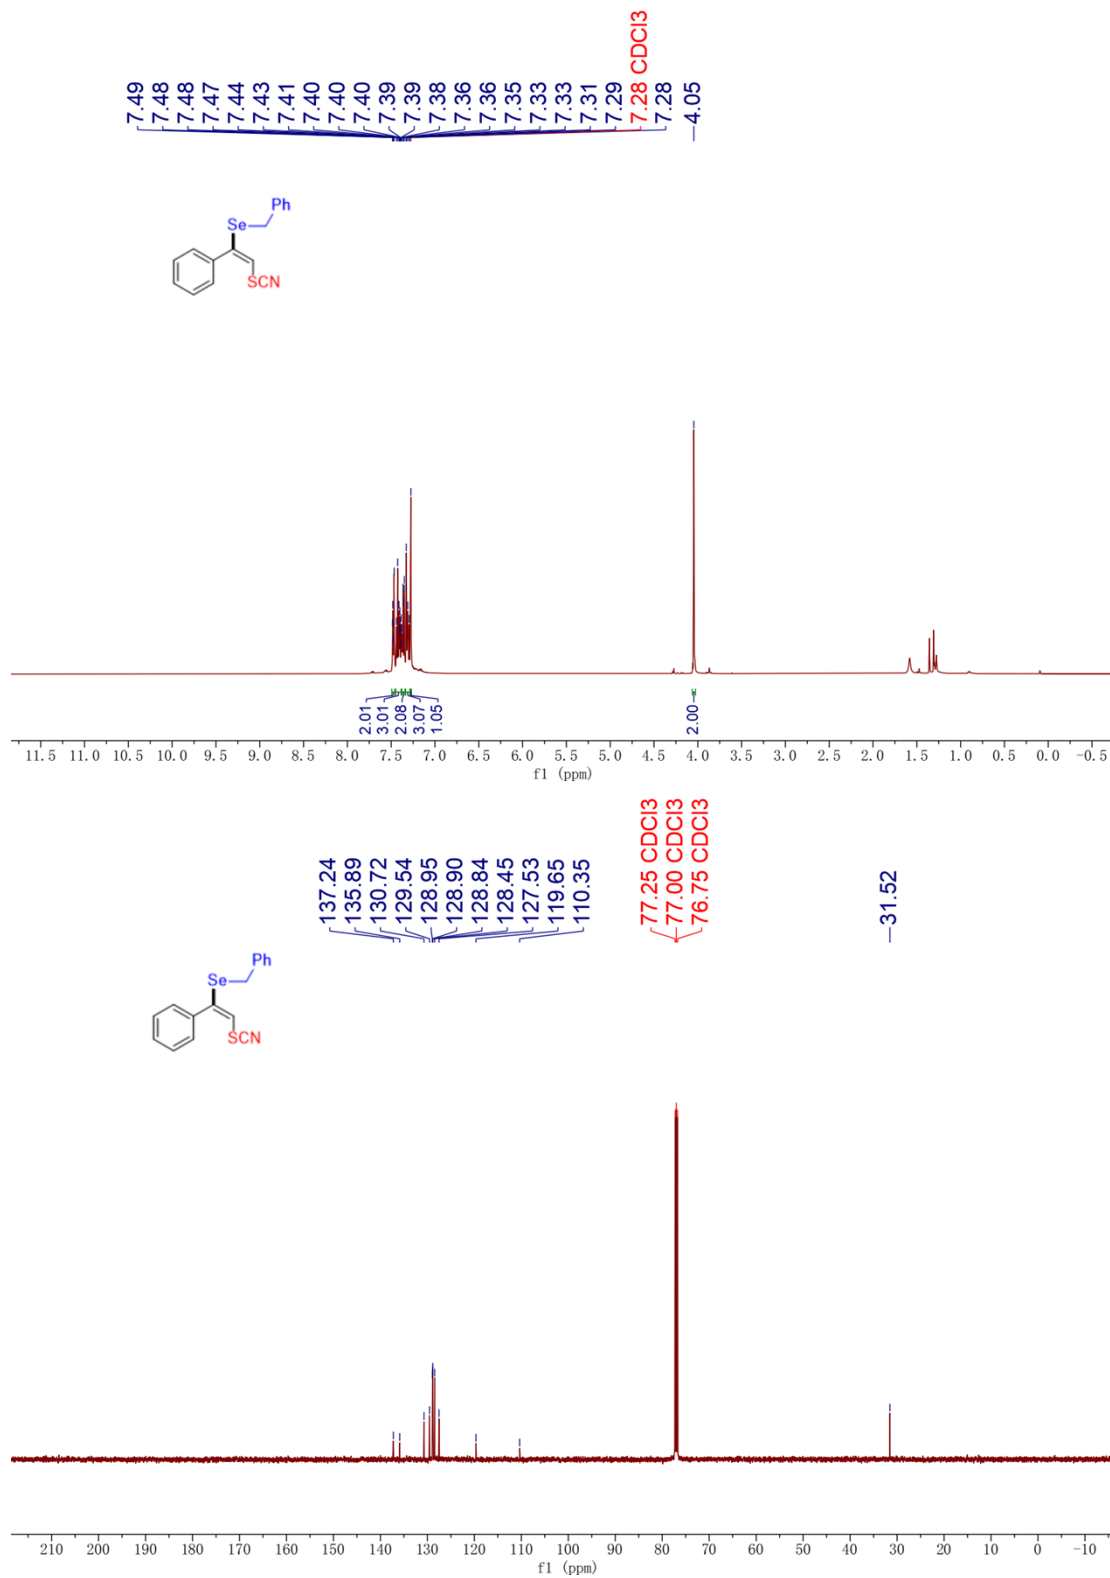

**Figure S29.** The  $^1\text{H}$  (500 MHz),  $^{13}\text{C}$  (125 MHz) NMR spectrum for (1*R*,2*S*,4*R*)-4,7,7-trimethylbicyclo[2.2.1]heptan-2-yl 4-((*E*)-1-(phenylselanyl)-2-thiocyanatovinyl)benzoate (**4ac**) in  $\text{CDCl}_3$ .

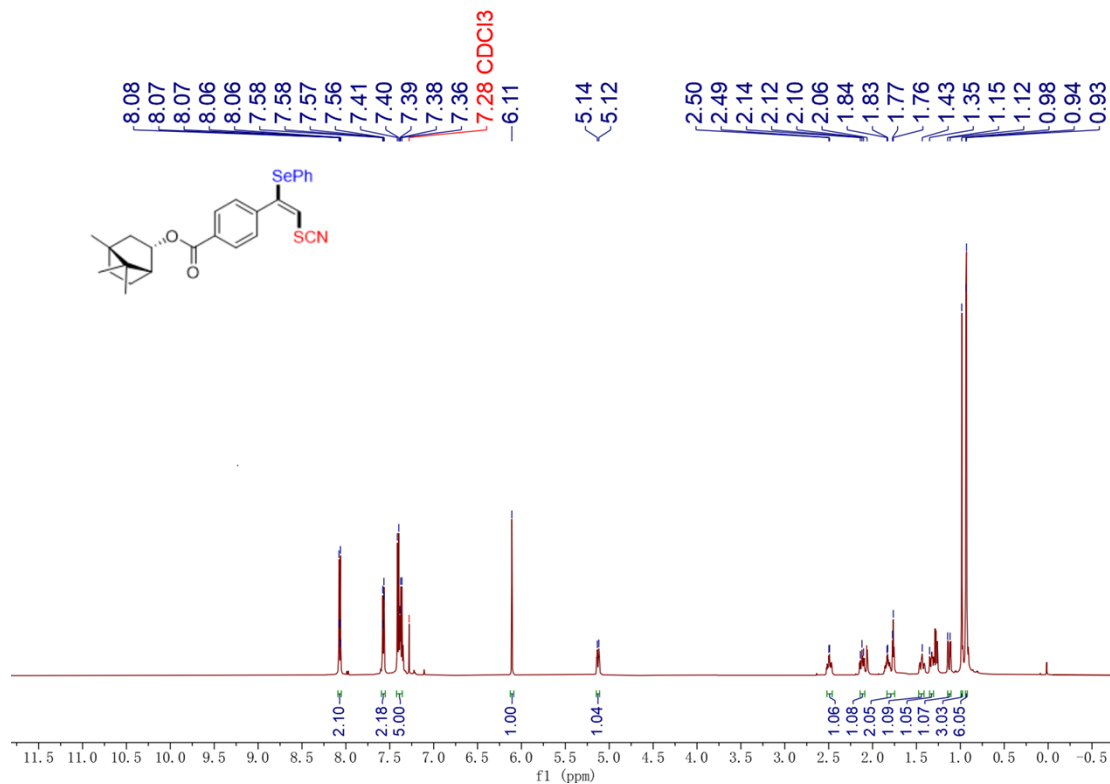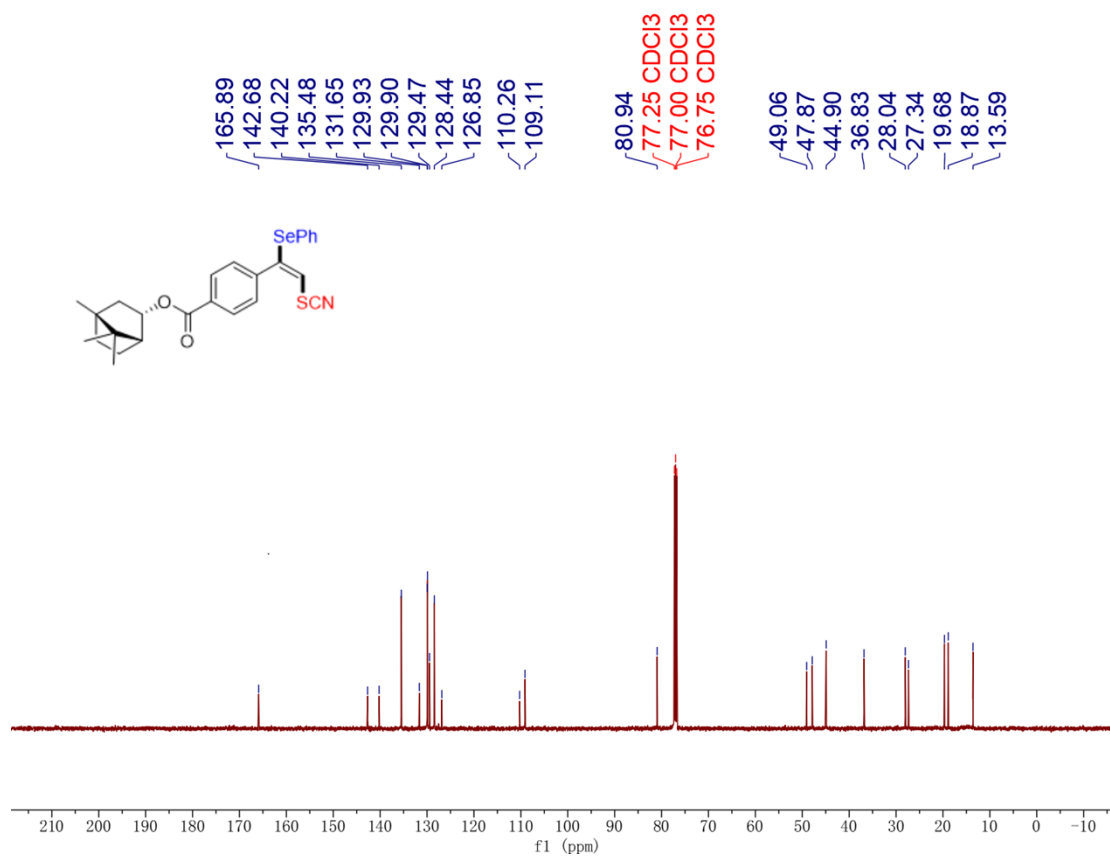

**Figure S30.** The  $^1\text{H}$  (500 MHz),  $^{13}\text{C}$  (125 MHz) NMR spectrum for (1*S*,2*R*,5*S*)-2-isopropyl-5-methylcyclohexyl 4-((*E*)-1-(phenylselanyl)-2-thiocyanatovinyl) benzoate (**4ad**) in  $\text{CDCl}_3$ .

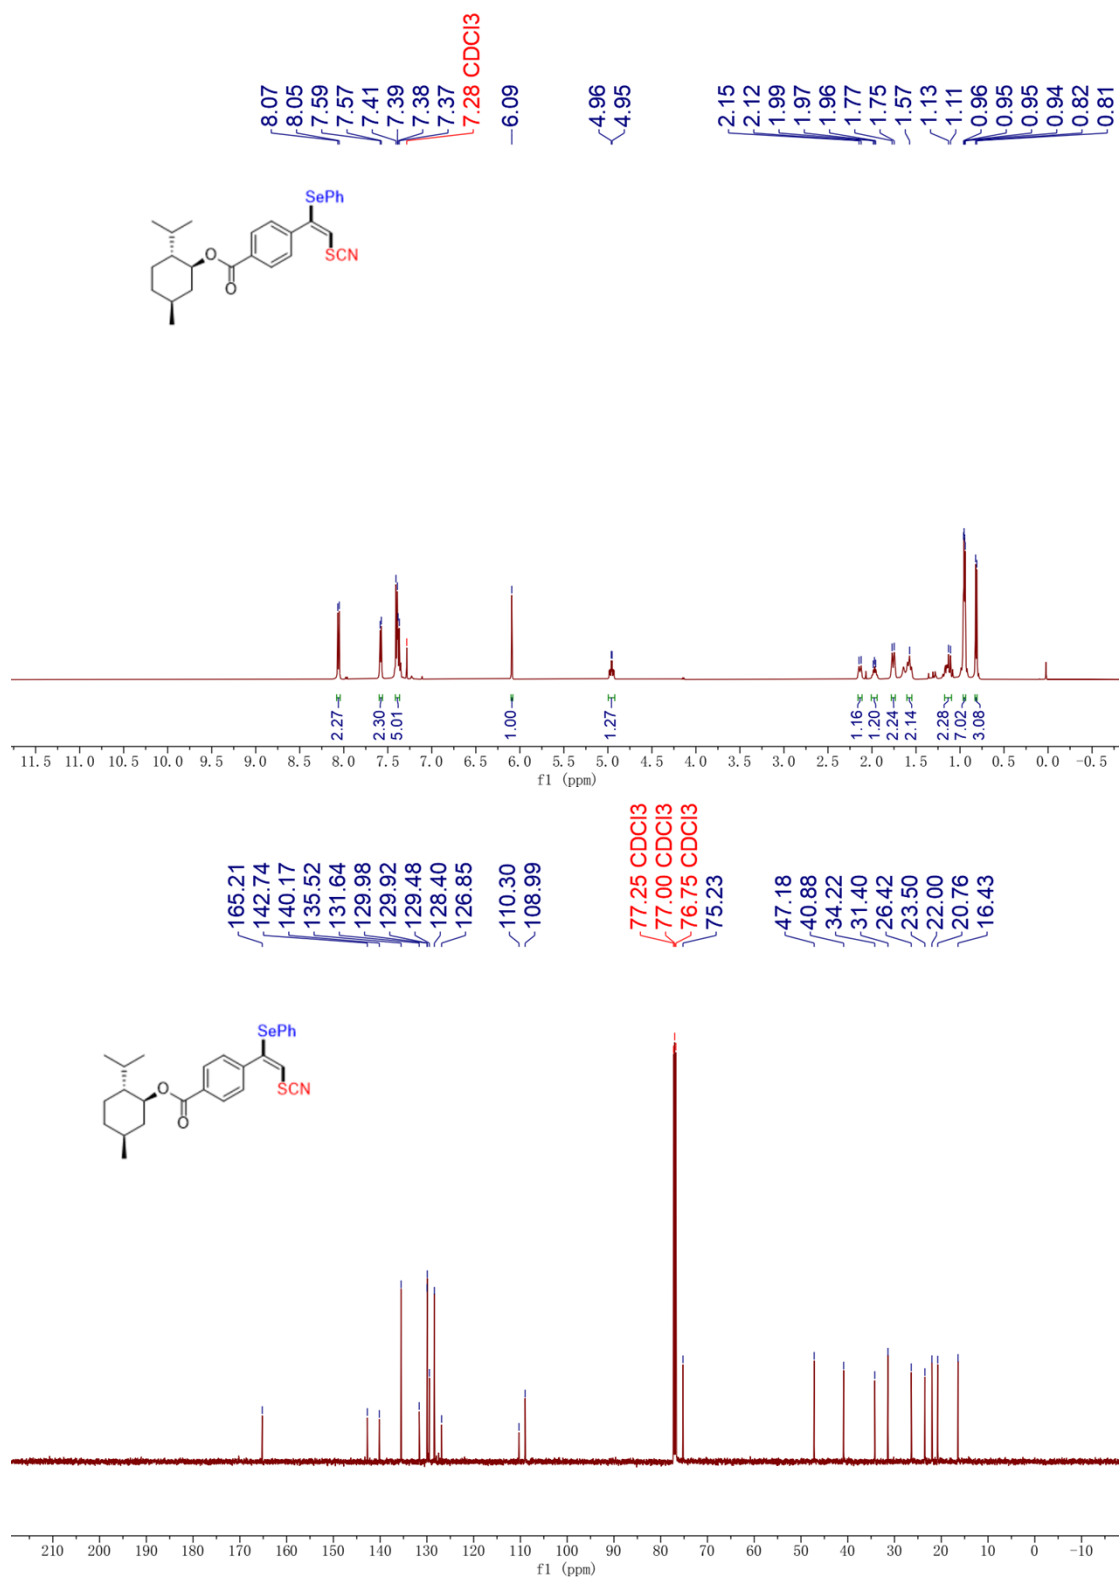

**Figure S31.** The  $^1\text{H}$  (500 MHz),  $^2\text{H}$  (500 MHz) and  $^{13}\text{C}$  (125 MHz) NMR spectrum for (*E*)-phenyl(1-phenyl-2-thiocyanatovinyl-2-d)selane (**4a-D**) in  $\text{CDCl}_3$ .

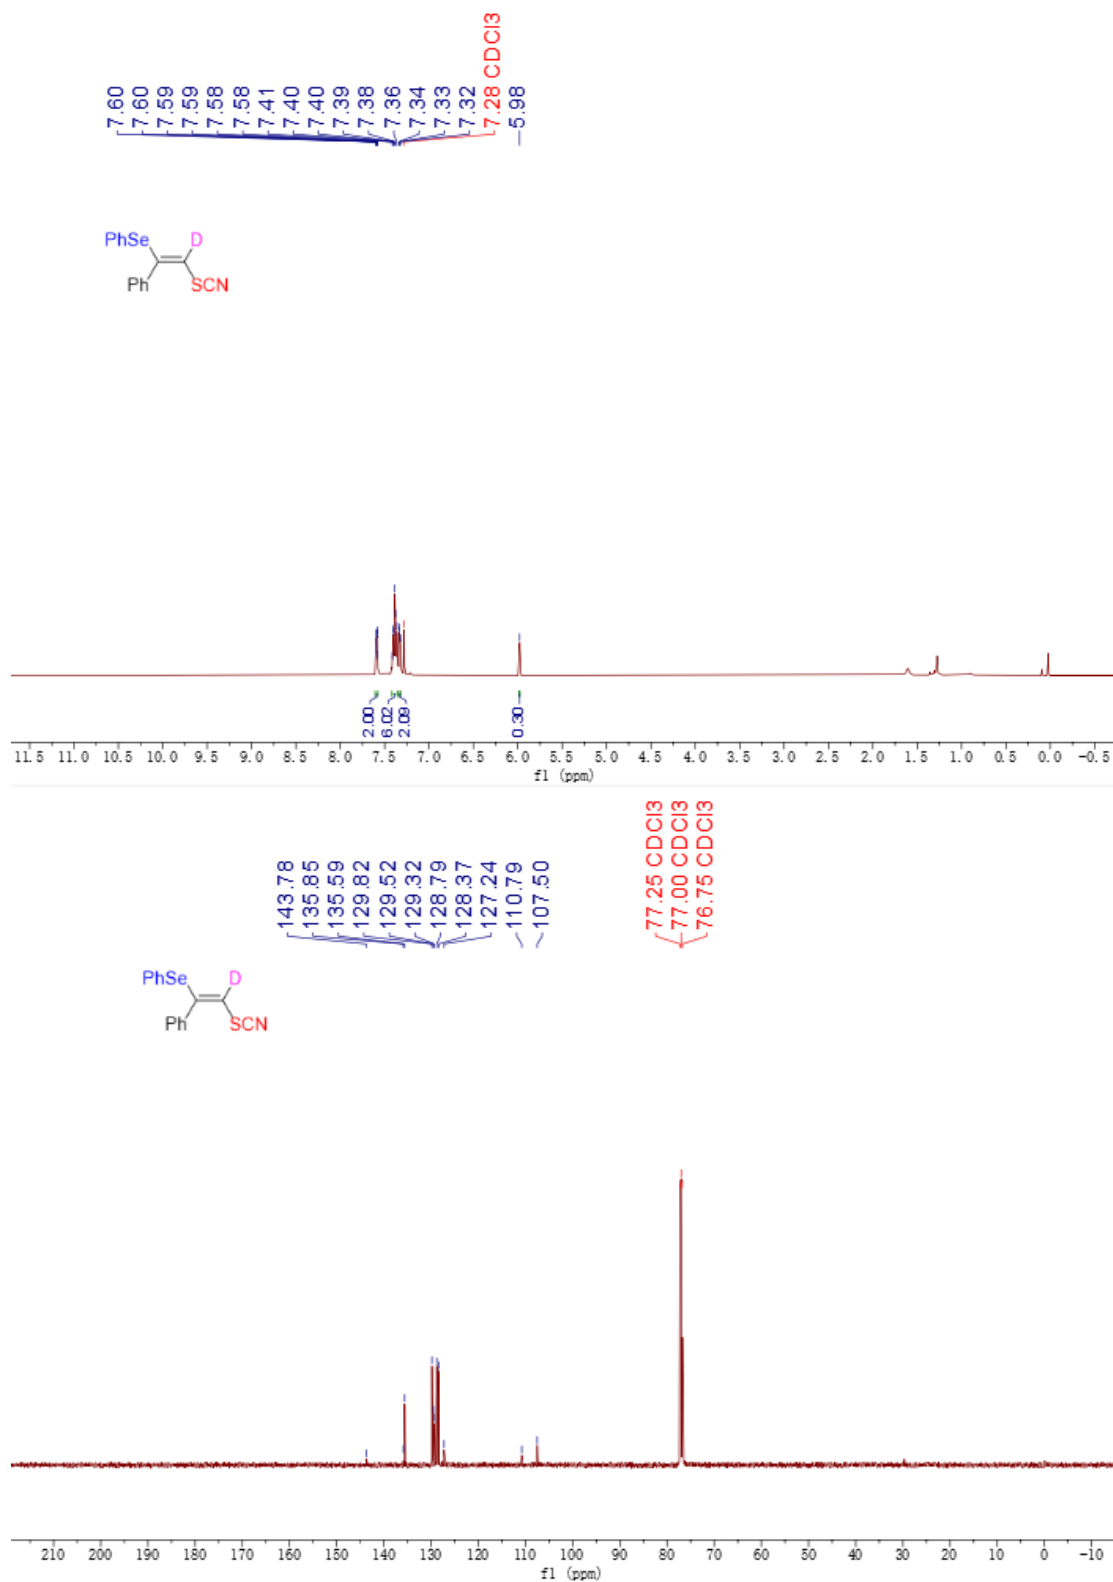

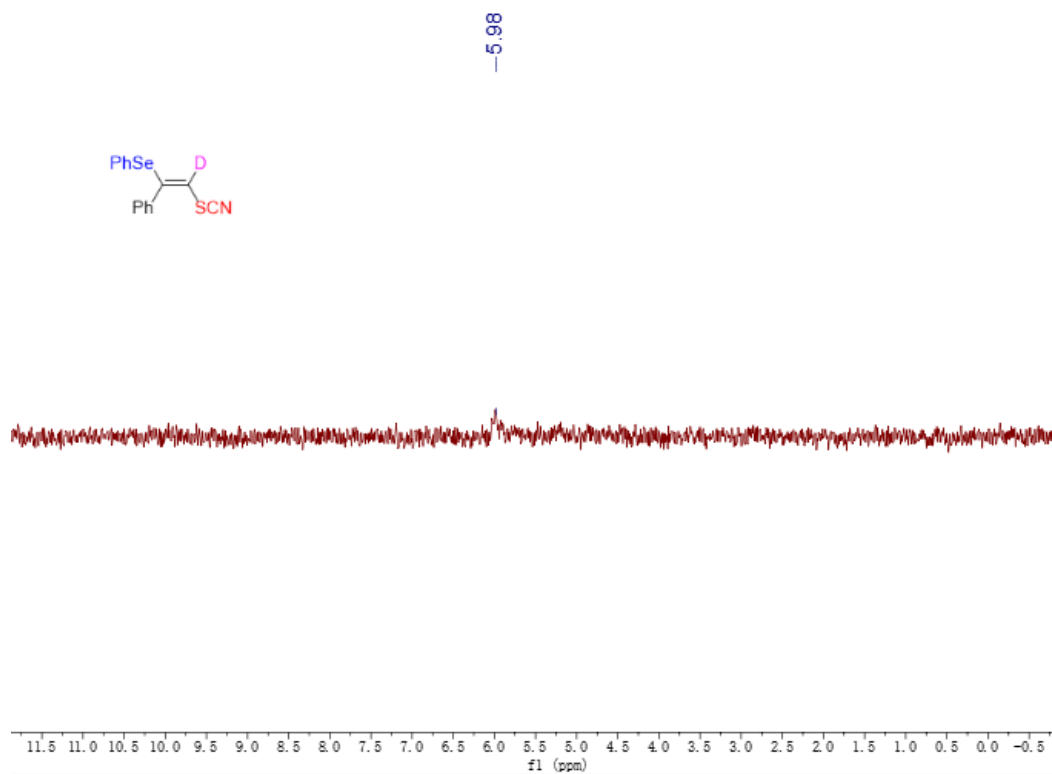

**Figure S32.** The  $^1\text{H}$  (500 MHz),  $^{13}\text{C}$  (125 MHz) NMR spectrum for (E)-phenyl(2-phenyl-2-(phenylselanyl)vinyl)sulfane (**6a**) in  $\text{CDCl}_3$ .

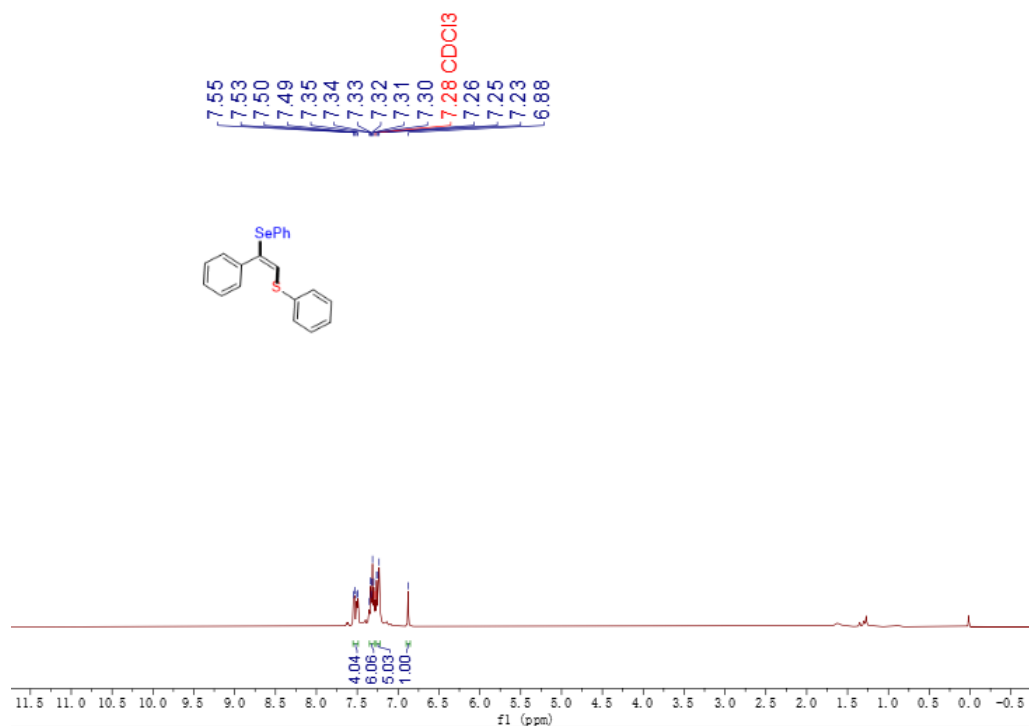



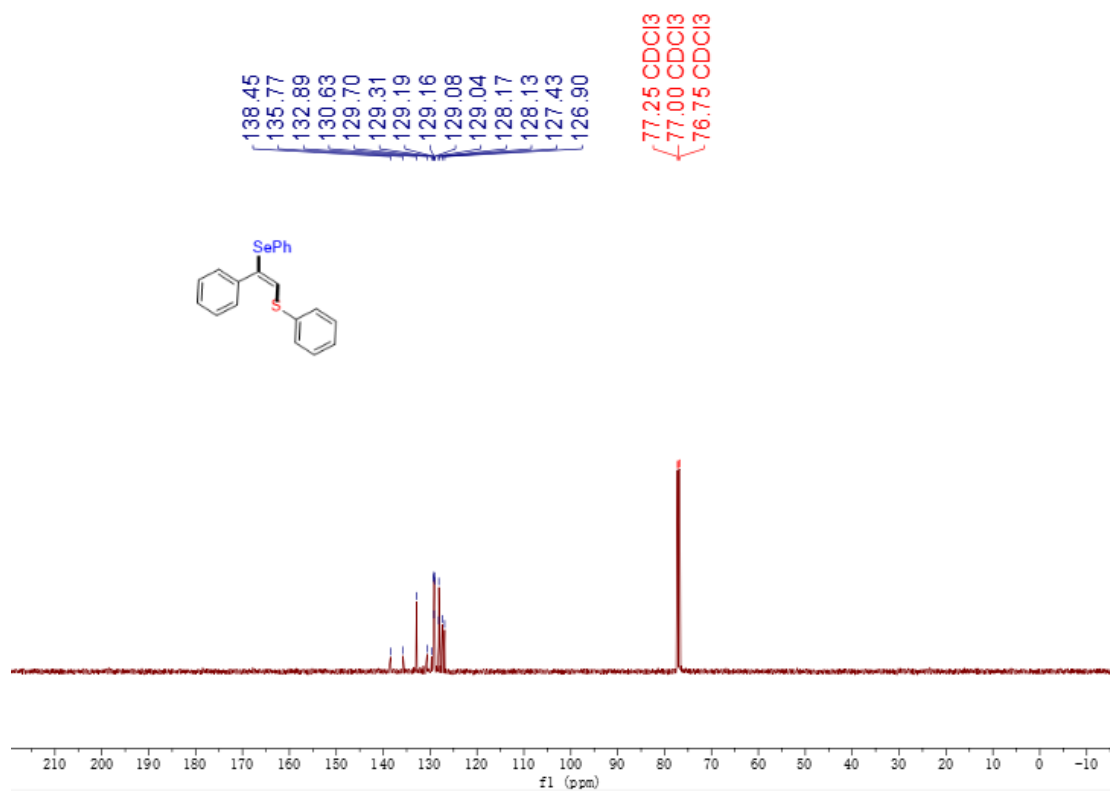

**Figure S33.** The  $^1\text{H}$  (500 MHz),  $^{13}\text{C}$  (125 MHz) NMR spectrum for (*E*)-4-(1-(phenylselanyl)-2-(phenylthio)vinyl)benzotrile (**6b**) in  $\text{CDCl}_3$ .

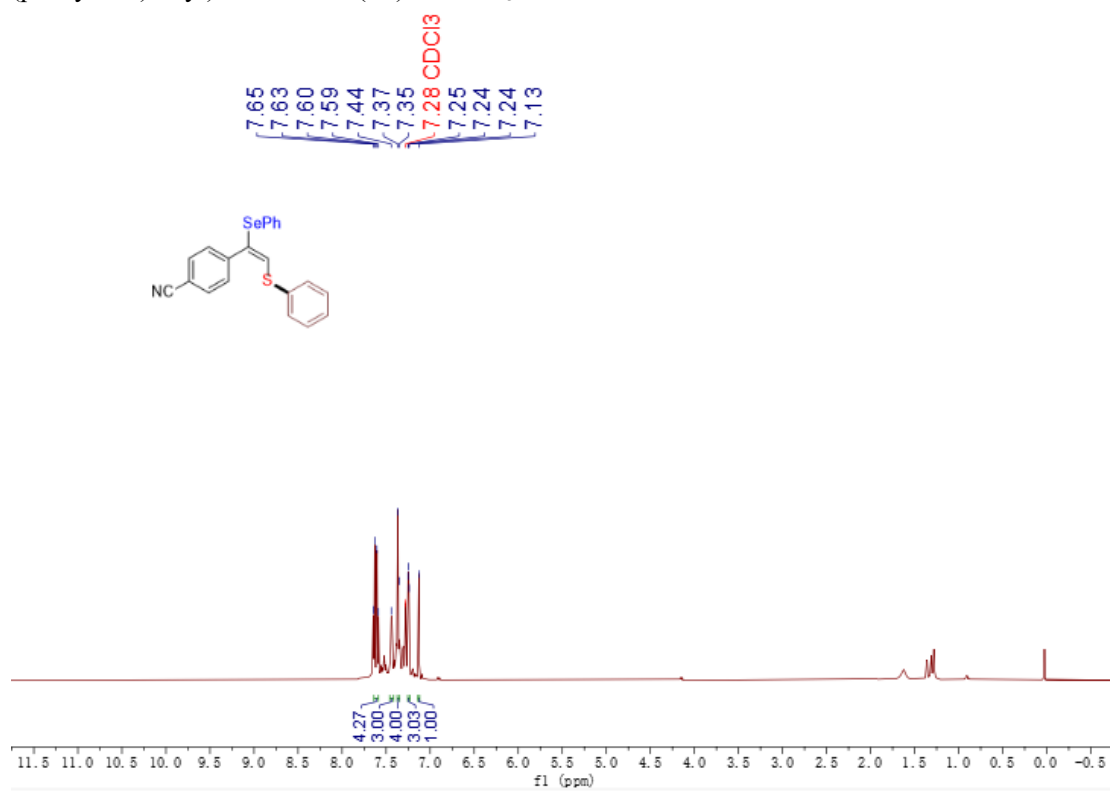

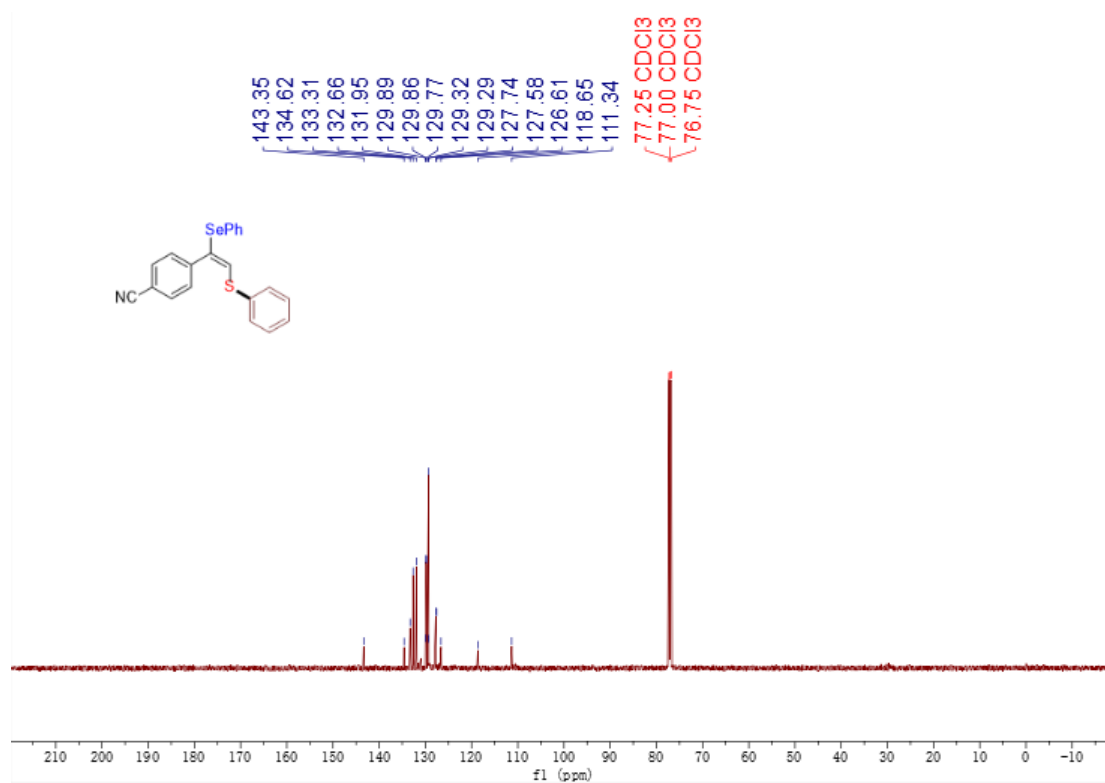

**Figure S34.** The <sup>1</sup>H (500 MHz), <sup>13</sup>C (125 MHz) NMR spectrum for (*E*)-2-(4-bromophenyl)-2-(phenylselanyl)vinyl(phenyl)sulfane (**6c**) in CDCl<sub>3</sub>.

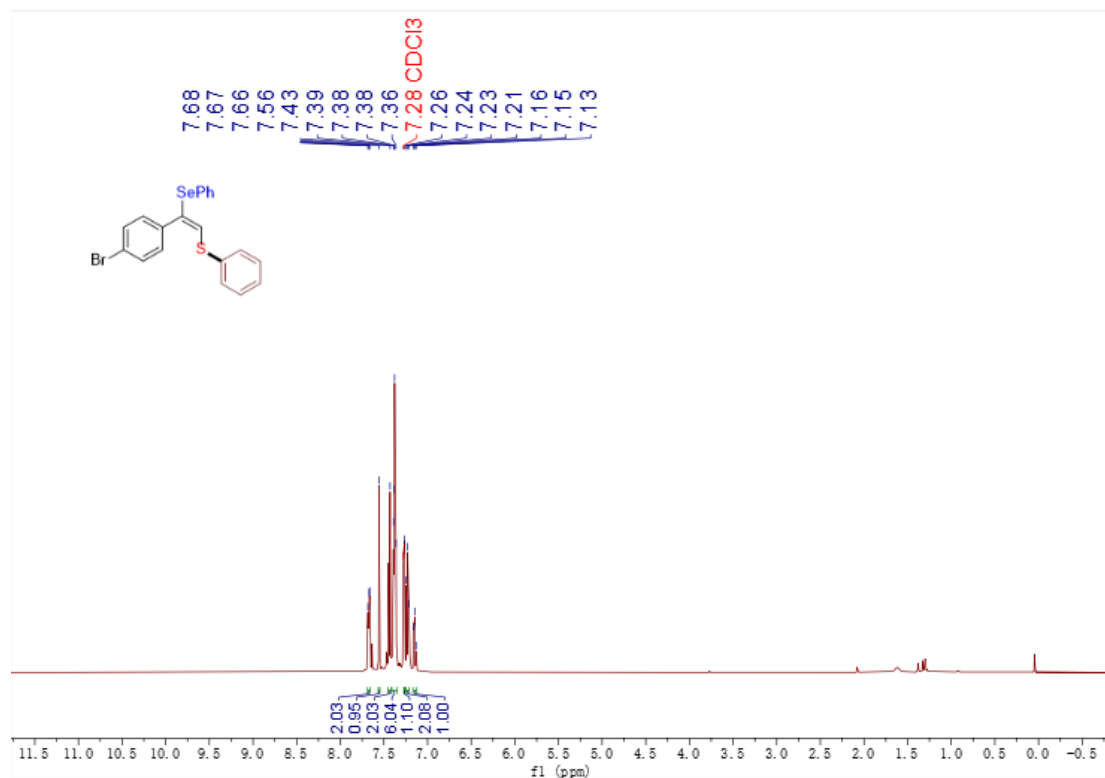

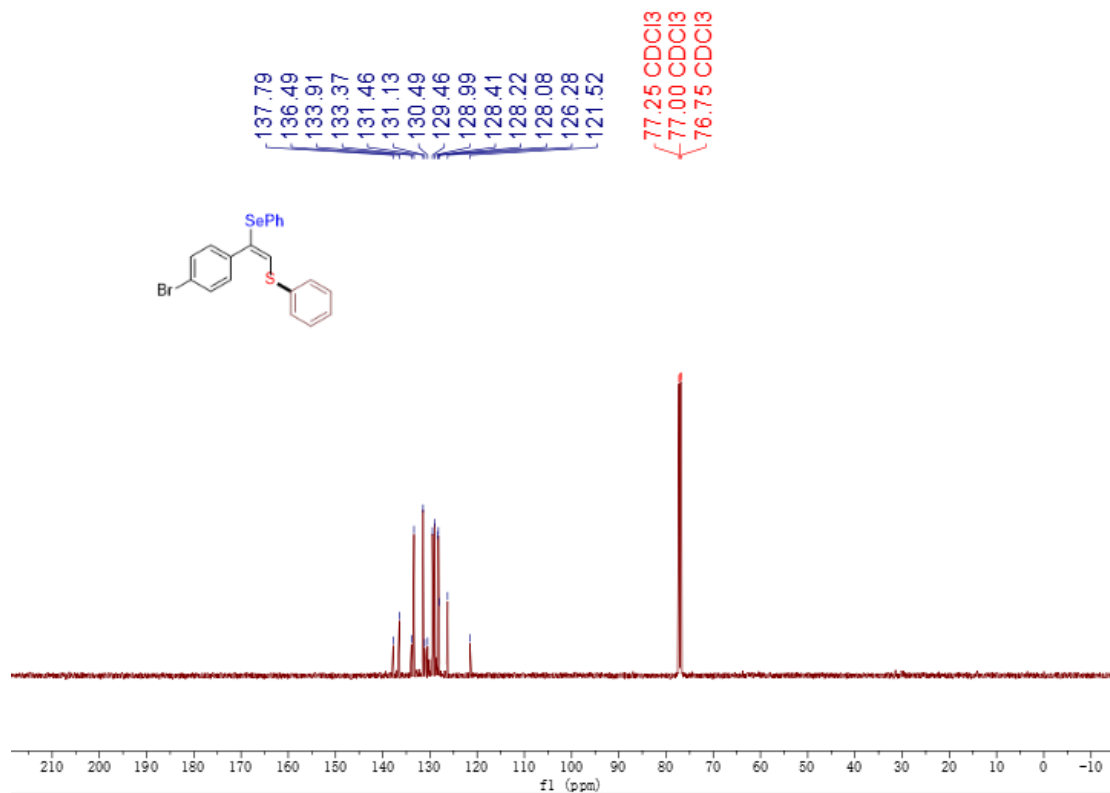

**Figure S35.** The <sup>1</sup>H (500 MHz), <sup>13</sup>C (125 MHz) NMR spectrum for (2,2-diphenylvinyl)(phenyl)selenane (**8'**) in CDCl<sub>3</sub>.

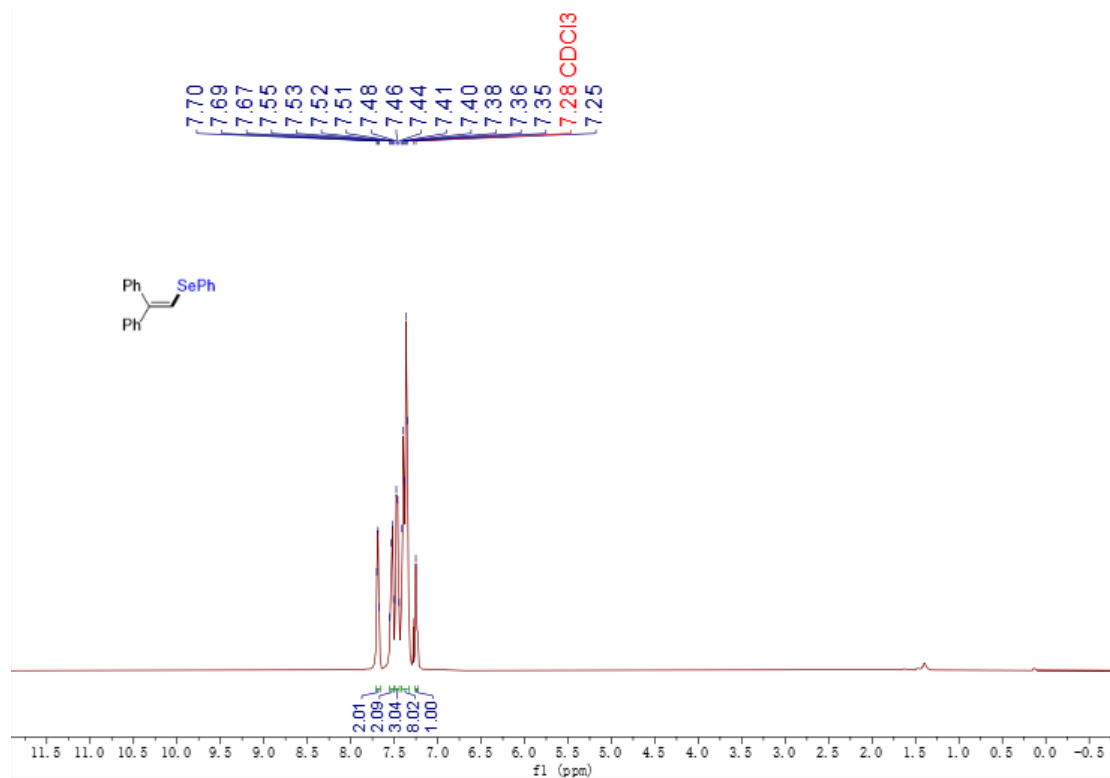

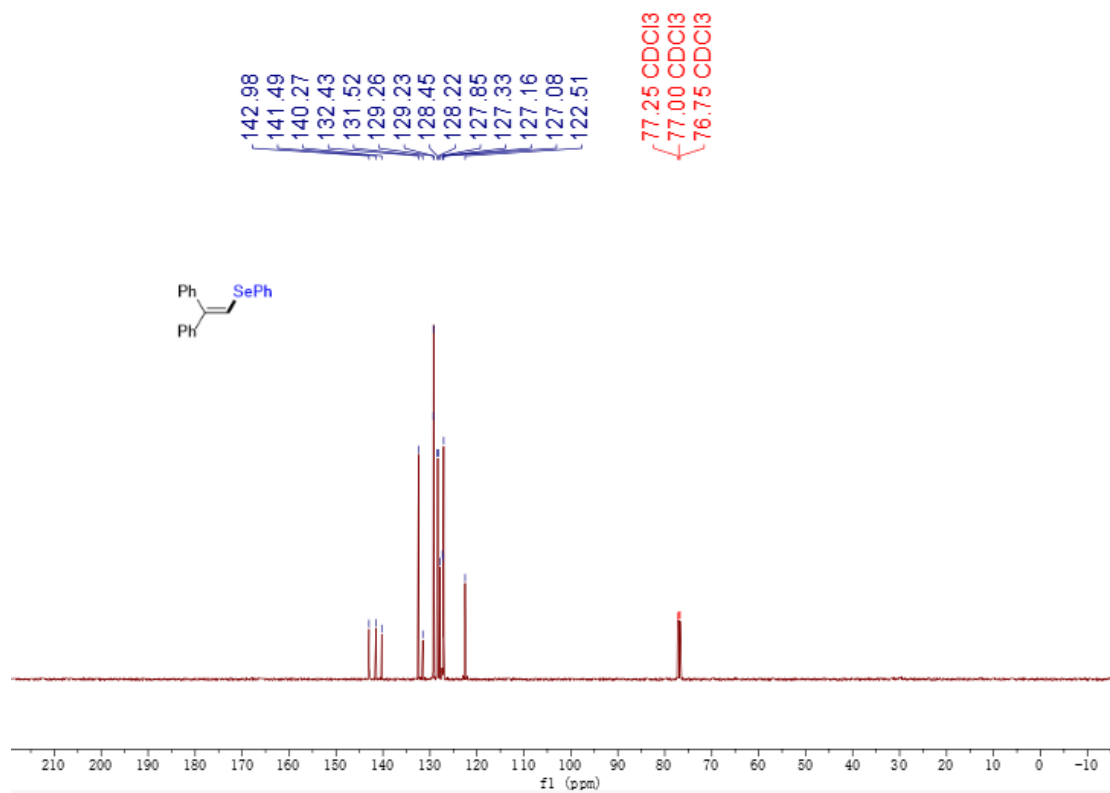

**Figure S36.** The <sup>1</sup>H (500 MHz), <sup>13</sup>C (125 MHz) NMR spectrum for (1*S*,2*R*,4*S*)-1,7,7-trimethylbicyclo [2.2.1] heptan-2-yl 4-ethynylbenzoate (**1v**) in CDCl<sub>3</sub>.

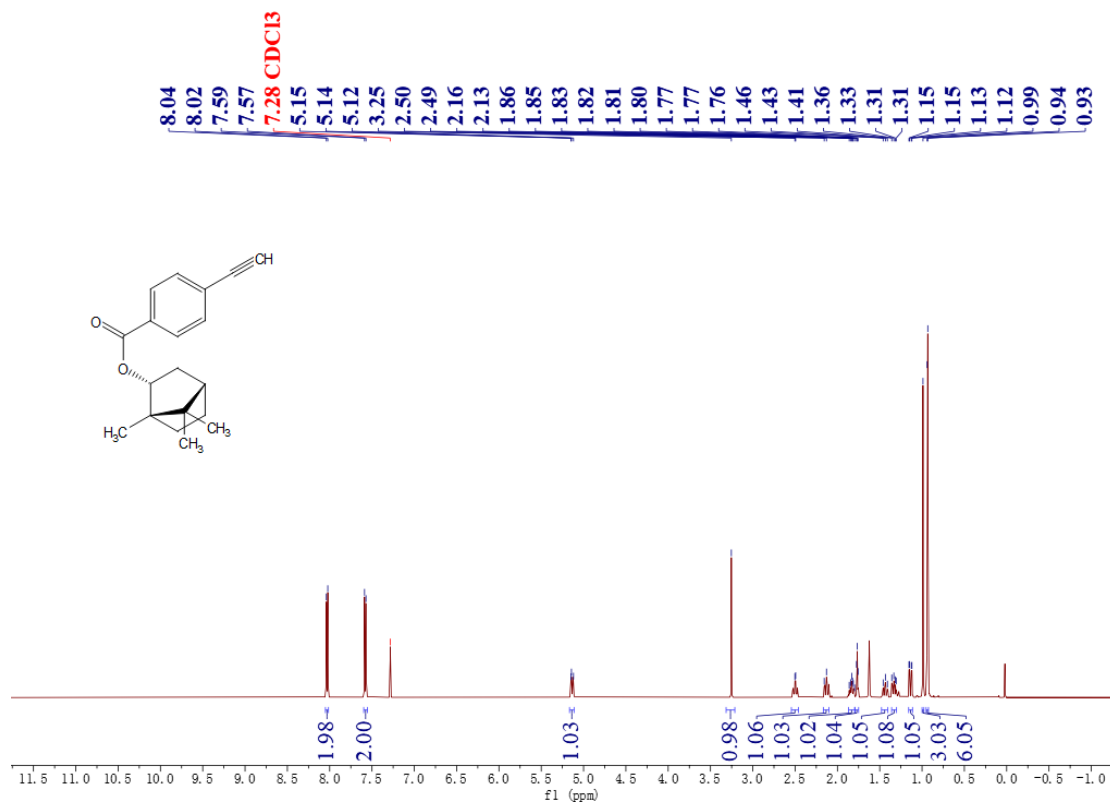

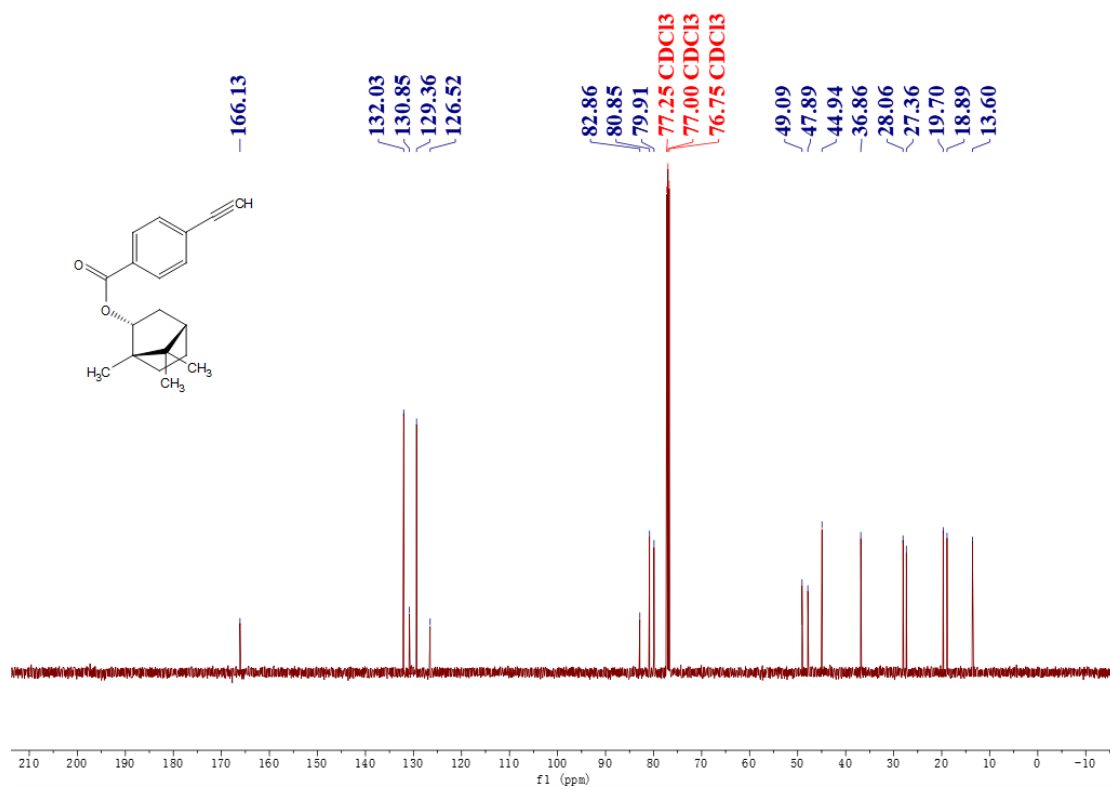

**Figure S37.** The <sup>1</sup>H (500 MHz), <sup>13</sup>C (125 MHz) NMR spectrum for (2*R*,5*S*)-2-isopropyl-5-methylcyclohexyl 4-ethynylbenzoate (**1w**) in CDCl<sub>3</sub>.

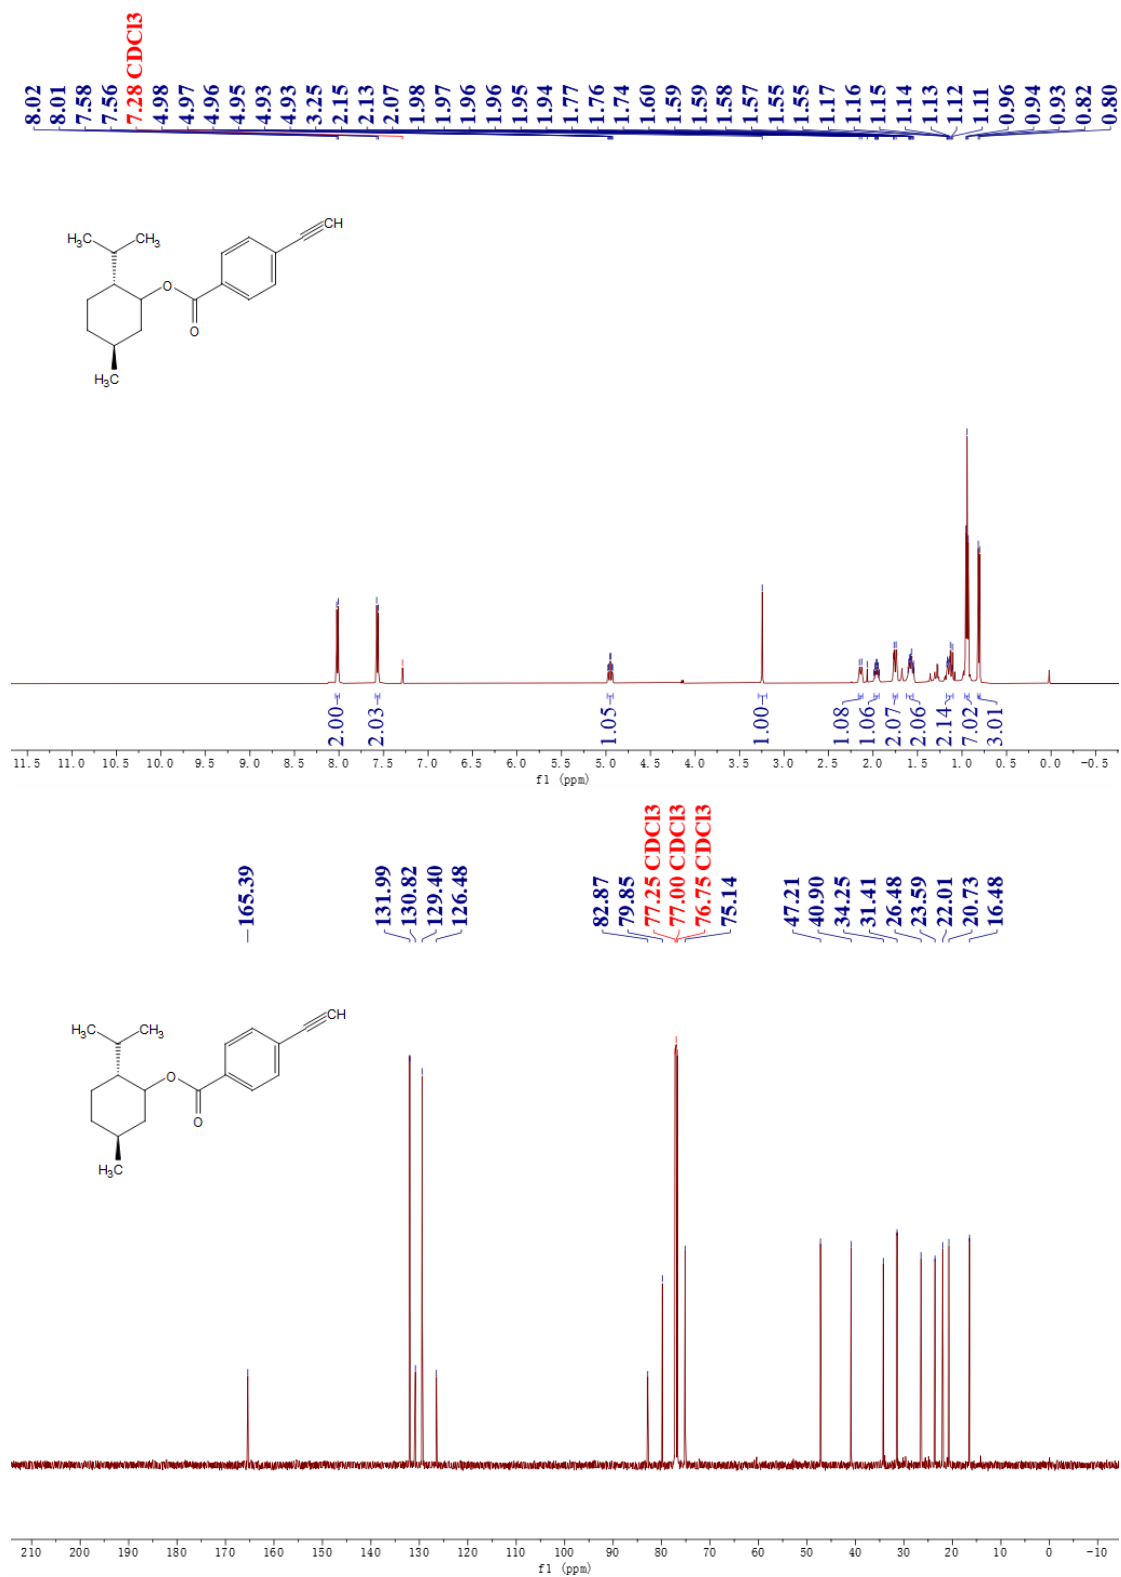

**Figure S38.** The <sup>1</sup>H (500 MHz), <sup>13</sup>C (125 MHz) NMR spectrum for 1,2-bis(4-chlorophenyl)disele nide (**2b**) in CDCl<sub>3</sub>.

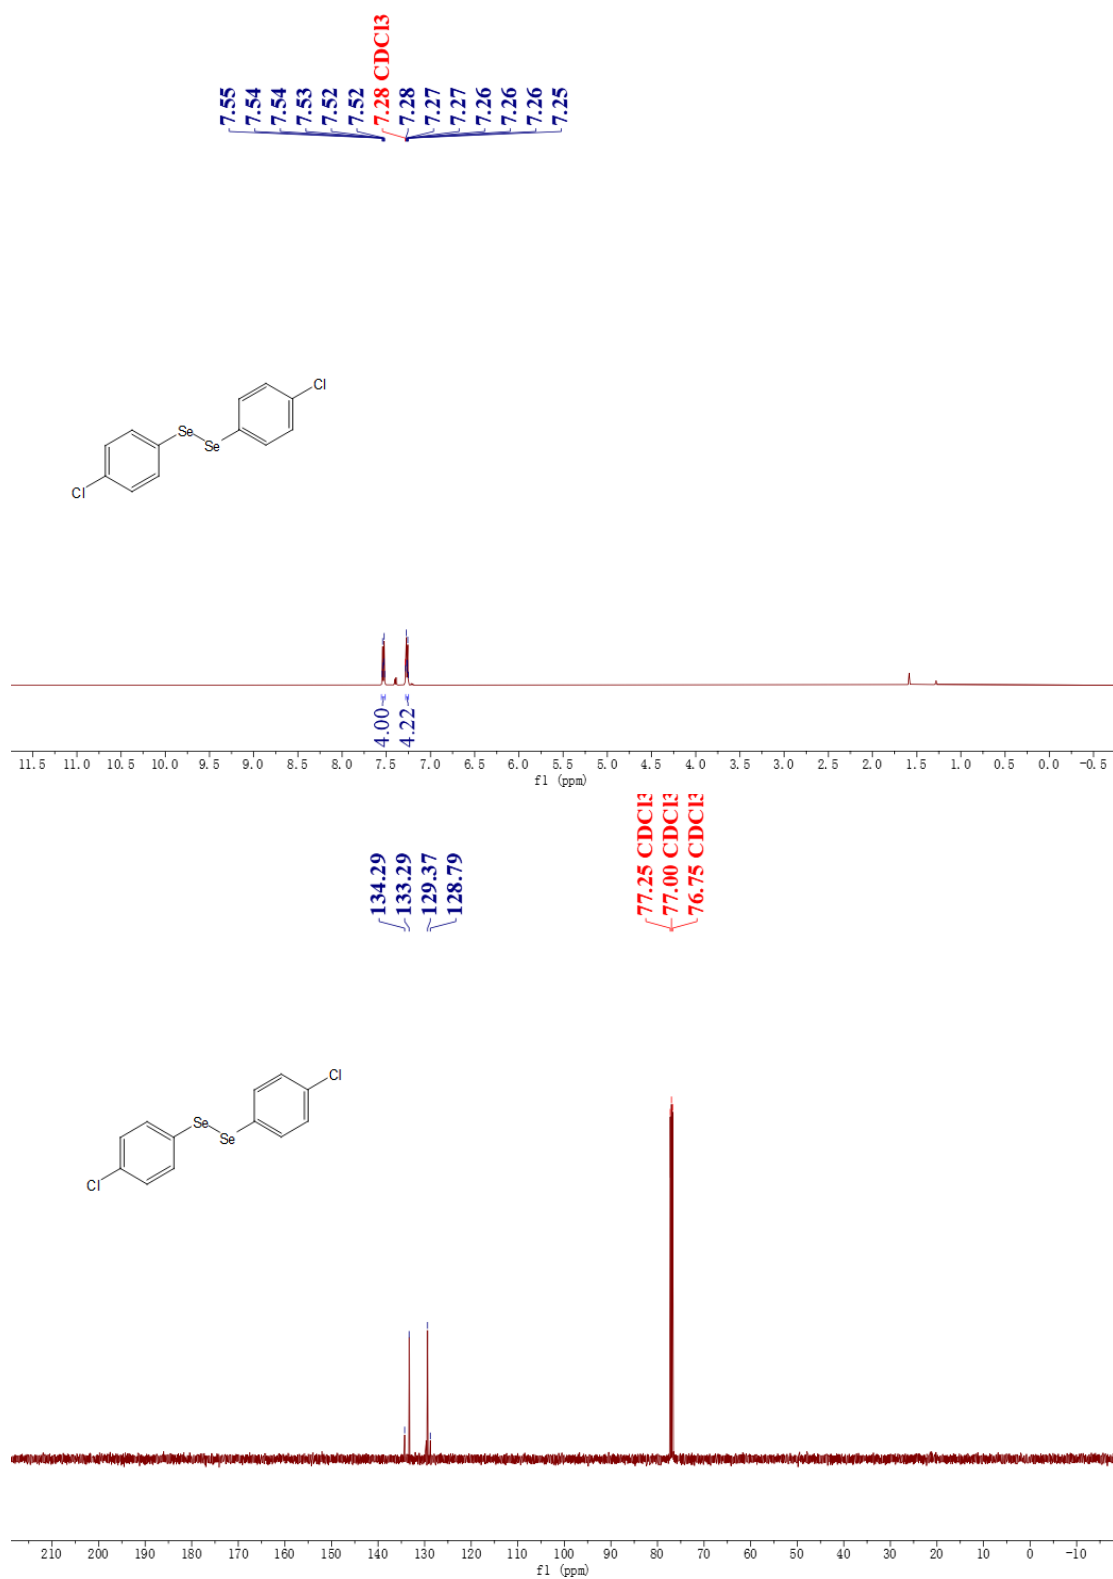

**Figure S39.** The <sup>1</sup>H (500 MHz), <sup>13</sup>C (125 MHz) NMR spectrum for 1, 2-di-p-tolyldiselenide (**2c**) in CDCl<sub>3</sub>.

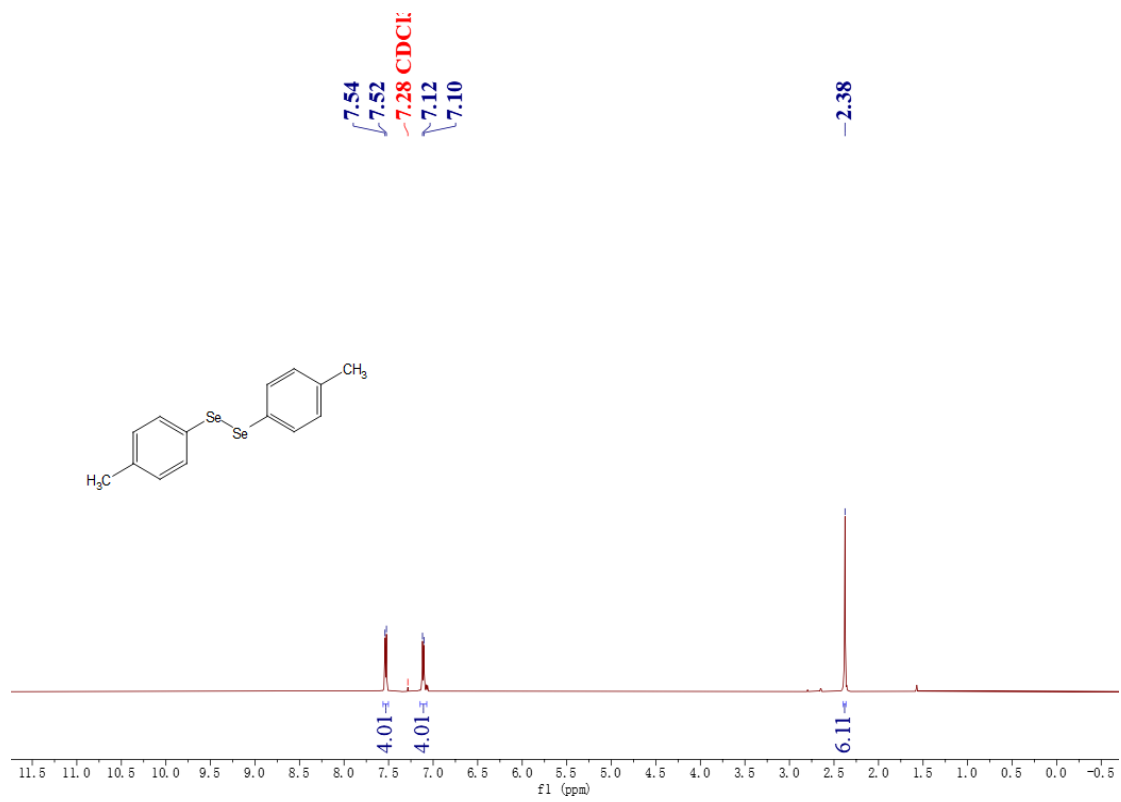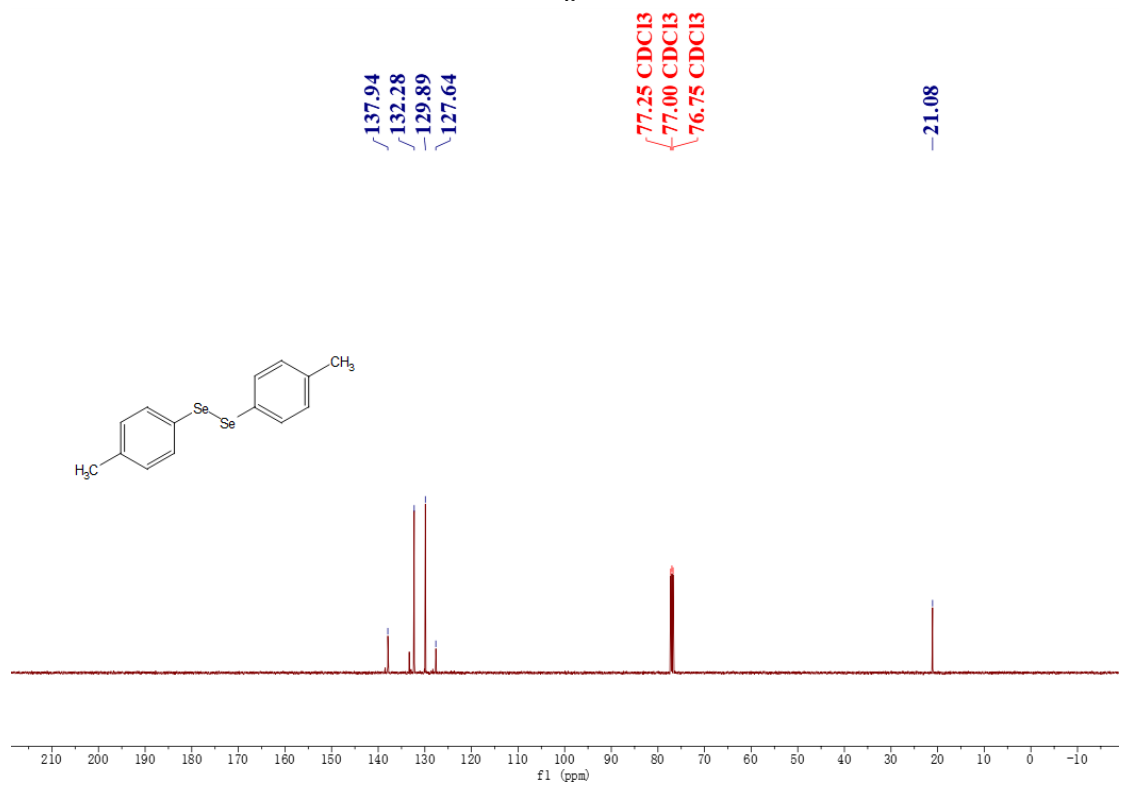



**Figure S40.** The  $^1\text{H}$  (500 MHz),  $^{13}\text{C}$  (125 MHz) NMR spectrum for 1,2-bis(4-bromophenyl)diselenide (**2d**) in  $\text{CDCl}_3$ .

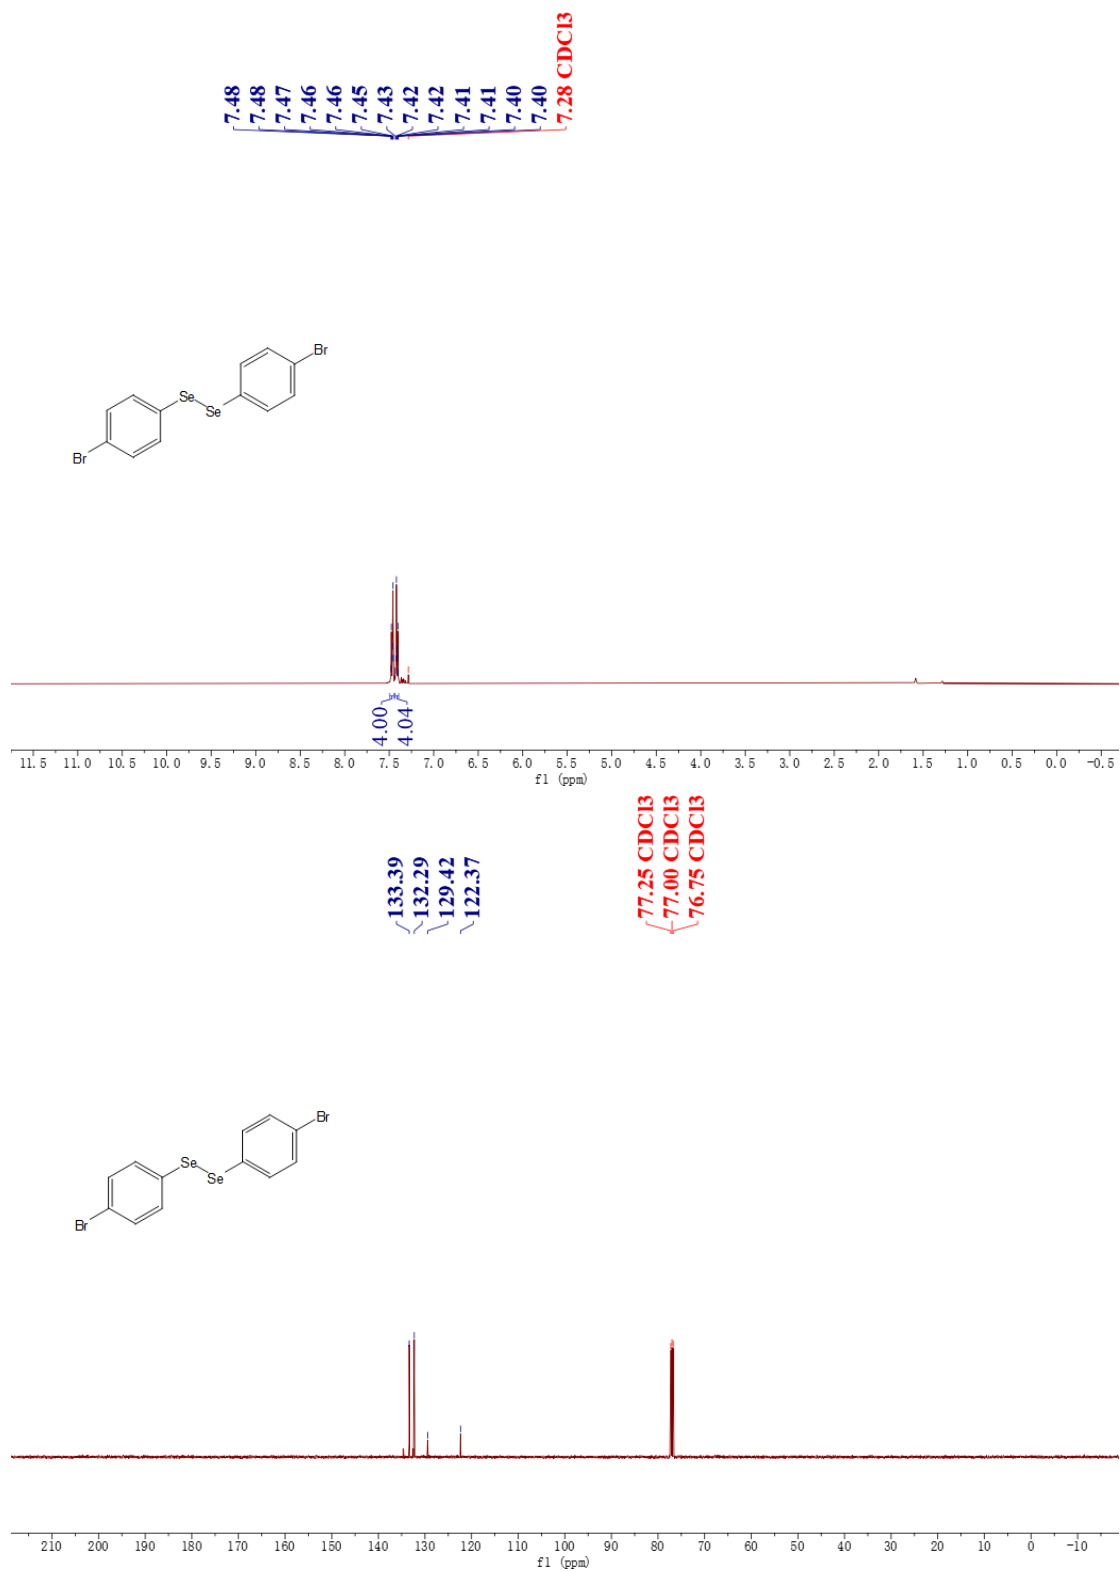

## References

1. Zuo, H. D.; Zhu, S. S.; Hao, W. J.; Wang, S. C.; Tu, S. J.; Jiang, B., Copper-Catalyzed Asymmetric Deconstructive Alkynylation of Cyclic Oximes. *ACS Catal.* **2021**, *11*, 6010–6019.
2. Deng, Y. Y.; Zeng, X. H.; Xu, H.; Liu, J. W.; Zhang, J. Y.; Hu, D. C.; Xie, J. L., Highly efficient synthesis of diselenides and ditellurides catalyzed by polyoxomolybdate-based copper. *New J. Chem.* **2022**, *46*, 20078–20081.
3. Hou, Z. W.; Li, L. Q.; Wang, L., Regio- and stereoselective electrochemical selenoalkylation of alkynes with 1, 3-dicarbonyl compounds and diselenides. *Org. Chem. Front.* **2022**, *10*, 2815–2820.
4. Tan, P.; Li, N.; Xu, X., Highly Regio- and Stereo-selective Synthesis of (Z)-1-Arylthio-2-Arylseleno Alkenes. *Chin. J. Org. Chem.* **2012**, *32*, 2162–2165.
